# Supplementary material
Source: publisher figshare collection journal article supplement (https://acs.figshare.com/ndownloader/files/13063985)
Supplement: Supplementary file 1 [file 13063985]

## Supporting Information

### 2,6-Bis(trifluoromethyl)phenylboronic Esters as Protective Groups for Diols: A Protection/Deprotection Protocol for Use under Mild Conditions

Naoyuki Shimada,<sup>\*,†</sup> Sari Urata,<sup>†</sup> Kenji Fukuhara,<sup>†</sup> Takao Tsuneda,<sup>‡</sup> and  
Kazuishi Makino<sup>\*,†</sup>

<sup>†</sup>Laboratory of Organic Chemistry for Drug Development and Medical Research Laboratories,  
Department of Pharmaceutical Sciences, Kitasato University, Tokyo 108-8641, Japan

<sup>‡</sup>Fuel Cell Nanomaterials Center, University of Yamanashi, Kofu 400-0021, Japan

#### Table of Contents

|                                                                                                                                                                                                           |     |
|-----------------------------------------------------------------------------------------------------------------------------------------------------------------------------------------------------------|-----|
| 1. General information                                                                                                                                                                                    | S2  |
| 2. Preparation of 2,6-bis(trifluoromethyl)phenylboronic acid ( <i>o</i> -FXylB(OH) <sub>2</sub> , <b>1a</b> )                                                                                             | S2  |
| 3. Preparations of 1,3-diols <b>2c</b> , <b>2d</b> , and <b>2e</b>                                                                                                                                        | S3  |
| 4. General procedure for the formations of boronic esters and characterization data for compounds <b>3a–k</b>                                                                                             | S6  |
| 5. Experimental procedures for the chemical transformation of 2,6-bis(trifluoromethyl)phenyl- boronic esters                                                                                              | S10 |
| 6. Experimental procedures for the deprotection of 2,6-bis(trifluoromethyl)phenyl- boronic ester <b>3e</b> and the formation of <i>o</i> -FXylB(OH) <sub>2</sub> from potassium trifluoroborate <b>17</b> | S21 |
| 7. Experimental procedures for the synthesis of enetriyne natural product <b>18</b>                                                                                                                       | S23 |
| 8. Estimation of the half-lives of boronic esters <b>3e</b> , <b>3l–n</b>                                                                                                                                 | S24 |
| 9. DFT calculations of boronic esters <b>3o–r</b>                                                                                                                                                         | S25 |
| 10. <sup>1</sup> H and <sup>13</sup> C NMR spectra                                                                                                                                                        | S32 |

## 1. General information

NMR spectra were recorded on Agilent Technologies 400-MR DD2 (400 MHz for  $^1\text{H}$ , 100 MHz for  $^{13}\text{C}$ , 377 MHz for  $^{19}\text{F}$ ), 400-MR (400 MHz for  $^1\text{H}$ , 100 MHz for  $^{13}\text{C}$ , 377 MHz for  $^{19}\text{F}$ ), NMR DD2 400NB (128 MHz for  $^{11}\text{B}$ ) spectrometers.  $^1\text{H}$ -NMR data are reported as follows; chemical shift in parts per million (ppm) downfield or upfield from  $\text{CDCl}_3$  ( $\delta$  7.26),  $\text{CD}_3\text{OD}$  ( $\delta$  3.31) integration, multiplicity (br = broad, s = singlet, d = doublet, t = triplet, q = quartet, sep = septet, dd = double doublet, ddd = double double doublet, dt = double triplet, dq = double quartet, and m = multiplet), and coupling constants (Hz).  $^{13}\text{C}$ -NMR chemical shifts are reported in ppm downfield or upfield from  $\text{CDCl}_3$  ( $\delta$  77.0) or  $\text{CD}_3\text{OD}$  ( $\delta$  49.0).  $^{19}\text{F}$ -NMR chemical shifts are reported in ppm downfield or upfield from  $\text{C}_6\text{H}_5\text{F}$  ( $\delta$  -113.15).  $^{11}\text{B}$ -NMR chemical shifts are reported in ppm downfield or upfield from  $\text{PhB}(\text{OH})_2$  ( $\delta$  28.82). Mass spectra were measured with JEOL JMS-AX505HA, JMS-700 MStation, and JEOL JMS-T100LP spectrometers. Melting points (mp) were obtained on Stanford Research Systems MPA100 melting point apparatus. Thin-layer chromatography (TLC) was carried out on Merck 60F-254 precoated silica gel plates and were visualized by fluorescence quenching under UV light. Column chromatography was performed using Silica Gel 60N (spherical, neutral, 63-210  $\mu\text{m}$ ) (Kanto Chemical Co., Inc.). Air- and/or moisture-sensitive reactions were carried out under an argon atmosphere using oven-dried glassware. Alcohol **2a**, **2b**, **2f**, **2g**, **2h**, **2i**, **2j**, and **16** were purchased from commercial suppliers and used without further purification. Alcohol **2k**<sup>1</sup> and triyne **19**<sup>2</sup> were synthesized according to the literature.

## 2. Preparation of 2,6-bis(trifluoromethyl)phenylboronic acid (*o*-FXylB(OH)<sub>2</sub>, **1a**)<sup>3</sup>

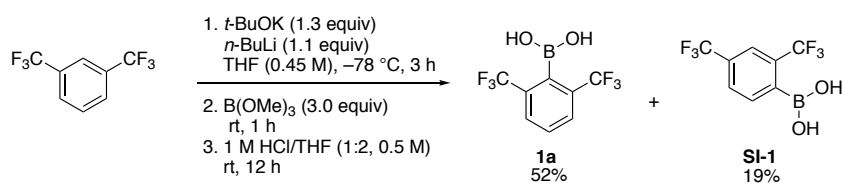

To a solution of *t*-BuOK (947 mg, 8.44 mmol, 1.3 equiv)<sup>4</sup> and 1,3-bis(trifluoromethyl)benzene (1.39 g, 6.49 mmol, 1.0 equiv) in THF (14 mL, 0.45 M) at -78 °C was added dropwise a solution of *n*-BuLi in *n*-hexane (1.6 M in *n*-hexane, 4.46 mL, 7.14 mmol, 1.1 equiv). After stirring for 3 h, trimethyl borate (2.18 mL, 19.5 mmol, 3.0 equiv) was added at -78 °C and the mixture was stirred for 1 h at room temperature. The reaction was quenched by adding 1 M aqueous HCl/THF (15 mL, 1 M aqueous HCl : THF = 1 : 2). After stirring 12 h at room temperature, the resulting mixture was extracted with EtOAc (2 x 30 mL). The combined organic layer was washed successively with H<sub>2</sub>O (30 mL) and brine (30 mL), and dried over Na<sub>2</sub>SO<sub>4</sub>. Filtration and concentration under reduced pressure furnished the crude product, which was purified by silica gel column chromatography



(*n*-hexane : EtOAc = 4 : 1) to give **1a** (881 mg, 3.44 mmol, 52% yield) as a yellow solid and **SI-1** (316 mg, 1.23 mmol, 19% yield) as a yellow solid.

Data for **1a**:  $R_f$  0.34 (4/1 *n*-hexane/EtOAc); mp 171-172 °C;  $^1\text{H-NMR}$  (400 MHz,  $\text{CD}_3\text{OD}$ )  $\delta$  7.90 (d,  $J$  = 8.0 Hz, 2H), 7.69 (t,  $J$  = 8.0 Hz, 1H);  $^{13}\text{C NMR}$  (100 MHz,  $\text{CD}_3\text{OD}$ )  $\delta$  134.4 (q,  $^2J_{\text{C-F}}$  = 31.1 Hz), 130.2, 129.9 (q,  $^3J_{\text{C-F}}$  = 4.4 Hz), 125.7 (q,  $^1J_{\text{C-F}}$  = 271.9 Hz);  $^{19}\text{F-NMR}$  (377 MHz,  $\text{CDCl}_3$ )  $\delta$  -8.41;  $^{11}\text{B-NMR}$  (128 MHz,  $\text{CDCl}_3$ )  $\delta$  29.73;  $^{11}\text{B-NMR}$  (128 MHz,  $\text{CD}_3\text{OD}/\text{D}_2\text{O}$  = 9:1)  $\delta$  29.29; IR (KBr)  $\nu$  = 3346, 1582, 1476, 1350, 1302, 1209, 1186, 1110, 1065, 1010, 839  $\text{cm}^{-1}$ ; HRMS (EI)  $m/z$  Calcd for  $\text{C}_8\text{H}_5^{11}\text{BF}_6\text{O}_2 [\text{M}]^+$  258.0287, found 258.028.

Data for **SI-1**:  $R_f$  0.13 (4/1 *n*-hexane/EtOAc); mp 109-110 °C;  $^1\text{H-NMR}$  (400 MHz,  $\text{CD}_3\text{OD}$ )  $\delta$  7.95 (s, 1H), 7.91 (d,  $J$  = 15.6 Hz, 1H), 7.73 (d,  $J$  = 7.6 Hz, 1H);  $^{13}\text{C NMR}$  (100 MHz,  $\text{CD}_3\text{OD}$ )  $\delta$  143.1, 141.0 (q,  $J$  = 31.3 Hz), 138.6 (q,  $J$  = 32.7 Hz), 137.3 (q,  $J$  = 3.5 Hz), 133.5 (q,  $J$  = 271.9 Hz), 133.1 (q,  $J$  = 270.4 Hz), 131.0 (m);  $^{19}\text{F-NMR}$  (377 MHz,  $\text{CDCl}_3$ )  $\delta$  -60.40, -62.38; IR (KBr)  $\nu$  = 3358, 1344, 1121, 849  $\text{cm}^{-1}$ ; HRMS (EI)  $m/z$  Calcd for  $\text{C}_8\text{H}_5^{11}\text{BF}_6\text{O}_2 [\text{M}]^+$  258.0287, found 258.028.

### 3. Preparations of 1,3-diols **2c**, **2d**, and **2e**

#### Preparation of hept-6-ene-1,3-diol (**2c**)

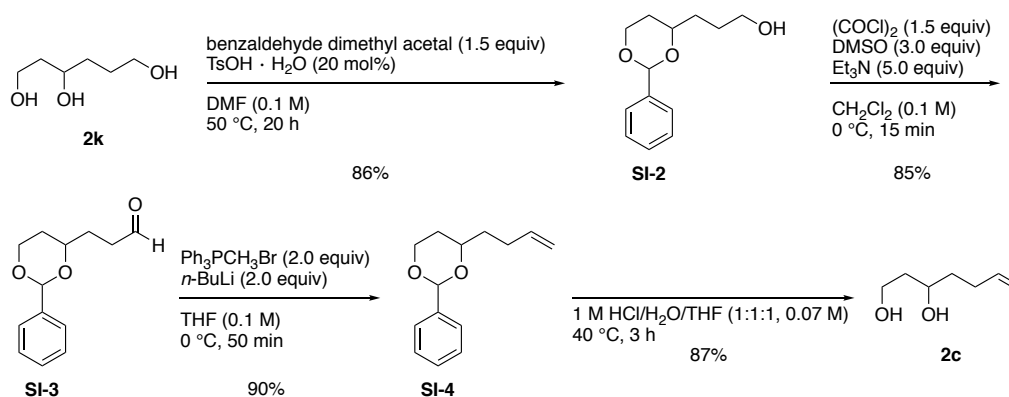

To a stirred solution of **2k**<sup>1</sup> (126 mg, 0.940 mmol) and benzaldehyde dimethyl acetal (0.200 mL, 1.41 mmol, 1.5 equiv) in DMF (10 mL, 0.094 M) at room temperature was added *p*-toluenesulfonic acid monohydrate (35.8 mg, 0.188 mmol, 20 mol%). After stirring for 20 h at 50 °C, the reaction was quenched by adding saturated aqueous  $\text{NaHCO}_3$  (10 mL). The resulting mixture was extracted with EtOAc/hexane (4:1, 2 x 10 mL). The combined organic extract was washed with  $\text{H}_2\text{O}$  (20 mL), and dried over  $\text{Na}_2\text{SO}_4$ . Filtration and concentration under reduced pressure furnished the crude product, which was purified by silica gel column chromatography (*n*-hexane : EtOAc = 3 : 2) to give **SI-2** (181 mg, 0.813 mmol, 86% yield) as a colorless oil.

Data for **SI-2**:  $R_f$  = 0.29 (1/1 *n*-hexane/EtOAc);  $^1\text{H-NMR}$  (400 MHz,  $\text{CDCl}_3$ )  $\delta$  7.50-7.47 (m, 2H), 7.39-7.30 (m, 3H), 5.52 (s, 1H), 4.28 (ddd,  $J$  = 11.6, 5.2, 1.2 Hz, 1H), 3.97 (ddd,  $J$  = 12.0, 11.6, 2.4 Hz, 1H), 3.92-3.86 (m, 1H), 3.69-3.66 (m, 2H);  $^{13}\text{C NMR}$  (100 MHz,  $\text{CDCl}_3$ )  $\delta$  138.6, 128.7, 128.2, 126.0, 101.2, 77.2, 67.0, 62.7, 32.5, 31.2, 28.5; IR (neat)  $\nu$  = 3402, 2923, 2863, 1027  $\text{cm}^{-1}$ ; HRMS (ESI)  $m/z$  Calcd for  $\text{C}_{13}\text{H}_{18}\text{O}_3\text{Na} [\text{M}+\text{Na}]^+$  245.1154, found 245.1156.

To a stirred solution of oxalyl chloride (386  $\mu\text{L}$ , 4.53 mmol, 1.5 equiv) in  $\text{CH}_2\text{Cl}_2$  (20 mL) at  $-78^\circ\text{C}$  was dropwise added DMSO (544  $\mu\text{L}$ , 9.05 mmol, 3.0 equiv) over 5 min. The mixture was stirred for 10 min at  $-78^\circ\text{C}$  and a solution of **SI-2** (670 mg, 3.02 mmol) in  $\text{CH}_2\text{Cl}_2$  (20 mL) was added dropwise. After stirring for 20 min,  $\text{Et}_3\text{N}$  (2.10 mL, 15.1 mmol, 5.0 equiv) was added dropwise at  $-78^\circ\text{C}$ . After the mixture was stirred at  $0^\circ\text{C}$  for 15 min, the reaction was quenched by adding saturated aqueous  $\text{NH}_4\text{Cl}$  (30 mL). The resulting mixture was extracted with  $\text{CH}_2\text{Cl}_2$  (2 x 30 mL). The combined organic layer was washed with brine (40 mL), and dried over  $\text{Na}_2\text{SO}_4$ . Filtration and concentration under reduced pressure furnished the crude product, which was purified by silica gel column chromatography (*n*-hexane : EtOAc = 2 : 1) to give **SI-3** (563 mg, 2.56 mmol, 85% yield) as a colorless oil.

Data for **SI-3**:  $R_f$  = 0.30 (4/1 *n*-hexane/EtOAc);  $^1\text{H-NMR}$  (400 MHz,  $\text{CDCl}_3$ )  $\delta$  9.81 (t,  $J$  = 1.2 Hz, 1H), 7.48-7.44 (m, 2H), 7.39-7.31 (m, 3H), 5.49 (s, 1H), 4.27 (ddd,  $J$  = 11.6, 5.2, 1.2 Hz, 1H), 3.95 (ddd,  $J$  = 12.4, 11.6, 2.4 Hz, 1H), 3.91-3.84 (m, 1H), 2.71-2.58 (m, 2H), 2.01-1.79 (m, 3H), 1.58-1.52 (m, 1H);  $^{13}\text{C NMR}$  (100 MHz,  $\text{CDCl}_3$ )  $\delta$  202.12, 202.09, 138.54, 138.53, 128.71, 128.70, 128.19, 128.18, 125.9, 101.1, 76.0, 66.8, 39.6, 31.2, 31.2, 28.3; IR (neat)  $\nu$  = 2925, 2853, 1723, 1364, 1105  $\text{cm}^{-1}$ ; HRMS (ESI)  $m/z$  Calcd for  $\text{C}_{13}\text{H}_{16}\text{O}_3\text{Na}$   $[\text{M}+\text{Na}]^+$  243.1000, found 243.1000.

To a solution of methyltriphenylphosphonium bromide (1.82 g, 0.200 mmol, 2.0 equiv) in THF (15 mL) at  $0^\circ\text{C}$  was added dropwise a solution of *n*-BuLi in hexane (1.6 M in hexane, 3.18 mL, 5.09 mmol, 2.0 equiv). After stirring for 20 min at  $0^\circ\text{C}$ , a solution of **SI-3** (560 mg, 2.54 mmol) in THF (10 mL) was added dropwise to the mixture. After stirring for 50 min at  $0^\circ\text{C}$ , the reaction mixture was diluted with  $\text{Et}_2\text{O}$  (2.0 mL). The resulting mixture was filtered through a Celite pad and rinsed with  $\text{Et}_2\text{O}$  (100 mL). Concentration under reduced pressure furnished the crude product, which was purified by silica gel column chromatography (*n*-hexane : EtOAc = 2 : 1) to give **SI-4** (500 mg, 2.29 mmol, 90% yield) as a colorless oil.

Data for **SI-4**:  $R_f$  = 0.38 (4/1 *n*-hexane/EtOAc);  $^1\text{H-NMR}$  (400 MHz,  $\text{CDCl}_3$ )  $\delta$  7.52-7.49 (m, 2H), 7.39-7.31 (m, 3H), 5.85 (ddt,  $J$  = 17.2, 10.4, 6.8 Hz, 1H), 5.51 (s, 1H), 5.05 (dq,  $J$  = 17.2, 1.6 Hz, 1H), 4.97-5.01 (m, 1H), 4.27 (ddd,  $J$  = 11.6, 5.2, 1.2 Hz, 1H), 3.96 (ddd,  $J$  = 12.4, 11.6, 2.8 Hz, 1H), 3.89-3.82 (m, 1H), 2.32-2.15 (m, 2H), 1.88-1.75 (m, 2H), 1.67-1.58 (m, 1H), 1.58-1.50 (m, 1H);  $^{13}\text{C NMR}$  (100 MHz,  $\text{CDCl}_3$ )  $\delta$  138.9, 138.2, 128.6, 128.2, 126.0, 114.8, 101.1, 76.4, 67.0, 35.0, 31.3, 29.1; IR (neat)  $\nu$  = 2925, 2852, 1364, 1105  $\text{cm}^{-1}$ ; HRMS (FAB)  $m/z$  Calcd for  $\text{C}_{14}\text{H}_{19}\text{O}_2$   $[\text{M}+\text{H}]^+$  219.2385, found 219.1396.

A solution of **SI-4** (500 mg, 2.29 mmol) in 0.5 M aqueous HCl and THF (30 mL, 0.076 M, 0.5 M aqueous HCl : THF = 2 : 1) was stirred for 3 h at  $40^\circ\text{C}$ . The reaction mixture was extracted with  $\text{CHCl}_3$ , (6 x 20 mL). The combined organic layer was dried over  $\text{Na}_2\text{SO}_4$ . Filtration and concentration under reduced pressure furnished the crude product, which was purified by silica gel column chromatography (EtOAc) to give **2c** (258 mg, 1.98 mmol, 87% yield) as a colorless oil.

Data for **2c**:  $R_f$  = 0.15 (2/1 *n*-hexane/EtOAc);  $^1\text{H-NMR}$  (400 MHz,  $\text{CDCl}_3$ )  $\delta$  5.84 (ddt,  $J$  = 17.2, 10.0, 6.8 Hz, 1H), 5.05 (dq,  $J$  = 17.2, 1.6 Hz, 1H), 5.00-4.96 (m, 1H), 3.92-3.08 (m, 3H), 2.52 (br,

2H), 2.25-2.01 (m, 2H), 1.76-1.52 (m, 4H);  $^{13}\text{C}$  NMR (100 MHz,  $\text{CDCl}_3$ )  $\delta$  138.3, 145.0, 71.8, 61.8, 38.3, 36.7, 29.9; IR (neat)  $\nu$  = 3343, 2937, 1058  $\text{cm}^{-1}$ ; HRMS (ESI)  $m/z$  Calcd for  $\text{C}_7\text{H}_{15}\text{O}_2$   $[\text{M}+\text{H}]^+$  131.1072, found 131.1080.

#### Preparation of 4,6-dihydroxyhexyl acetate (**2d**)

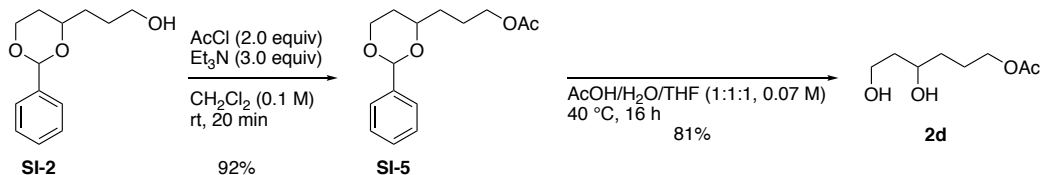

To a stirred solution of **SI-2** (111 mg, 0.500 mmol) and triethyl amine (209  $\mu\text{L}$ , 1.50 mmol, 3.0 equiv) in  $\text{CH}_2\text{Cl}_2$  (5.0 mL, 0.10 M) at room temperature was added acetyl chloride (71.4  $\mu\text{L}$ , 1.00 mmol, 2.0 equiv). After stirring for 20 min, the reaction was quenched by adding 1 M aqueous HCl (5.0 mL). The resulting mixture was extracted with  $\text{CH}_2\text{Cl}_2$  (2 x 10 mL). The combined organic layer was washed with brine (20 mL), and dried over  $\text{Na}_2\text{SO}_4$ . Filtration and concentration under reduced pressure furnished the crude product, which was purified by silica gel column chromatography (*n*-hexane : EtOAc = 5 : 1) to give **SI-5** (121 mg, 0.458 mmol, 92% yield) as a colorless oil.

Data for **SI-5**:  $R_f$  = 0.18 (4/1 *n*-hexane/EtOAc);  $^1\text{H}$ -NMR (400 MHz,  $\text{CDCl}_3$ )  $\delta$  7.57-7.47 (m, 2H), 7.38-7.30 (m, 3H), 5.51 (s, 1H), 4.27 (ddd,  $J$  = 11.4, 5.0, 1.3 Hz, 1H), 4.16-4.06 (m, 2H) 3.96 (ddd,  $J$  = 12.3, 11.4, 2.6 Hz, 1H), 3.89-3.83 (m, 1H), 2.05 (s, 3H), 1.93-1.50 (m, 6H);  $^{13}\text{C}$  NMR (100 MHz,  $\text{CD}_3\text{OD}$ )  $\delta$  171.1, 138.7, 128.6, 128.2, 126.0, 101.1, 76.6, 66.9, 64.3, 32.3, 31.3, 24.3, 20.9; IR (neat)  $\nu$  = 2956, 2853, 1738, 1243, 1108  $\text{cm}^{-1}$ ; HRMS (ESI)  $m/z$  Calcd for  $\text{C}_{15}\text{H}_{20}\text{O}_4\text{Na}$   $[\text{M}+\text{Na}]^+$  287.1259, found 287.1256.

A solution of **SI-5** (121 mg, 0.458 mmol) in AcOH,  $\text{H}_2\text{O}$  and THF (6.5 mL, 0.070 M, AcOH :  $\text{H}_2\text{O}$  : THF = 1 : 1 : 1) was stirred for 16 h at 40  $^\circ\text{C}$ . The reaction mixture was extracted with  $\text{CHCl}_3$ , (4 x 10 mL). The combined organic layer was washed with brine (40 mL), and dried over  $\text{Na}_2\text{SO}_4$ . Filtration and concentration under reduced pressure furnished the crude product, which was purified by silica gel column chromatography ( $\text{CHCl}_3$  : MeOH = 19:1) to give **2d** (65.6 mg, 0.373 mmol, 81% yield) as a colorless oil.

Data for **2d**:  $R_f$  = 0.15 (1/2 *n*-hexane/EtOAc);  $^1\text{H}$ -NMR (400 MHz,  $\text{CDCl}_3$ )  $\delta$  4.09 (t,  $J$  = 6.8 Hz, 2H), 3.92-3.79 (m, 3H), 2.87 (br, 1H), 2.60 (br, 1H), 2.04 (s, 3H), 1.84-1.64 (m, 4H), 1.57-1.51 (m, 2H);  $^{13}\text{C}$  NMR (100 MHz,  $\text{CDCl}_3$ )  $\delta$  171.4, 71.1, 64.4, 61.3, 38.3, 33.8, 24.7, 20.9; IR (neat)  $\nu$  = 3384, 2940, 1732, 1254, 1050  $\text{cm}^{-1}$ ; HRMS (EI)  $m/z$  Calcd for  $\text{C}_8\text{H}_{17}\text{O}_4$   $[\text{M}+\text{H}]^+$  177.1127, found 177.1122.

### Preparation of 6-(benzyloxy)hexane-1,3-diol (**2e**)

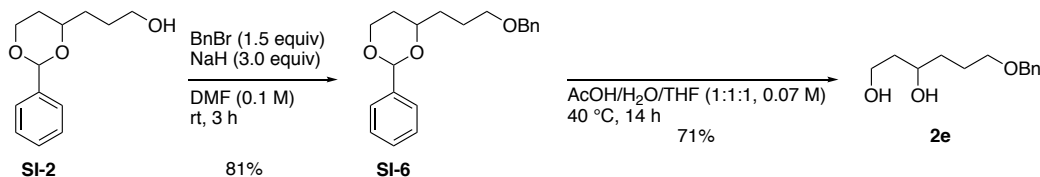

To a suspension of sodium hydride (44.4 mg, 1.85 mmol, 3.0 equiv) in DMF (2.2 mL) at 0 °C was added dropwise a solution of **SI-2** (137 mg, 0.617 mmol) in DMF (2.0 mL) and the mixture was stirred for 10 min at room temperature. Benzyl bromide (110  $\mu$ L, 0.926 mmol, 1.5 equiv) was added dropwise at 0 °C and the mixture was stirred for 3 h. The reaction was quenched by adding saturated aqueous  $\text{NH}_4\text{Cl}$  (10 mL). The resulting mixture was extracted with EtOAc (2 x 10 mL). The combined organic layer was washed with brine (20 mL), and dried over  $\text{Na}_2\text{SO}_4$ . Filtration and concentration under reduced pressure furnished the crude product, which was purified by silica gel column chromatography (*n*-hexane : EtOAc = 9 : 1) to give **SI-6** (156 mg, 0.500 mmol, 81% yield) as a colorless oil.

Data for **SI-6**:  $R_f$  = 0.28 (4/1 *n*-hexane/EtOAc);  $^1\text{H-NMR}$  (400 MHz,  $\text{CDCl}_3$ )  $\delta$  7.50-7.47 (m, 2H), 7.38-7.26 (m, 8H), 5.49 (s, 1H), 4.51 (s, 2H), 4.26 (ddd,  $J$  = 11.6, 5.2, 1.2 Hz, 1H), 3.95 (ddd,  $J$  = 12.4, 11.6, 2.4 Hz, 1H), 3.87-3.81 (m, 1H), 3.57-3.47 (m, 2H), 1.90-1.64 (m, 5H), 1.55-1.50 (m, 1H);  $^{13}\text{C NMR}$  (100 MHz,  $\text{CDCl}_3$ )  $\delta$  138.8, 138.6, 128.6, 128.3, 128.2, 127.6, 127.5, 126.0, 101.1, 77.0, 72.9, 70.2, 67.1, 32.7, 31.3, 25.3; IR (neat)  $\nu$  = 3032, 2950, 2853, 1364, 1107  $\text{cm}^{-1}$ ; HRMS (ESI)  $m/z$  Calcd for  $\text{C}_{20}\text{H}_{24}\text{O}_3\text{Na}$   $[\text{M}+\text{Na}]^+$  335.1623, found 335.1610.

A solution of **SI-6** (156 mg, 0.500 mmol) in AcOH /  $\text{H}_2\text{O}$  / THF (7.0 mL, 0.071 M, AcOH :  $\text{H}_2\text{O}$  : THF = 1 : 1 : 1) was stirred for 14 h at 40 °C. The reaction mixture was extracted with  $\text{CHCl}_3$ , (5 x 10 mL). The combined organic layer was washed with brine (40 mL), and dried over  $\text{Na}_2\text{SO}_4$ . Filtration and concentration under reduced pressure furnished the crude product, which was purified by silica gel column chromatography (EtOAc) to give **2e** (80.0 mg, 0.357 mmol, 71% yield) as a colorless oil.

Data for **2e**:  $R_f$  = 0.13 (4/1 *n*-hexane/EtOAc);  $^1\text{H-NMR}$  (400 MHz,  $\text{CDCl}_3$ )  $\delta$  4.09 (t,  $J$  = 6.8 Hz, 2H), 3.92-3.79 (m, 3H), 2.87 (br, 1H), 2.60 (br, 1H), 2.04 (s, 3H), 1.84-1.64 (m, 4H), 1.57-1.51 (m, 2H);  $^{13}\text{C NMR}$  (100 MHz,  $\text{CDCl}_3$ )  $\delta$  171.4, 71.1, 64.4, 61.3, 38.3, 33.8, 24.7, 20.9; IR (neat)  $\nu$  = 3372, 2942, 2865, 1278, 1099  $\text{cm}^{-1}$ ; HRMS (ESI)  $m/z$  Calcd for  $\text{C}_{13}\text{H}_{20}\text{O}_3\text{Na}$   $[\text{M}+\text{Na}]^+$  247.1310, found 247.1311.

#### 4. General procedure for the formations of boronic esters and characterization data for compounds 3a–k

##### General procedure for the formation of boronic esters from diols

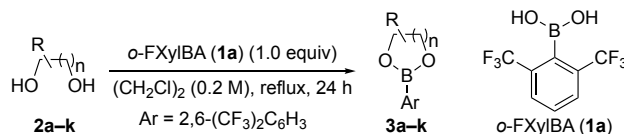

To a solution of diols **2a-k** (0.200 mmol, 1.0 equiv) in  $\text{ClCH}_2\text{CH}_2\text{Cl}$  (1.0 mL, 0.20 M) was added 2,6-bis(trifluoromethyl)phenylboronic acid (**1a**) (0.200 mmol, 1.0 equiv). After stirring for 24 h at reflux, the reaction mixture was concentrated under reduced pressure to give the crude boronic ester, which was purified by silica gel column chromatography.

##### 2-(2,6-Bis(trifluoromethyl)phenyl)-4-phenyl-1,3,2-dioxaborolane (**3a**)

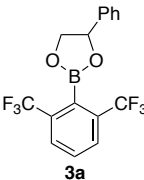 80% yield, Data for **3a**; yellow oil;  $R_f$  0.34 (20/1 *n*-hexane/EtOAc);  $^1\text{H-NMR}$  (400 MHz,  $\text{CDCl}_3$ )  $\delta$  7.88 (d,  $J$  = 8.0 Hz, 2H), 7.69 (t,  $J$  = 8.0 Hz, 1H), 7.43-7.34 (m, 5H), 5.66 (t,  $J$  = 8.8 Hz, 1H), 4.80 (t,  $J$  = 8.8 Hz, 1H), 4.24 (t,  $J$  = 8.8 Hz, 1H);  $^{13}\text{C-NMR}$  (100 MHz,  $\text{CDCl}_3$ )  $\delta$  139.5, 134.7 (q,  $^2J_{\text{C-F}}$  = 31.6 Hz), 130.1, 128.8, 128.7 (q,  $^3J_{\text{C-F}}$  = 4.0 Hz), 128.4, 125.9, 124.0 (q,  $^1J_{\text{C-F}}$  = 272.6 Hz), 80.1, 73.9;  $^{19}\text{F-NMR}$  (377 MHz,  $\text{CDCl}_3$ )  $\delta$  -59.79; IR (neat)  $\nu$  = 3037, 2912, 1580, 1297, 1132  $\text{cm}^{-1}$ ; HRMS (FAB)  $m/z$  Calcd for  $\text{C}_{16}\text{H}_{12}^{11}\text{BF}_6\text{O}_2$   $[\text{M}+\text{H}]^+$  361.0835, found 361.0833.

##### 2-(2,6-Bis(trifluoromethyl)phenyl)-5,5-dimethyl-1,3,2-dioxaborinane (**3b**)

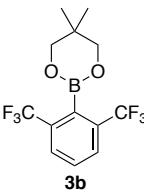 80% yield, Data for **3b**: yellow solid;  $R_f$  0.41 (20/1 *n*-hexane/EtOAc); mp 49-51  $^{\circ}\text{C}$ ;  $^1\text{H-NMR}$  (400 MHz,  $\text{CDCl}_3$ )  $\delta$  7.81 (d,  $J$  = 8.0 Hz, 2H), 7.58 (t,  $J$  = 8.0 Hz, 1H), 3.79 (s, 4H), 1.10 (s, 6H);  $^{13}\text{C-NMR}$  (100 MHz,  $\text{CDCl}_3$ )  $\delta$  133.8 (q,  $^2J_{\text{C-F}}$  = 31.0 Hz), 129.0, 128.6 (q,  $^3J_{\text{C-F}}$  = 4.4 Hz), 124.2 (q,  $^1J_{\text{C-F}}$  = 272.6 Hz), 72.8, 31.8, 22.4;  $^{19}\text{F-NMR}$  (377 MHz,  $\text{CDCl}_3$ )  $\delta$  -59.74; IR (KBr)  $\nu$  = 2921, 1164  $\text{cm}^{-1}$ ; HRMS (EI)  $m/z$  Calcd for  $\text{C}_{13}\text{H}_{13}^{11}\text{BF}_6\text{O}_2$   $[\text{M}]^+$  326.0913, found 326.0919.

##### 2-(2,6-Bis(trifluoromethyl)phenyl)-4-(but-3-en-1-yl)-1,3,2-dioxaborinane (**3c**)

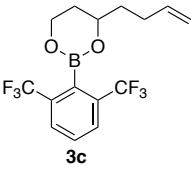 99% yield, Data for **3c**: yellow oil;  $R_f$  0.51 (9/1 *n*-hexane/EtOAc);  $^1\text{H-NMR}$  (400 MHz,  $\text{CDCl}_3$ )  $\delta$  7.79 (d,  $J$  = 8.0 Hz, 2H), 7.56 (t,  $J$  = 8.0 Hz, 1H), 5.83 (ddt,  $J$  = 17.2, 10.4, 6.8 Hz, 1H), 5.04 (dq,  $J$  = 17.2, 1.6 Hz, 1H), 5.04-4.96 (m, 1H), 4.22-4.08 (m, 3H), 2.28-2.12 (m, 2H), 2.04 (dq,  $J$  = 14.0, 3.6 Hz, 1H), 1.98-1.88 (m, 1H), 1.82-1.73 (m, 1H), 1.68-1.59 (m, 1H);  $^{13}\text{C-NMR}$  (100 MHz,  $\text{CDCl}_3$ )  $\delta$  137.9, 133.7 (q,  $^2J_{\text{C-F}}$  = 31.0 Hz), 128.9, 128.6 (q,  $^3J_{\text{C-F}}$  = 4.2 Hz), 124.3 (q,  $^1J_{\text{C-F}}$  = 272.1 Hz), 115.0, 71.6, 61.9, 35.6, 31.6, 29.1;  $^{19}\text{F-NMR}$  (377 MHz,  $\text{CDCl}_3$ )  $\delta$  -59.40; IR (neat)  $\nu$  = 3080, 2926, 1295, 1132  $\text{cm}^{-1}$ ; HRMS (EI)  $m/z$  Calcd for  $\text{C}_{15}\text{H}_{15}^{11}\text{BF}_6\text{O}_2$   $[\text{M}]^+$  352.1069, found 352.1098.

**3-(2-(2,6-Bis(trifluoromethyl)phenyl)-1,3,2-dioxaborinan-4-yl)propyl acetate (3d)**

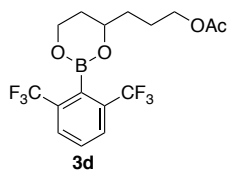

96% yield, Data for **3d**: colorless oil;  $R_f$  0.81 (2/1 *n*-hexane/EtOAc);  $^1\text{H-NMR}$  (400 MHz,  $\text{CDCl}_3$ )  $\delta$  7.78 (d,  $J$  = 8.0 Hz, 2H), 7.56 (t,  $J$  = 8.0, 1H), 4.21-4.07 (m, 5H), 2.03 (s, 3H), 2.05-2.00 (m, 1H), 1.97-1.60 (m, 5H);  $^{13}\text{C-NMR}$  (100 MHz,  $\text{CDCl}_3$ )  $\delta$  171.1, 133.7 (q,  $J_2$  = 31.1 Hz), 128.9, 128.6 (q,  $J_3$  = 3.1 Hz), 124.3 (q,  $J_1$  = 272.0 Hz), 71.8, 64.2, 61.9, 33.0, 31.8, 24.2, 20.9;  $^{19}\text{F-NMR}$  (377 MHz,  $\text{CDCl}_3$ )  $\delta$  -59.39; IR (neat)  $\nu$  = 2960, 2923, 2891, 2850, 1740, 1577, 1487, 1433, 1368, 1344, 1296, 1243, 1199, 1177, 1132, 1089, 1069, 818  $\text{cm}^{-1}$ ; HRMS (ESI)  $m/z$  Calcd for  $\text{C}_{16}\text{H}_{17}\text{BF}_6\text{O}_4\text{Na}$   $[\text{M}+\text{Na}]^+$  421.1022, found 421.1028.

**4-(3-(Benzyloxy)propyl)-2-(2,6-bis(trifluoromethyl)phenyl)-1,3,2-dioxaborinane (3e)**

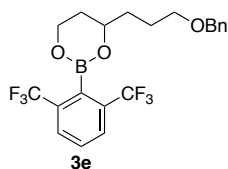

97% yield, Data for **3e**: yellow oil;  $R_f$  0.45 (9/1 *n*-hexane/EtOAc);  $^1\text{H-NMR}$  (400 MHz,  $\text{CDCl}_3$ )  $\delta$  7.79 (d,  $J$  = 7.9 Hz, 2H), 7.56 (t,  $J$  = 7.9 Hz, 1H), 7.37-7.25 (m, 5H), 4.50 (s, 2H), 4.21-4.07 (m, 3H), 3.56-3.47 (m, 2H), 2.04 (dq,  $J$  = 14.1, 3.6 Hz, 1H), 1.97-1.88 (m, 1H), 1.86-1.68 (m, 4H);  $^{13}\text{C-NMR}$  (100 MHz,  $\text{CDCl}_3$ )  $\delta$  138.6, 133.7 (q,  $^2J_{\text{C-F}}$  = 31.2 Hz), 128.9, 128.5 (q,  $^3J_{\text{C-F}}$  = 4.2 Hz), 128.3, 127.6, 127.5, 124.3 (q,  $^1J_{\text{C-F}}$  = 272.6 Hz), 72.8, 72.1, 70.0, 61.9, 33.2, 31.7, 25.2;  $^{19}\text{F-NMR}$  (377 MHz,  $\text{CDCl}_3$ )  $\delta$  -59.39;  $^{11}\text{B-NMR}$  (128 MHz,  $\text{CDCl}_3$ )  $\delta$  27.94;  $^{11}\text{B-NMR}$  (128 MHz,  $\text{CD}_3\text{OD}/\text{D}_2\text{O}$  = 9:1)  $\delta$  27.93; IR (neat)  $\nu$  = 2922, 1295, 1130  $\text{cm}^{-1}$ ; HRMS (ESI)  $m/z$  Calcd for  $\text{C}_{21}\text{H}_{21}^{11}\text{BF}_6\text{O}_3\text{Na}$   $[\text{M}+\text{Na}]^+$  469.1386, found 469.1375.

**(4*R*,5*R*)-2-(2,6-Bis(trifluoromethyl)phenyl)-4,5-diphenyl-1,3,2-dioxaborolane (3f)**

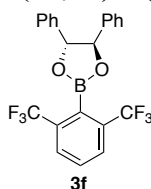

83% yield, Data for **3f**: yellow solid;  $R_f$  0.38 (20/1 *n*-hexane/EtOAc); mp 97-100  $^{\circ}\text{C}$ ;  $^1\text{H-NMR}$  (400 MHz,  $\text{CDCl}_3$ )  $\delta$  7.93 (d,  $J$  = 8.0 Hz, 2H), 7.71 (t,  $J$  = 8.0 Hz, 1H), 7.45-7.35 (m, 10H), 5.40 (s, 2H);  $^{13}\text{C-NMR}$  (100 MHz,  $\text{CDCl}_3$ )  $\delta$  138.4, 134.7 (q,  $^2J_{\text{C-F}}$  = 31.4 Hz), 130.2, 128.8, 128.8 (q,  $^3J_{\text{C-F}}$  = 4.2 Hz), 128.6, 126.2, 124.2 (q,  $^1J_{\text{C-F}}$  = 272.6 Hz), 88.0;  $^{19}\text{F-NMR}$  (377 MHz,  $\text{CDCl}_3$ )  $\delta$  -59.42; IR (KBr)  $\nu$  = 3036, 2908, 1300, 1130  $\text{cm}^{-1}$ ; HRMS (EI)  $m/z$  Calcd for  $\text{C}_{22}\text{H}_{15}\text{BF}_6\text{O}_2$   $[\text{M}]^+$  436.1069, found 436.1067.

**(3*aR*,7*aS*)-2-(2,6-Bis(trifluoromethyl)phenyl)hexahydrobenzo[*d*][1,3,2]dioxaborole (3g)**

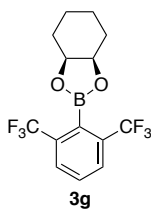

90% yield, Data for **3g**: yellow oil;  $R_f$  0.31 (20/1 *n*-hexane/EtOAc);  $^1\text{H-NMR}$  (400 MHz,  $\text{CDCl}_3$ )  $\delta$  7.83 (d,  $J$  = 7.9 Hz, 2H), 7.63 (t,  $J$  = 7.9 Hz, 1H), 4.61-4.56 (m, 2H), 1.91-1.89 (m, 4H), 1.69-1.58 (m, 2H), 1.43-1.33 (m, 2H);  $^{13}\text{C-NMR}$  (100 MHz,  $\text{CDCl}_3$ )  $\delta$  134.6 (q,  $^2J_{\text{C-F}}$  = 31.4 Hz), 129.7, 128.6 (q,  $^3J_{\text{C-F}}$  = 4.4 Hz), 124.0 (q,  $^1J_{\text{C-F}}$  = 272.7 Hz), 76.6, 28.2, 19.7;  $^{19}\text{F-NMR}$  (377 MHz,  $\text{CDCl}_3$ )  $\delta$  -59.79; IR (neat)  $\nu$  = 3420, 2942, 1297, 1132  $\text{cm}^{-1}$ ; HRMS (EI)  $m/z$  Calcd for  $\text{C}_{14}\text{H}_{13}^{11}\text{BF}_6\text{O}_2$   $[\text{M}]^+$  338.0913, found 338.0919.

**(3aR,6aS)-2-(2,6-Bis(trifluoromethyl)phenyl)tetrahydro-4H-cyclopenta[d][1,3,2]dioxaborole**

**(3h)**

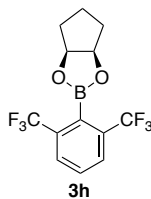

90% yield, Data for **3h**: yellow oil;  $R_f$  0.44 (20/1 *n*-hexane/EtOAc);  $^1\text{H-NMR}$  (400 MHz,  $\text{CDCl}_3$ )  $\delta$  7.83 (d,  $J$  = 8.0 Hz, 2H), 7.62 (t,  $J$  = 8.0 Hz, 1H), 5.07-5.03 (m, 2H), 2.08-2.02 (m, 2H), 1.96-1.86 (m, 1H), 1.76-1.64 (m, 3H);  $^{13}\text{C-NMR}$  (100 MHz,  $\text{CDCl}_3$ )  $\delta$  134.6 (q,  $^2J_{\text{C-F}}$  = 31.4 Hz), 129.7, 128.6, (q,  $^3J_{\text{C-F}}$  = 4.3 Hz), 123.9 (q,  $^1J_{\text{C-F}}$  = 272.6 Hz), 84.1, 34.1, 21.7;  $^{19}\text{F-NMR}$  (377 MHz,  $\text{CDCl}_3$ )  $\delta$  -59.84; IR (neat)  $\nu$  = 2967, 1298, 1132  $\text{cm}^{-1}$ ; HRMS (EI)  $m/z$  Calcd for  $\text{C}_{13}\text{H}_{11}^{11}\text{BF}_6\text{O}_2$   $[\text{M}]^+$  324.0756, found 324.0748.

**(3aR,9aS)-2-(2,6-Bis(trifluoromethyl)phenyl)octahydrocycloocta[d][1,3,2]dioxaborole (3i)**

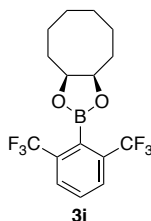

90%, yield, Data for **3i**: yellow solid;  $R_f$  0.41 (20/1 *n*-hexane/EtOAc); mp 64-66  $^\circ\text{C}$ ;  $^1\text{H-NMR}$  (400 MHz,  $\text{CDCl}_3$ )  $\delta$  7.83 (d,  $J$  = 8.0 Hz, 2H), 7.62 (t,  $J$  = 8.0 Hz, 1H), 4.65-4.59 (m, 2H), 2.12-2.02 (m, 2H), 1.96-1.90 (m, 2H), 1.72-1.65 (m, 2H), 1.56-1.26 (m, 6H);  $^{13}\text{C-NMR}$  (100 MHz,  $\text{CDCl}_3$ )  $\delta$  134.6 (q,  $^2J_{\text{C-F}}$  = 31.4 Hz), 129.7, 129.0 (q,  $^3J_{\text{C-F}}$  = 4.4 Hz), 124.0 (q,  $^1J_{\text{C-F}}$  = 272.6 Hz), 82.4, 29.0, 27.0, 25.6;  $^{19}\text{F-NMR}$  (377 MHz,  $\text{CDCl}_3$ )  $\delta$  -59.77; IR (KBr)  $\nu$  = 2934, 1300, 1133  $\text{cm}^{-1}$ ; HRMS (EI)  $m/z$  Calcd for  $\text{C}_{16}\text{H}_{17}^{11}\text{BF}_6\text{O}_2$   $[\text{M}]^+$  366.1226, found  $m/z$ : 366.1239.

**2-(2,6-Bis(trifluoromethyl)phenyl)-4H-benzo[d][1,3,2]dioxaborinine (3j)**

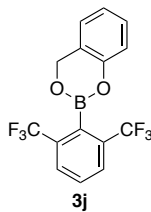

84% yield, Data for **3j**: yellow oil;  $R_f$  0.41 (20/1 *n*-hexane/EtOAc);  $^1\text{H-NMR}$  (400 MHz,  $\text{CDCl}_3$ )  $\delta$  7.87 (d,  $J$  = 8.0 Hz, 2H), 7.66 (t,  $J$  = 8.0 Hz, 1H), 7.28-7.24 (m, 1H), 7.10 (dt,  $J$  = 7.6, 1.2 Hz, 1H), 7.04-7.01 (m, 2H), 5.26 (s, 2H);  $^{13}\text{C-NMR}$  (100 MHz,  $\text{CDCl}_3$ )  $\delta$  148.8, 134.1 (q,  $^2J_{\text{C-F}}$  = 31.4 Hz), 129.7, 129.0, 128.8 (q,  $^3J_{\text{C-F}}$  = 4.2 Hz), 124.9, 124.2 (q,  $^1J_{\text{C-F}}$  = 272.4 Hz), 123.7, 122.2, 117.9, 63.6;  $^{19}\text{F-NMR}$  (377 MHz,  $\text{CDCl}_3$ )  $\delta$  -59.74; IR (neat)  $\nu$  = 3050, 2905, 1297, 1169  $\text{cm}^{-1}$ ; HRMS (EI)  $m/z$  Calcd for  $\text{C}_{15}\text{H}_9^{11}\text{BF}_6\text{O}_2$   $[\text{M}]^+$  346.0600, found 346.0599.

**3-(2-(2,6-Bis(trifluoromethyl)phenyl)-1,3,2-dioxaborinan-4-yl)propan-1-ol (3k)**

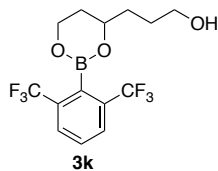

77% yield, Data for **3k**: yellow oil;  $R_f$  0.16 (4/1 *n*-hexane/EtOAc);  $^1\text{H-NMR}$  (400 MHz,  $\text{CDCl}_3$ )  $\delta$  7.78 (d,  $J$  = 8.0 Hz, 2H), 7.56 (t,  $J$  = 8.0 Hz, 1H), 4.21-4.08 (m, 3H), 3.67-3.64 (m, 2H), 2.06-1.89 (m, 2H), 1.78-1.64 (m, 5H);  $^{13}\text{C-NMR}$  (100 MHz,  $\text{CDCl}_3$ )  $\delta$  133.7 (q,  $J_2$  = 31.2 Hz), 128.96, 128.6 (q,  $J_3$  = 4.3 Hz), 124.3 (q,  $J_1$  = 272.1 Hz), 72.3, 62.6, 62.0, 33.0, 31.8, 28.40;  $^{19}\text{F-NMR}$  (377 MHz,  $\text{CDCl}_3$ )  $\delta$  -59.38; IR (neat)  $\nu$  = 2952, 2927, 2872, 2840, 1488, 1431, 1343, 1295, 1197, 1168, 1131, 1088, 1066, 812  $\text{cm}^{-1}$ ; HRMS (ESI)  $m/z$  Calcd for  $\text{C}_{14}\text{H}_{15}^{11}\text{BF}_6\text{O}_3\text{Na}$   $[\text{M}+\text{Na}]^+$  379.0916, found 379.0918.

**Preparation of 4-(3-(benzyloxy)propyl)-2-(2,6-bis(trifluoromethyl)phenyl)-1,3,2-dioxaborinane (3e) on a 3 mmol scale**

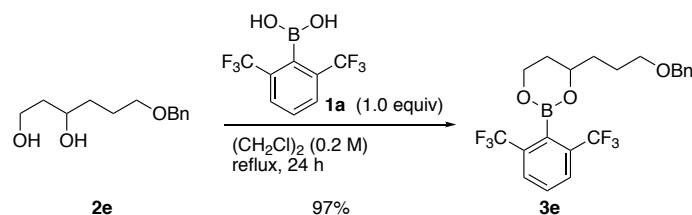

To a solution of **2e** (674 mg, 3.00 mmol, 1.0 equiv) in  $\text{ClCH}_2\text{CH}_2\text{Cl}$  (15 mL, 0.20 M) was added **1a** (776 mg, 3.00 mmol, 1.0 equiv). After stirring for 24 h at reflux, the reaction mixture was concentrated under reduced pressure to furnish the crude product, which was purified by silica gel column chromatography (*n*-hexane : EtOAc = 9 : 1) to give **3e** (1.30 g, 2.91 mmol, 97% yield) as a yellow oil.

**Table S1.** Formation of cyclic boronic esters between *o*-FXylB(OH)<sub>2</sub> and different diols.

| $\text{HO}-\text{CH}_2(\text{CH}_2)_n-\text{OH}$<br><b>2a–k</b> |                                                                                                                                    | $\xrightarrow[\text{(CH}_2\text{Cl}_2)_2 (0.2 \text{ M}), \text{ temp.}, 24 \text{ h}]{\text{o-FXylBA (1a) (1.0 equiv)}}$<br>$\text{Ar} = 2,6\text{-(CF}_3)_2\text{C}_6\text{H}_3$ | $\text{O}-\text{CH}_2(\text{CH}_2)_n-\text{O}$<br><b>3a–k</b> | $\text{o-FXylBA (1a)}$                             |
|-----------------------------------------------------------------|------------------------------------------------------------------------------------------------------------------------------------|------------------------------------------------------------------------------------------------------------------------------------------------------------------------------------|---------------------------------------------------------------|----------------------------------------------------|
| <br><b>3a</b>                                                   | <br><b>3b</b>                                                                                                                      | <br><b>3c</b>                                                                                                                                                                      | <br><b>3d</b>                                                 | <br><b>3e</b>                                      |
| 100% <sup>a</sup> (rt)<br>80% <sup>b</sup> (reflux)             | 58% <sup>a</sup> (rt)<br>68% <sup>c</sup> (rt with MS4 Å)<br>80% <sup>b</sup> (reflux)                                             | 89% <sup>a</sup> (rt)<br>99% <sup>b</sup> (reflux)                                                                                                                                 | 91% <sup>a</sup> (rt)<br>96% <sup>b</sup> (reflux)            | 84% <sup>a</sup> (rt)<br>97% <sup>b</sup> (reflux) |
| <br><b>3f</b>                                                   | <br><b>3g</b>                                                                                                                      | <br><b>3i</b>                                                                                                                                                                      | <br><b>3j</b>                                                 | <br><b>3k</b>                                      |
| 4% <sup>a</sup> (rt)<br>83% <sup>b</sup> (reflux)               | n = 2: 69% <sup>a</sup> (rt)<br>90% <sup>b</sup> (reflux)<br>n = 1: <b>3h</b><br>9% <sup>a</sup> (rt)<br>90% <sup>b</sup> (reflux) | 19% <sup>a</sup> (rt)<br>90% <sup>b</sup> (reflux)                                                                                                                                 | 75% <sup>a</sup> (rt)<br>84% <sup>b</sup> (reflux)            | 77% <sup>d</sup>                                   |

<sup>a</sup> Determined by <sup>1</sup>H-NMR analysis of crude mixture.

<sup>b</sup> Isolated yield.

<sup>c</sup> Performed with MS4 Å (1 g/mol)

<sup>d</sup> Reaction time 60 h.

**5. Experimental procedures for the chemical transformation of 2,6-bis(trifluoromethyl)-phenylboronic esters**

**3-(2-(2,6-Bis(trifluoromethyl)phenyl)-1,3,2-dioxaborinan-4-yl)propyl acetate (3d)**

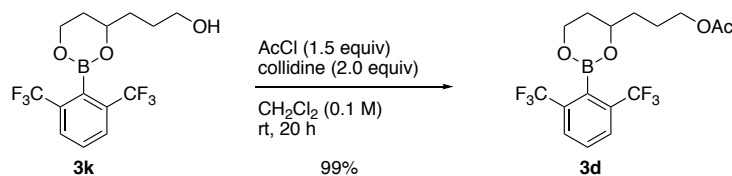



To a stirred solution of **3k** (100 mg, 0.280 mmol) and 2,4,6-trimethylpyridine (74.0  $\mu$ L, 0.560 mmol, 2.0 equiv) in  $\text{CH}_2\text{Cl}_2$  (3.0 mL, 0.093 M) at room temperature was added acetyl chloride (30.0  $\mu$ L, 0.420 mmol, 1.5 equiv). After stirring for 20 h, the reaction was quenched by adding 1 M aqueous HCl. The resulting mixture was extracted with  $\text{CH}_2\text{Cl}_2$  (2 x 10 mL). The combined organic layer was washed with brine (20 mL), and dried over  $\text{Na}_2\text{SO}_4$ . Filtration and concentration under reduced pressure furnished the crude product, which was purified by silica gel column chromatography (*n*-hexane : EtOAc = 9 : 1) to give **3d** (110 mg, 0.276 mmol, 99% yield) as a colorless oil.

### 3-(2-(2,6-Bis(trifluoromethyl)phenyl)-1,3,2-dioxaborinan-4-yl)propan-1-ol (**3k**)

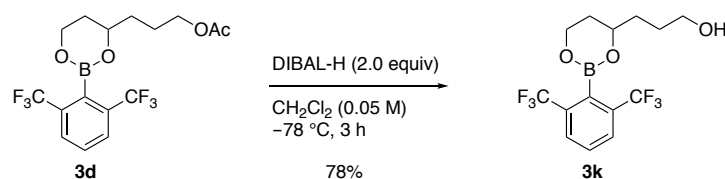

To a stirred solution of **3d** (43.8 mg, 0.110 mmol) in  $\text{CH}_2\text{Cl}_2$  (2.0 mL, 0.055 M) at  $-78^\circ\text{C}$  was added dropwise a solution of DIBAL-H in hexane (1.03 M in hexane, 0.22 mL, 0.220 mmol, 2.0 equiv). After stirring for 3 h at  $-78^\circ\text{C}$ , the reaction was quenched by adding EtOAc (2.0 mL). A saturated aqueous solution of potassium sodium tartrate (6 mL) was added to the resulting mixture. After stirring for 10 min, saturated aqueous  $\text{NH}_4\text{Cl}$  was added. The resulting mixture was extracted with EtOAc (3 x 15 mL). The combined organic layer was washed successively with  $\text{H}_2\text{O}$  (30 mL) and brine (30 mL), and dried over  $\text{Na}_2\text{SO}_4$ . Filtration and concentration under reduced pressure furnished the crude product, which was purified by silica gel column chromatography (*n*-hexane : EtOAc = 1 : 1) to give **3k** (30.7 mg, 0.0862 mmol, 78% yield) as a yellow oil.

### 4-(3-(Benzyloxy)propyl)-2-(2,6-bis(trifluoromethyl)phenyl)-1,3,2-dioxaborinane (**3e**)

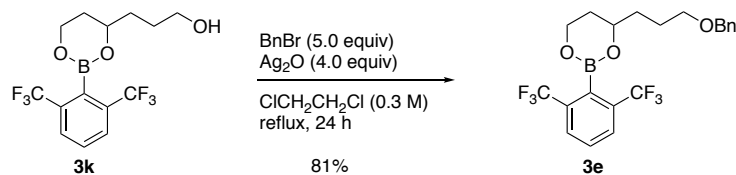

To a stirred suspension of **3k** (356 mg, 1.00 mmol) and  $\text{Ag}_2\text{O}$  (927 mg, 4.00 mmol) in  $(\text{CH}_2\text{Cl})_2$  (3.0 mL, 0.33 M) at room temperature was added benzyl bromide (0.60 mL, 5.00 mmol, 5.0 equiv). After stirring for 20 h at reflux, the reaction mixture was filtrated through Celite pad and rinsed with  $\text{CH}_2\text{Cl}_2$  (20 mL). Concentration under reduced pressure furnished the crude product, which was purified by silica gel column chromatography (*n*-hexane : EtOAc = 9 : 1) to give **3e** (362 mg, 0.812 mmol, 81% yield) as a yellow oil.

### 3-(2-(2,6-Bis(trifluoromethyl)phenyl)-1,3,2-dioxaborinan-4-yl)propan-1-ol (**3k**)

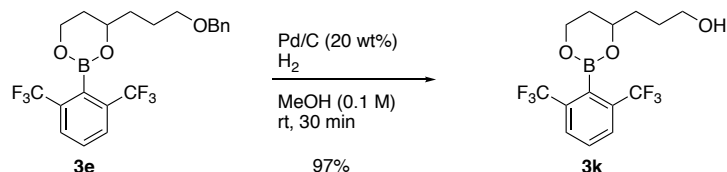

A mixture of 10% Pd/C (16.0 mg, 20 wt%) and **3e** (79.0 mg, 0.180 mmol) in MeOH (2.0 mL, 0.090 M) was stirred for 30 min at room temperature under H<sub>2</sub> atmosphere (balloon). The reaction mixture was filtrated through Celite pad and rinsed with CH<sub>2</sub>Cl<sub>2</sub> (20 mL). Concentration under reduced pressure furnished the crude product, which was purified by silica gel column chromatography (*n*-hexane : EtOAc = 9 : 1) to give **3k** (62.2 mg, 0.175 mmol, 97% yield) as a yellow oil.

### (3-(2-(2,6-Bis(trifluoromethyl)phenyl)-1,3,2-dioxaborinan-4-yl)propoxyl)triethylsilane (**4**)

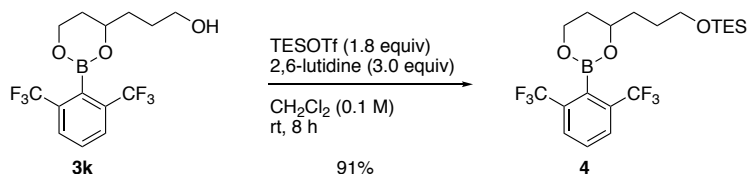

To a stirred solution of **3k** (71.2 mg, 0.200 mmol) and 2,6-lutidine (47.0 μL, 0.400 mmol, 3.0 equiv) in CH<sub>2</sub>Cl<sub>2</sub> (2.0 mL, 0.10 M) at room temperature was added dropwise TESOTf (54.0 μL, 0.240 mmol, 1.8 equiv). After stirring for 8 h, the reaction was quenched by adding saturated aqueous NH<sub>4</sub>Cl (2.0 mL). The resulting mixture was extracted with CH<sub>2</sub>Cl<sub>2</sub> (2 x 10 mL). The combined organic layer was washed with brine (20 mL), and dried over Na<sub>2</sub>SO<sub>4</sub>. Filtration and concentration under reduced pressure furnished the crude product, which was purified by silica gel column chromatography (*n*-hexane : EtOAc = 19 : 1) to give **4** (85.5 mg, 0.182 mmol, 91% yield) as a colorless oil.

Data for **4**: colorless oil; *R*<sub>f</sub> 0.35 (20/1 *n*-hexane/EtOAc); <sup>1</sup>H-NMR (400 MHz, CDCl<sub>3</sub>) δ 7.84 (d, *J* = 8.0 Hz, 2H), 7.56 (t, *J* = 8.0 Hz, 1H), 4.21-4.08 (m, 3H), 3.69-3.59 (m, 2H), 2.05 (dq, *J* = 14.2, 3.6 Hz, 1H), 1.97-1.87 (m, 1H), 1.73-1.57 (m, 4H), 0.94 (t, *J* = 8.1 Hz, 9H), 0.58 (q, *J* = 8.1 Hz, 6H); <sup>13</sup>C-NMR (100 MHz, CDCl<sub>3</sub>) δ 133.7 (q, <sup>2</sup>*J*<sub>C-F</sub> = 31.0 Hz), 128.9, 128.5 (q, <sup>3</sup>*J*<sub>C-F</sub> = 4.4 Hz), 124.3 (q, <sup>1</sup>*J*<sub>C-F</sub> = 272.8 Hz), 72.2, 62.6, 61.9, 32.9, 31.7, 28.3, 6.7, 4.4; <sup>19</sup>F-NMR (377 MHz, CDCl<sub>3</sub>) δ -59.41; IR (neat) ν = 2956, 1297, 1135 cm<sup>-1</sup>; HRMS (EI) *m/z* calcd for C<sub>20</sub>H<sub>30</sub><sup>11</sup>BO<sub>3</sub>F<sub>6</sub>Si [M]<sup>+</sup> 471.1961, found 471.1956.

### 3-(2-(2,6-Bis(trifluoromethyl)phenyl)-1,3,2-dioxaborinan-4-yl)propan-1-ol (**3k**)

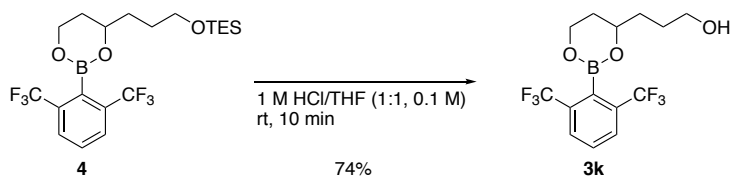

A solution of **4** (47.0 mg, 0.100 mmol) in 1 M aqueous HCl / THF (1.0 mL, 1 M aqueous HCl : THF = 1 : 1) was stirred for 10 min at room temperature. The reaction mixture was extracted with CH<sub>2</sub>Cl<sub>2</sub>, (2 x 2.0 mL). The combined organic layer was washed with brine (5.0 mL), and dried over Na<sub>2</sub>SO<sub>4</sub>. Filtration and concentration under reduced pressure furnished the crude product, which was purified by silica gel column chromatography (*n*-hexane : EtOAc = 2 : 1) to give **3k** (26.0 mg, 0.0740 mmol, 74% yield) as a yellow oil.

### 3-(2-(2,6-Bis(trifluoromethyl)phenyl)-1,3,2-dioxaborinan-4-yl)propanal (**5**)

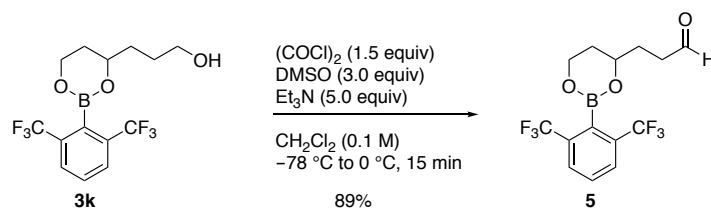

To a stirred solution of oxalyl chloride (128  $\mu$ L, 1.50 mmol, 1.5 equiv) in CH<sub>2</sub>Cl<sub>2</sub> (5.0 mL) at –78 °C was added dropwise DMSO (180  $\mu$ L, 3.00 mmol, 3.0 equiv) dropwise over 5 min. The mixture was stirred for 10 min at –78 °C and a solution of **3k** (356 mg, 1.00 mmol) in CH<sub>2</sub>Cl<sub>2</sub> (5.0 mL) was added dropwise. After stirring for 20 min, Et<sub>3</sub>N (696  $\mu$ L, 5.00 mmol, 5.0 equiv) was added dropwise at –78 °C. After the mixture was stirred at 0 °C for 15 min, the reaction was quenched by adding saturated aqueous NH<sub>4</sub>Cl (10 mL). The resulting mixture was extracted with CH<sub>2</sub>Cl<sub>2</sub> (2 x 10 mL). The combined organic layer was washed with brine (20 mL), and dried over Na<sub>2</sub>SO<sub>4</sub>. Filtration and concentration under reduced pressure furnished the crude product, which was purified by silica gel column chromatography (*n*-hexane : EtOAc = 2 : 1) to give **5** (85.5 mg, 0.182 mmol, 89% yield) as a colorless oil.

Data for **5**: colorless oil; *R*<sub>f</sub> 0.43 (4/1 *n*-hexane/EtOAc); <sup>1</sup>H-NMR (400 MHz, CDCl<sub>3</sub>)  $\delta$  9.79 (t, *J* = 1.2 Hz, 1H), 7.79 (d, *J* = 8.0 Hz, 2H), 7.57 (t, *J* = 8.0 Hz, 1H), 4.22–4.09 (m, 3H), 2.72–2.58 (m, 2H), 2.08–1.80 (m, 4H); <sup>13</sup>C-NMR (100 MHz, CDCl<sub>3</sub>)  $\delta$  201.8, 133.7 (q, <sup>2</sup>*J*<sub>C-F</sub> = 31.0 Hz), 129.0, 128.59 (q, <sup>3</sup>*J*<sub>C-F</sub> = 4.2 Hz), 124.29 (q, <sup>1</sup>*J*<sub>C-F</sub> = 272.7 Hz), 71.3, 61.9, 39.5, 31.8, 28.7; <sup>19</sup>F-NMR (377 MHz, CDCl<sub>3</sub>)  $\delta$  –59.38; IR (neat)  $\nu$  = 2953, 2927, 1725, 1577, 1487, 1431, 1344, 1295, 1200, 1168, 1131, 1987, 1068, 818 cm<sup>–1</sup>; HRMS (ESI) *m/z* calcd for C<sub>14</sub>H<sub>13</sub><sup>11</sup>BF<sub>6</sub>O<sub>3</sub>Na [M+Na]<sup>+</sup> 377.0760, found 377.0749.

### 3-(2-(2,6-Bis(trifluoromethyl)phenyl)-1,3,2-dioxaborinan-4-yl)propanal (**5**)

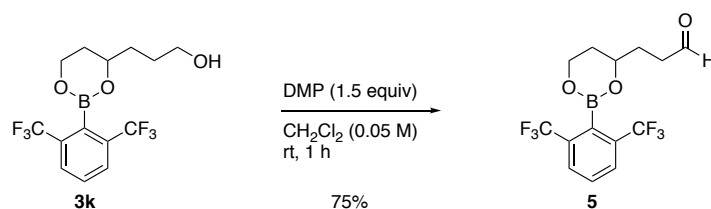

To a stirred solution of Dess–Martin periodinane (68.2 mg, 0.161 mmol, 1.5 equiv) in CH<sub>2</sub>Cl<sub>2</sub>

(1.0 mL, total 0.050 M) at room temperature was added a solution of **3k** (38.2 mg, 0.107 mmol) in  $\text{CH}_2\text{Cl}_2$  (1.0 mL). After stirring for 1 h, the reaction was quenched by successively adding saturated aqueous  $\text{Na}_2\text{S}_2\text{O}_3$  (1.0 mL) and saturated aqueous  $\text{NaHCO}_3$  (1.0 mL). After stirring for 30 min, the resulting mixture was extracted with EtOAc (5.0 mL). The combined organic layer was washed with brine (5.0 mL), and dried over  $\text{Na}_2\text{SO}_4$ . Filtration and concentration under reduced pressure furnished the crude product, which was purified by silica gel column chromatography (*n*-hexane : EtOAc = 4 : 1) to give **5** (25.4 mg, 0.0717 mmol, 75% yield) as a colorless oil.

### 3-(2-(2,6-Bis(trifluoromethyl)phenyl)-1,3,2-dioxaborinan-4-yl)propan-1-ol (**3k**)

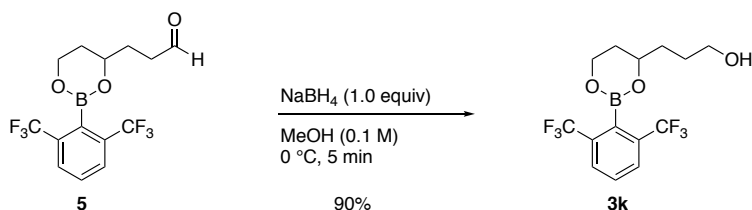

To a stirred solution of **5** (35.4 mg, 0.100 mmol) in MeOH (1.0 mL, 0.10 M) at 0 °C was added  $\text{NaBH}_4$  (3.78 mg, 0.100 mmol, 1.0 equiv). After stirring for 5 min, the reaction was quenched by adding saturated aqueous  $\text{NH}_4\text{Cl}$  (1.0 mL). The resulting mixture was extracted with EtOAc (5.0 mL). The organic layer was washed with brine (5.0 mL), and dried over  $\text{Na}_2\text{SO}_4$ . Filtration and concentration under reduced pressure furnished the crude product, which was purified by silica gel column chromatography (*n*-hexane : EtOAc = 2 : 1) to give **3k** (32.0 mg, 0.0900 mmol, 90% yield) as a yellow oil.

### 3-(2-(2,6-Bis(trifluoromethyl)phenyl)-1,3,2-dioxaborinan-4-yl)-1-phenylpropan-1-ol (**6**)

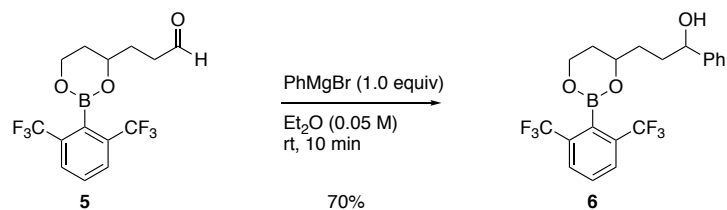

To a stirred solution of **5** (35.4 mg, 0.100 mmol) in  $\text{Et}_2\text{O}$  (2.0 mL, 0.050 M) at room temperature was added dropwise a solution of  $\text{PhMgBr}$  in  $\text{Et}_2\text{O}$  (0.70 M in  $\text{Et}_2\text{O}$ , 140  $\mu\text{L}$ , 0.098 mmol, 1.0 equiv). After stirring for 10 min, the reaction was quenched by adding saturated aqueous  $\text{NH}_4\text{Cl}$  (2.0 mL). The resulting mixture was extracted with EtOAc (3 x 5.0 mL). The combined organic layer was washed with brine (10 mL), and dried over  $\text{Na}_2\text{SO}_4$ . Filtration and concentration under reduced pressure furnished the crude product, which was purified by silica gel column chromatography (*n*-hexane : EtOAc = 5 : 1) to give **6** (30.4 mg, 0.0703 mmol, 70% yield) as a colorless oil.

Data for **6**: colorless oil;  $R_f$  0.51 (4/1 *n*-hexane/EtOAc);  $^1\text{H-NMR}$  (400 MHz,  $\text{CDCl}_3$ )  $\delta$  7.79 (d,  $J$  = 7.9 Hz, 2H), 7.56 (t,  $J$  = 7.9 Hz, 1H), 7.34-7.32 (m, 4H), 7.28-7.23 (m, 1H), 4.72-4.70 (m, 1H), 4.22-4.07 (m, 3H), 2.06-1.57 (m, 6H);  $^{13}\text{C-NMR}$  (100 MHz,  $\text{CDCl}_3$ )  $\delta$  144.54, 144.51, 133.70 (q,

$^2J_{\text{C-F}} = 31.0$  Hz), 133.69 (q,  $^2J_{\text{C-F}} = 31.0$  Hz), 128.94,, 128.93, 128.6 (q,  $^3J_{\text{C-F}} = 4.2$  Hz), 128.44,, 128.43, 127.5, 125.79, 125.76, 124.3 (q,  $^1J_{\text{C-F}} = 272.1$  Hz), 74.3, 74.1, 72.5, 72.2, 62.0, 61.9, 34.7, 34.5, 32.9, 32.7, 31.9, 31.8;  $^{19}\text{F}$ -NMR (377 MHz,  $\text{CDCl}_3$ )  $\delta$  -59.37; IR (neat)  $\nu = 3390, 2925, 1296, 1132$   $\text{cm}^{-1}$ ; HRMS (EI)  $m/z$  calcd for  $\text{C}_{20}\text{H}_{19}^{11}\text{BF}_6\text{O}_3$   $[\text{M}]^+$  432.1331, found 432.1337.

#### ***N*-Benzyl-3-(2-(2,6-bis(trifluoromethyl)phenyl)-1,3,2-dioxaborinan-4-yl)propan-1-amine (7)**

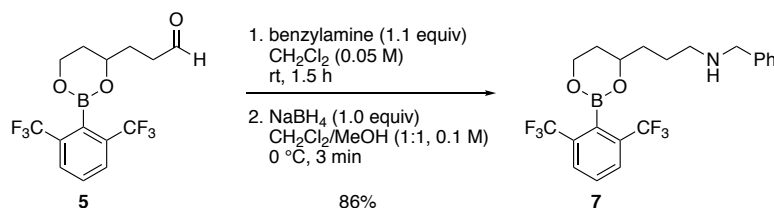

To a stirred solution of **5** (35.4 mg, 0.100 mmol) in  $\text{CH}_2\text{Cl}_2$  (0.50 mL, 0.20 M) at room temperature was added benzylamine (12.0  $\mu\text{L}$ , 0.110 mmol, 1.1 equiv). After stirring for 1 h, a solution of  $\text{NaBH}_4$  (3.78 mg, 0.100 mmol) in MeOH (0.5 mL) was added to the mixture at 0  $^\circ\text{C}$ . After stirring for 3 min, the reaction was quenched by adding saturated aqueous  $\text{NH}_4\text{Cl}$  (2.0 mL). The resulting mixture was extracted with  $\text{CH}_2\text{Cl}_2$  (3 x 5 mL). The combined organic layer was washed with brine (10 mL), and dried over  $\text{Na}_2\text{SO}_4$ . Filtration and concentration under reduced pressure furnished the crude product, which was purified by silica gel column chromatography ( $\text{CHCl}_3$  : MeOH = 19 : 1) to give **7** (38.2 mg, 0.0858 mmol, 86% yield) as a colorless oil.

Data for **7**: colorless oil;  $R_f$  0.32 (19/1  $\text{CHCl}_3/\text{MeOH}$ );  $^1\text{H}$ -NMR (400 MHz,  $\text{CDCl}_3$ )  $\delta$  7.79 (d,  $J = 7.9$  Hz, 2H), 7.56 (t,  $J = 7.9$  Hz, 1H), 7.22-7.37 (m, 5H), 4.20-4.07 (m, 3H), 3.78 (s, 2H), 3.01 (brs, 1H), 2.69-2.65 (m, 2H), 2.02 (dq,  $J = 14.3, 3.6$  Hz, 1H), 1.96-1.86 (m, 1H), 1.74-1.60 (m, 4H);  $^{13}\text{C}$ -NMR (100 MHz,  $\text{CDCl}_3$ )  $\delta$  (ppm) = 139.2, 133.7 (q,  $J_2 = 31.0$  Hz), 128.9, 128.6 (q,  $J_3 = 4.2$  Hz), 128.4, 128.3, 127.1, 124.3 (q,  $J_1 = 272.2$  Hz), 72.1, 61.9, 53.4, 48.6, 34.1, 31.7, 25.0;  $^{19}\text{F}$ -NMR (377 MHz,  $\text{CDCl}_3$ )  $\delta$  -59.38; IR (neat)  $\nu = 3341, 2925, 1296, 1131$   $\text{cm}^{-1}$ ; HRMS (ESI)  $m/z$  calcd for  $\text{C}_{21}\text{H}_{23}^{11}\text{BF}_6\text{NO}_2$   $[\text{M}+\text{H}]^+$  446.1724, found 446.1726.

#### **2-(2,6-Bis(trifluoromethyl)phenyl)-4-(but-3-en-1-yl)-1,3,2-dioxaborinane (3c)**

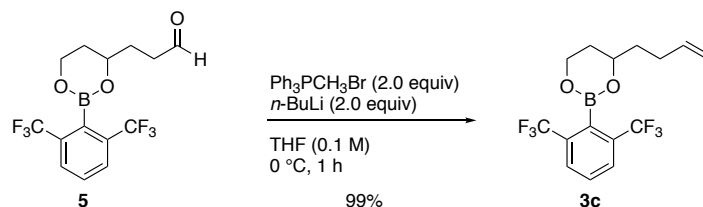

To a suspension of methyltriphenylphosphonium bromide (35.7 mg, 0.200 mmol, 2.0 equiv) in THF (0.70 mL) at 0  $^\circ\text{C}$  was added dropwise a solution of  $n\text{-BuLi}$  in hexane (1.6 M in hexane, 0.13 mL, 0.200 mmol, 2.0 equiv). After stirring for 20 min at 0  $^\circ\text{C}$ , a solution of **5** (35.4 mg, 0.100 mmol) in THF (0.30 mL, total, 0.17 M) was added. After stirring for 1 h at 0  $^\circ\text{C}$ , the reaction was diluted by adding  $\text{Et}_2\text{O}$  (2.0 mL). The resulting mixture was filtered through a Celite pad and dried

with Et<sub>2</sub>O (20 mL). Concentration under reduced pressure furnished the crude product, which was purified by silica gel column chromatography (*n*-hexane : EtOAc = 9 : 1) to give **3c** (35.2 mg, 0.100 mmol, 99% yield) as a yellow oil.

**Methyl (*E*)-5-(2-(2,6-bis(trifluoromethyl)phenyl)-1,3,2-dioxaborinan-4-yl)pent-2- enoate (**8**)**

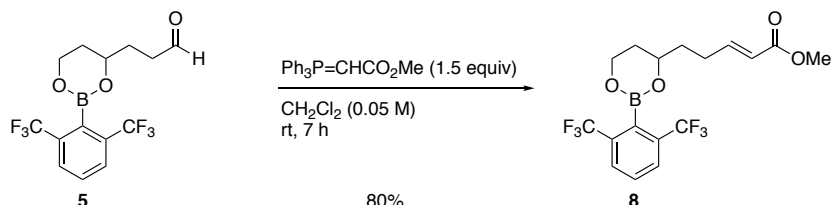

To a stirred solution of **5** (30.6 mg, 0.0864 mmol) in CH<sub>2</sub>Cl<sub>2</sub> (2.0 mL, 0.043 M) at 0 °C was added methyl (triphenylphosphoranylidene)acetate (50.4 mg, 0.130 mmol, 1.5 equiv). After stirring for 10 min at room temperature, the reaction was quenched by adding saturated aqueous NH<sub>4</sub>Cl (2.5 mL). The resulting mixture was extracted with CH<sub>2</sub>Cl<sub>2</sub> (2 x 5.0 mL). The combined organic layer was washed with brine (5.0 mL), and dried over Na<sub>2</sub>SO<sub>4</sub>. Filtration and concentration under reduced pressure furnished the crude product, which was purified by silica gel column chromatography (*n*-hexane : EtOAc = 4 : 1) give **8** (28.0 mg, 0.0757 mmol, 80% yield) as a colorless oil.

Data for **8**: colorless oil; *R<sub>f</sub>* 0.52 (4/1 *n*-hexane/EtOAc); <sup>1</sup>H-NMR (400 MHz, CDCl<sub>3</sub>) δ (ppm) 7.79 (d, *J* = 7.6 Hz, 2H), 7.57 (t, *J* = 7.6 Hz, 1H), 6.97 (dt, *J* = 15.6, 7.2 Hz, 1H), 5.84 (dt, *J* = 15.6, 1.6 Hz, 2H), 4.21-4.08 (m, 3H), 3.71 (s, 3H), 2.46-2.28 (m, 2H), 2.06-1.86 (m, 2H), 1.84-1.66 (m, 2H); <sup>13</sup>C-NMR (100 MHz, CDCl<sub>3</sub>) δ (ppm) = 167.0, 148.4, 133.7 (q, <sup>2</sup>*J*<sub>C-F</sub> = 31.0 Hz), 128.6 (q, <sup>3</sup>*J*<sub>C-F</sub> = 4.2 Hz), 124.30 (q, <sup>1</sup>*J*<sub>C-F</sub> = 272.0 Hz), 121.5, 71.3, 61.8, 51.4, 34.8, 31.7, 27.6; <sup>19</sup>F-NMR (377 MHz, CDCl<sub>3</sub>) δ -59.37; IR (neat) ν = 2952, 2920, 2847, 1725, 1652, 1578, 1488, 1436, 1343, 1295, 1199, 1167, 1131, 1081, 986, 819 cm<sup>-1</sup>; HRMS (ESI) *m/z* Calcd for C<sub>17</sub>H<sub>17</sub><sup>11</sup>BF<sub>6</sub>O<sub>4</sub>Na [M+Na]<sup>+</sup> 433.1022, found 433.1015.

**(*E*)-2-(2,6-Bis(trifluoromethyl)phenyl)-4-(4-iodobut-3-en-1-yl)-1,3,2-dioxaborinane (**9**)**

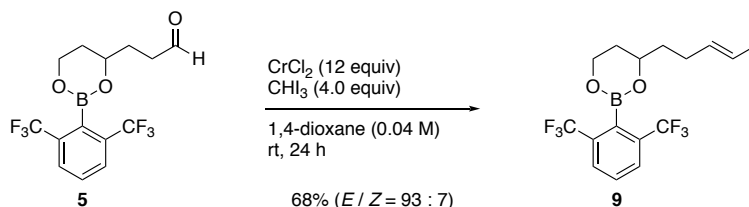

To a stirred solution of chromium (II) chloride (73.7 mg, 0.600 mmol, 6.0 equiv) in 1,4-dioxane (1.3 mL, total 0.40 M) at room temperature was added a solution of iodoform (78.7 mg, 0.200 mmol, 2.0 equiv) and **5** (35.4 mg, 0.100 mmol) in 1,4-dioxane (1.3 mL). After stirring for 5 h, chromium (II) chloride (73.7 mg, 0.600 mmol, 6.0 equiv) and iodoform (78.7 mg, 0.200 mmol, 2.0 equiv) were added to the reaction mixture. After stirring for 19 h, the reaction was quenched by



**Methyl 3-(2-(2,6-bis(trifluoromethyl)phenyl)-1,3,2-dioxaborinan-4-yl)propanoate (**11**)**

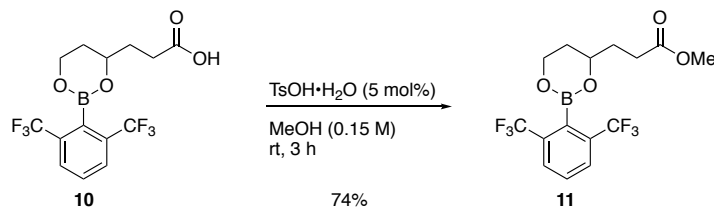

To a stirred solution of **10** (74.0 mg, 0.200 mmol) in MeOH (1.3 mL, 0.15 M) at room temperature was added *p*-toluenesulfonic acid monohydrate (1.90 mg, 0.0100 mmol, 5 mol%). After stirring for 3 h, the reaction was quenched by adding saturated aqueous NaHCO<sub>3</sub> (2.0 mL). The resulting mixture was extracted with EtOAc (2 x 5.0 mL). The combined organic layer was washed successively with saturated aqueous Na<sub>2</sub>S<sub>2</sub>O<sub>3</sub> (10 mL) and brine (10 mL), and dried over Na<sub>2</sub>SO<sub>4</sub>. Filtration and concentration under reduced pressure furnished the crude product, which was purified by silica gel column chromatography (*n*-hexane : EtOAc = 9 : 1) to give **11** (56.9 mg, 0.148 mmol, 74% yield) as a colorless oil.

Data for **11**: colorless oil; *R<sub>f</sub>* 0.33 (9/1 *n*-hexane/EtOAc); <sup>1</sup>H-NMR (400 MHz, CDCl<sub>3</sub>) δ 7.79 (d, *J* = 8.0 Hz, 2H), 7.57 (t, *J* = 8.0 Hz, 1H), 4.21-4.09 (m, 3H), 3.65 (s, 3H), 2.55-2.43 (m, 2H), 2.04 (dq, *J* = 14.0, 3.6 Hz, 1H), 2.00-1.85 (m, 3H); <sup>13</sup>C-NMR (100 MHz, CDCl<sub>3</sub>) δ 173.8, 133.7 (q, <sup>2</sup>*J*<sub>C-F</sub> = 36.9 Hz), 129.0, 128.6 (q, <sup>3</sup>*J*<sub>C-F</sub> = 4.4 Hz), 124.3 (q, <sup>1</sup>*J*<sub>C-F</sub> = 272.0 Hz), 71.2, 61.9, 51.6, 31.7, 31.5, 29.4; <sup>19</sup>F-NMR (377 MHz, CDCl<sub>3</sub>) δ -59.39; IR (neat) ν = 2957, 1740, 1296, 1131 cm<sup>-1</sup>; HRMS (EI) *m/z* calcd for C<sub>15</sub>H<sub>15</sub><sup>11</sup>BF<sub>6</sub>O<sub>4</sub> [M]<sup>+</sup> 384.0968, found 384.0973.

***N*-Benzyl-3-(2-(2,6-bis(trifluoromethyl)phenyl)-1,3,2-dioxaborinan-4-yl)propanamide (**12**)**

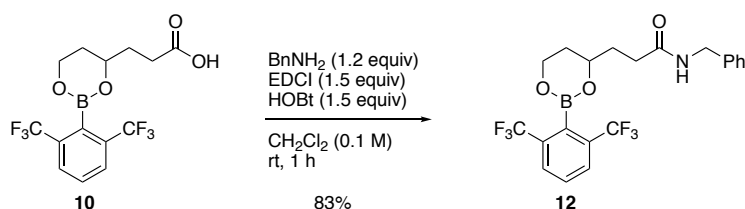

To a stirred solution of **10** (37.0 mg, 0.100 mmol) and benzylamine (13.1 μL, 0.120 mmol, 1.2 equiv) in CH<sub>2</sub>Cl<sub>2</sub> (1.0 mL, 0.10 M) at 0 °C was added EDCI (28.7 mg, 0.150 mmol, 1.5 equiv) and HOBt (20.3 mg, 0.150 mmol, 1.5 equiv). After stirring for 1 h at room temperature, the reaction was quenched by adding H<sub>2</sub>O (2.0 mL). The resulting mixture was extracted with CH<sub>2</sub>Cl<sub>2</sub> (2 x 5.0 mL). The combined organic layer washed with brine (10 mL), and dried over Na<sub>2</sub>SO<sub>4</sub>. Filtration and concentration under reduced pressure furnished the crude product, which was purified by silica gel column chromatography (*n*-hexane : EtOAc = 2 : 1) to give **12** (56.9 mg, 0.0828 mmol, 83% yield) as a colorless oil.

Data for **12**: colorless oil; *R<sub>f</sub>* 0.31 (2/1 *n*-hexane/EtOAc); <sup>1</sup>H-NMR (400 MHz, CDCl<sub>3</sub>) δ 7.78 (d, *J* = 8.0 Hz, 2H), 7.56 (t, *J* = 8.0 Hz, 1H), 7.33-7.23 (m, 5H), 5.85 (br, 1H), 4.41 (d, *J* = 5.6 Hz, 2H), 4.20-4.07 (m, 3H), 2.45-2.33 (m, 2H), 2.11-1.78 (m, 4H); <sup>13</sup>C-NMR (100 MHz, CDCl<sub>3</sub>) δ 172.3,



138.2, 133.7 (q,  $^2J_{\text{C-F}} = 31.0$  Hz), 129.0, 128.65, 128.56 (q,  $^3J_{\text{C-F}} = 4.4$  Hz), 127.7, 127.4, 124.3 (q,  $^1J_{\text{C-F}} = 272.1$  Hz), 71.4, 62.0, 43.6, 32.1, 31.9, 31.8;  $^{19}\text{F}$ -NMR (377 MHz,  $\text{CDCl}_3$ )  $\delta$  -59.35; IR (neat)  $\nu = 3299, 2925, 1650, 1296, 1130$   $\text{cm}^{-1}$ ; HRMS (EI)  $m/z$  calcd for  $\text{C}_{21}\text{H}_{20}^{11}\text{BF}_6\text{NO}_3$   $[\text{M}]^+$  459.1440, found 459.1433.

### 2-(2,6-Bis(trifluoromethyl)phenyl)-4-(2-(oxiran-2-yl)ethyl)-1,3,2-dioxaborinane (13)

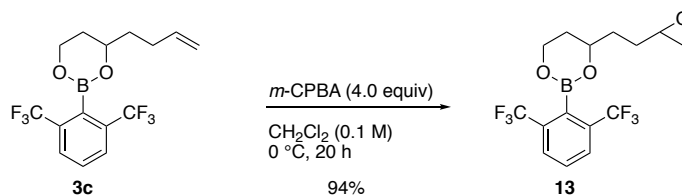

To a stirred solution of **3c** (45.0 mg, 0.130 mmol) in  $\text{CH}_2\text{Cl}_2$  (1.3 mL, 0.10 M) at  $0^\circ\text{C}$  was added 70% *m*-CPBA (126 mg, 0.520 mmol, 4.0 equiv). After stirring for 20 h at  $0^\circ\text{C}$ , the reaction was quenched by adding saturated aqueous  $\text{Na}_2\text{S}_2\text{O}_3$  (2.0 mL). The resulting mixture was extracted with  $\text{CH}_2\text{Cl}_2$  (2 x 5 mL). The combined organic layer was washed successively with saturated aqueous  $\text{NaHCO}_3$  (10 mL) and brine (10 mL), and dried over  $\text{Na}_2\text{SO}_4$ . Filtered and concentration under reduced pressure furnished the crude product, which was purified by silica gel column chromatography (*n*-hexane : EtOAc = 4 : 1) to give **13** (45.0 mg, 0.122 mmol, 94% yield) as a colorless oil.

Data for **13**: colorless oil;  $R_f$  0.49 (4/1 *n*-hexane/EtOAc);  $^1\text{H}$ -NMR (400 MHz,  $\text{CDCl}_3$ )  $\delta$  7.79 (d,  $J = 8.0$  Hz, 2H), 7.56 (t,  $J = 8.0$  Hz, 1H), 4.25-4.09 (m, 3H), 2.91-2.98 (m, 1H), 2.75-2.72 (m, 1H), 2.50-2.45 (m, 1H), 2.08-2.01 (m, 1H), 1.99-1.64 (m, 4H), 1.59-1.51 (m, 1H);  $^{13}\text{C}$ -NMR (100 MHz,  $\text{CDCl}_3$ )  $\delta$  133.7 (q,  $^2J_{\text{C-F}} = 31.0$  Hz), 128.9, 128.6 (q,  $^3J_{\text{C-F}} = 4.0$  Hz), 124.3 (q,  $^1J_{\text{C-F}} = 271.9$  Hz), 72.1, 71.5, 61.9, 61.8, 52.2, 51.7, 47.1, 47.0, 33.0, 32.5, 31.8, 31.7, 28.4, 27.6;  $^{19}\text{F}$ -NMR (377 MHz,  $\text{CDCl}_3$ )  $\delta$  -59.37, -59.38; IR (neat)  $\nu = 2926, 1433, 1296, 1131$   $\text{cm}^{-1}$ ; HRMS (EI)  $m/z$  calcd for  $\text{C}_{15}\text{H}_{15}^{11}\text{BF}_6\text{O}_3$   $[\text{M}]^+$  368.1018, found 368.1017.

### (*E*)-6-(2-(2,6-Bis(trifluoromethyl)phenyl)-1,3,2-dioxaborinan-4-yl)hex-3-en-2-one (14)

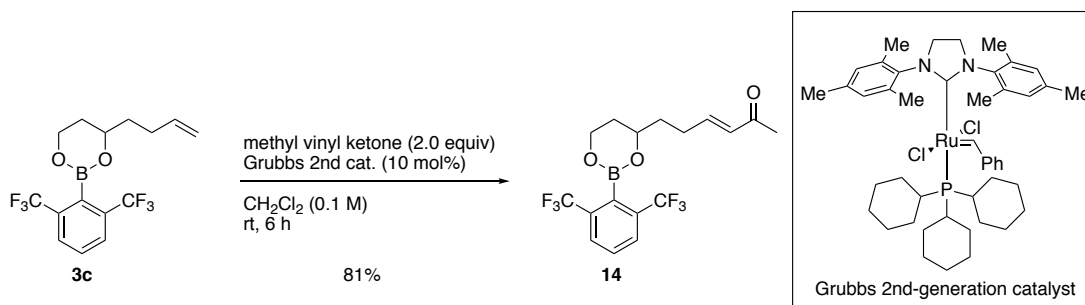

To a stirred solution of **3c** (35.2 mg, 0.100 mmol) and methyl vinyl ketone (16.0  $\mu\text{L}$ , 0.200 mmol, 2.0 equiv) in  $\text{CH}_2\text{Cl}_2$  (1.0 mL, 0.10 M) at room temperature was added Grubbs 2nd catalyst (4.24 mg, 0.00500 mmol, 10 mol%) was added. After stirring for 6 h, the reaction mixture was

concentrated under reduced pressure to give the crude product, which was purified by silica gel column chromatography (*n*-hexane : EtOAc = 9 : 1) to give **14** (32.1 mg, 0.0814 mmol, 81% yield) as a colorless oil.

Data for **14**: colorless oil;  $R_f$  0.24 (9/1 *n*-hexane/EtOAc);  $^1\text{H-NMR}$  (400 MHz,  $\text{CDCl}_3$ )  $\delta$  7.89 (d,  $J$  = 8.0 Hz, 2H), 7.57 (t,  $J$  = 8.0 Hz, 1H), 6.81 (dt,  $J$  = 16.0, 6.8 Hz, 1H), 6.09 (dt,  $J$  = 16.0, 1.6 Hz, 1H), 4.21-4.09 (m, 3H), 2.49-2.30 (m, 2H), 2.20 (s, 3H), 2.03 (dq,  $J$  = 14.0, 3.6 Hz, 1H), 2.06-1.89 (m, 1H), 1.85-1.68 (m, 2H);  $^{13}\text{C-NMR}$  (100 MHz,  $\text{CDCl}_3$ )  $\delta$  198.6, 147.3, 133.7 (q,  $^2J_{\text{C-F}}$  = 31.0 Hz), 131.6, 129.0, 128.6 (q,  $^3J_{\text{C-F}}$  = 4.0 Hz), 124.3 (q,  $^1J_{\text{C-F}}$  = 272.1 Hz), 71.4, 61.8, 34.8, 31.7, 27.9, 26.9;  $^{19}\text{F-NMR}$  (377 MHz,  $\text{CDCl}_3$ )  $\delta$  -59.37; IR (neat)  $\nu$  = 3343, 2925, 1676, 1296, 1129  $\text{cm}^{-1}$ ; HRMS (EI)  $m/z$  Calcd for  $\text{C}_{17}\text{H}_{17}^{11}\text{BF}_6\text{O}_3$   $[\text{M}]^+$  394.1175, found 394.1173.

**(*E*)-2-(2,6-Bis(trifluoromethyl)phenyl)-4-(hexa-3,5-dien-1-yl)-1,3,2-dioxaborinane (15)**

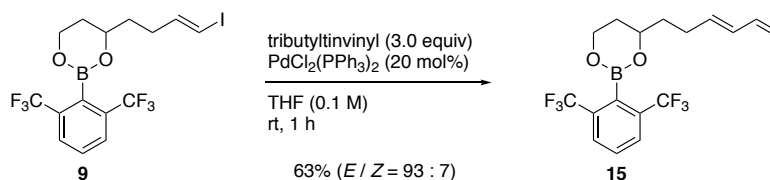

To a stirred solution of **9** (47.8 mg, 0.100 mmol) in THF (1.0 mL, 0.10 M) at room temperature was added tributylvinyltin (87.3  $\mu\text{L}$ , 0.300 mmol, 3.0 equiv). After stirring for 10 min, bis(triphenylphosphine)palladium dichloride (14.0 mg, 0.0200 mmol, 20 mol%) was added to the mixture. After stirring for 1 h, the reaction mixture was concentrated under reduced pressure to give the crude product, which was purified by silica gel column chromatography (silica /  $\text{K}_2\text{CO}_3$  = 9:1, *n*-hexane : EtOAc = 19 : 1) to give **15** (23.8 mg, 0.0629 mmol, 63% yield, *E/Z* = 93 : 7) as a colorless oil.

Data for **15**: colorless oil;  $R_f$  0.29 (19/1 *n*-hexane/EtOAc);  $^1\text{H-NMR}$  (400 MHz,  $\text{CDCl}_3$ )  $\delta$  7.79 (d,  $J$  = 7.9 Hz, 2H), 7.57 (t,  $J$  = 7.9 Hz, 1H), 6.31 (dt,  $J$  = 17.0, 10.2 Hz, 1H), 6.08 (dd,  $J$  = 15.2, 10.2 Hz, 1H), 5.70 (dt,  $J$  = 15.2, 7.0 Hz, 1H), 5.10 (d,  $J$  = 17.0 Hz, 1H), 4.97 (d,  $J$  = 10.2 Hz, 1H), 4.21-4.08 (m, 3H), 2.35-2.16 (m, 2H), 2.03 (dq,  $J$  = 14.2, 3.6 Hz, 1H), 1.97-1.88 (m, 1H), 1.82-1.73 (m, 1H), 1.68-1.06 (m, 1H);  $^{13}\text{C-NMR}$  (100 MHz,  $\text{CDCl}_3$ )  $\delta$  137.1, 134.1, 134.7 (q,  $^2J_{\text{C-F}}$  = 31.1 Hz), 131.6, 128.9, 128.6 (q,  $^3J_{\text{C-F}}$  = 4.3 Hz), 124.3 (q,  $^1J_{\text{C-F}}$  = 272.1 Hz), 115.1, 71.5, 61.9, 35.9, 31.6, 27.9;  $^{19}\text{F-NMR}$  (377 MHz,  $\text{CDCl}_3$ )  $\delta$  -59.39; IR (neat)  $\nu$  = 3327, 2921, 1644, 1296, 1069  $\text{cm}^{-1}$ ; HRMS (EI)  $m/z$  calcd for  $\text{C}_{17}\text{H}_{17}^{11}\text{BF}_6\text{O}_3$   $[\text{M}]^+$  378.1226, found 378.1233.

**6. Experimental procedures for the deprotection of 2,6-bis(trifluoromethyl)phenylboronic ester **3e** and the formation of *o*-FXylB(OH)<sub>2</sub> from potassium trifluoroborate **17****

**Deprotection of boronic ester **3e** by transesterification**

**6-(Benzyloxy)hexane-1,3-diol (**2e**)**

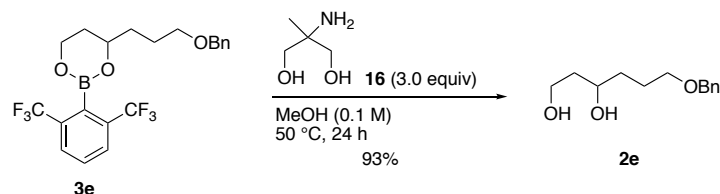

To a stirred solution of **3e** (44.6 mg, 0.100 mmol, 1.0 equiv) in MeOH (1.0 mL, 0.10 M) at room temperature was added 2-amino-2-methyl-1,3-propanediol (**16**) (31.5 mg, 0.300 mmol, 3.0 equiv). After stirring for 24 h at 50 °C, the reaction mixture was concentrated under reduced pressure. The resulting mixture was diluted EtOAc (5.0 mL), and washed successively with 1 M aqueous HCl (3.0 mL) and brine (3.0 mL), and dried over Na<sub>2</sub>SO<sub>4</sub>. Filtered and concentration under reduced pressure furnished the crude product, which was purified by silica gel column chromatography (EtOAc) to give **2e** (20.8 mg, 0.0927 mmol, 93% yield) as a colorless oil.

**Table S2.** Optimization of deprotection conditions by transesterification using diol **16**

| entry    | <b>16</b> (equiv) | solvent             | temp.        | time        | ratio<br><b>3e/2e</b> | isolated yield<br><b>2e</b> |
|----------|-------------------|---------------------|--------------|-------------|-----------------------|-----------------------------|
| 1        | 10                | MeOH (0.1 M)        | rt           | 24 h        | 0:100                 | 90%                         |
| 2        | 3                 | MeOH (0.1 M)        | rt           | 24 h        | 25:75                 | ND                          |
| <b>3</b> | <b>3</b>          | <b>MeOH (0.1 M)</b> | <b>50 °C</b> | <b>24 h</b> | <b>0:100</b>          | <b>93%</b>                  |
| 4        | 1.2               | MeOH (0.1 M)        | 50 °C        | 36 h        | 12:88                 | ND                          |

### Deprotection and recovering method of *o*-FXylB(OH)<sub>2</sub> (**1a**)

**6-(Benzyloxy)hexane-1,3-diol (2e) and (2,6-bis(trifluoromethyl)phenyl)trifluoro- $\lambda^4$ -borane, potassium salt (17)**

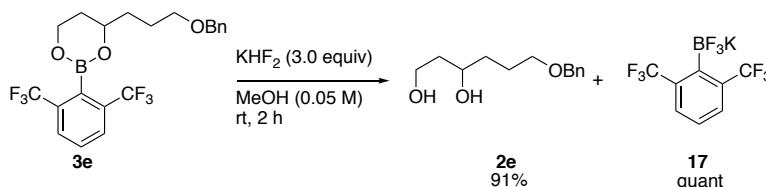

To a stirred solution of **3e** (22.3 mg, 0.0500 mmol, 1.0 equiv) in MeOH (1.0 mL, 0.050 M) at room temperature was added a aqueous solution of potassium bifluoride (4.5 M in H<sub>2</sub>O, 33.3  $\mu$ L, 0.150 mmol, 3.0 equiv). After stirring for 2 h, the reaction mixture was concentrated under reduced pressure to remove MeOH. The resulting mixture was filtrated and rinsed with CH<sub>2</sub>Cl<sub>2</sub> (20 mL). Trifluoroborate **17** (18.3 mg, 0.0500 mmol, quant) was obtained as a white solid after drying. Concentration of the filtrate under reduced pressure furnished the crude product, which was purified by silica gel column chromatography (EtOAc) to give **2e** (10.2 mg, 0.0460 mmol, 91% yield) as a colorless oil.

Data for **17**: white solid; *R*<sub>f</sub> 0.60 (4/1 CHCl<sub>3</sub>/MeOH); <sup>1</sup>H-NMR (400 MHz, CDCl<sub>3</sub>)  $\delta$  7.79 (d, *J* = 8.0 Hz, 2H), 7.43 (t, *J* = 8.0 Hz, 1H); <sup>13</sup>C-NMR (100 MHz, CDCl<sub>3</sub>)  $\delta$  136.6 (q, <sup>2</sup>*J*<sub>C-F</sub> = 30.7 Hz), 129.8 (q, <sup>3</sup>*J*<sub>C-F</sub> = 5.6 Hz), 127.4, 126.6 (q, <sup>1</sup>*J*<sub>C-F</sub> = 272.5 Hz); <sup>19</sup>F-NMR (377 MHz, CDCl<sub>3</sub>)  $\delta$  -56.3 (q, *J* = 23.8 Hz, 6F), -134.3 (m, 3F); IR (neat)  $\nu$  = 3367, 1293, 1120 cm<sup>-1</sup>; HRMS (FAB) *m/z* Calcd for C<sub>8</sub>H<sub>3</sub><sup>11</sup>BF<sub>9</sub> [M-K]<sup>+</sup> 281.0184, found 281.0188.

### 2,6-Bis(trifluoromethyl)phenylboronic acid (**1a**)

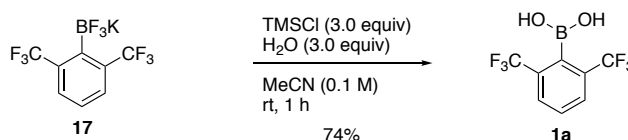

To a stirred solution of **17** (16.0 mg, 0.0500 mmol) in MeCN (0.50 mL, 0.10 M) at room temperature was added trimethylsilylchloride (18.5  $\mu$ L, 0.150 mmol, 3.0 equiv) and H<sub>2</sub>O (2.70  $\mu$ L, 0.150 mmol, 3.0 equiv) were added. After stirring for 1 h, the reaction was quenched by adding saturated aqueous NaHCO<sub>3</sub> (0.5 mL). The resulting mixture was extracted with EtOAc (2 x 2 mL). The combined organic layer was washed with brine (3.0 mL), and dried over Na<sub>2</sub>SO<sub>4</sub>. Filtered and concentration under reduced pressure furnished the crude product, which was purified by silicagel column chromatography (*n*-hexane : EtOAc = 2 : 1) to give **1a** (9.50 mg, 0.0368 mmol, 74% yield) as a white solid.

## 7. Experimental procedures for the synthesis of enetriyne natural product 18

### (*E*)-2-(2,6-Bis(trifluoromethyl)phenyl)-4-(undeca-3-en-5,7,9-triyn-1-yl)-1,3,2-dioxaborinane (20)

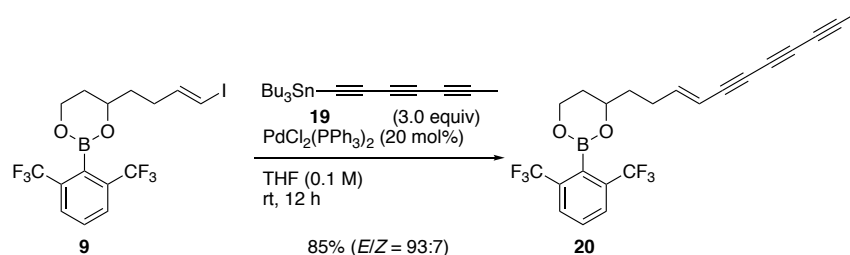

To a stirred solution of **9** (62.1 mg, 0.130 mmol) in THF (1.3 mL, 0.10 M) at room temperature was added **19**<sup>2</sup> (147 mg, 0.390 mmol, 3.0 equiv). After stirring for 10 min, bis(triphenylphosphine)palladium dichloride (18.2 mg, 0.0260 mmol, 20 mol%) was added to the mixture. After stirring for 12 h, the reaction mixture was concentrated under reduced pressure to give the crude product, which was purified by silica gel column chromatography (silica / K<sub>2</sub>CO<sub>3</sub> = 9:1, *n*-hexane : EtOAc = 19 : 1) to give **20** (48.5 mg, 0.110 mmol, 85% yield, *E/Z* = 93 : 7) as a colorless oil.

Data for **20**: colorless oil; *R*<sub>f</sub> 0.32 (9/1 *n*-hexane/EtOAc); <sup>1</sup>H-NMR (400 MHz, CDCl<sub>3</sub>) δ 7.79 (d, *J* = 7.9 Hz, 2H), 7.57 (t, *J* = 7.9 Hz, 1H), 6.37 (dt, *J* = 15.8, 3.2 Hz, 1H), 5.53 (d, *J* = 15.8 Hz, 1H), 4.21-4.08 (m, 3H), 2.39-2.22 (m, 2H), 2.04-1.87 (m, 2H), 1.98 (s, 3H), 1.78-1.59 (m, 2H); <sup>13</sup>C-NMR (100 MHz, CDCl<sub>3</sub>) δ 149.1, 133.7 (q, <sup>2</sup>*J*<sub>C-F</sub> = 31.0 Hz), 129.0, 128.6 (q, <sup>3</sup>*J*<sub>C-F</sub> = 4.3 Hz), 124.3 (q, <sup>1</sup>*J*<sub>C-F</sub> = 272.1 Hz), 108.9, 77.7, 74.3, 73.5, 71.2, 66.5, 64.9, 61.9, 59.2, 35.2, 31.7, 28.7, 4.6; IR (neat) ν = 2927, 2223, 1295, 1130 cm<sup>-1</sup>; HRMS (FAB) *m/z* Calcd for C<sub>22</sub>H<sub>17</sub><sup>11</sup>BF<sub>6</sub>O<sub>2</sub>Na [M+Na]<sup>+</sup> 461.1123, found 461.1139.

### (*E*)-tetradeca-6-en-8,10,12-triyn-1,3-diol (18)

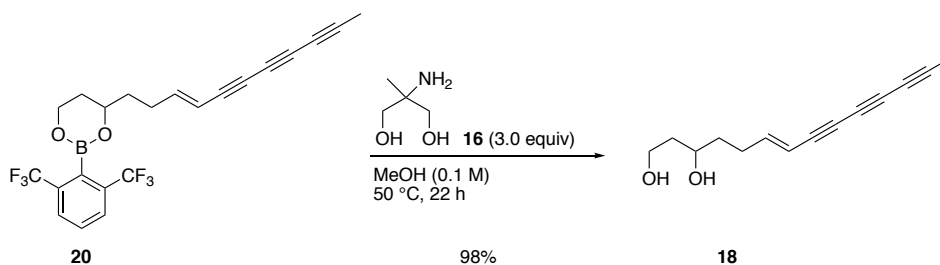

To a stirred solution of **20** (20.3 mg, 0.0460 mmol, 1.0 equiv) in MeOH (0.46 mL, 0.10 M) at room temperature was added 2-amino-2-methyl-1,3-propanediol (**16**) (14.6 mg, 0.140 mmol, 3.0 equiv). After stirring for 22 h at 50 °C, the reaction mixture was concentrated under reduced pressure. The resulting mixture was diluted with EtOAc (3.0 mL), washed successively with 1 M aqueous HCl (2.0 mL) and brine (2.0 mL), and dried over Na<sub>2</sub>SO<sub>4</sub>. Filtered and concentration under reduced pressure furnished the crude product, which was purified by silica gel column chromatography (*n*-hexane : EtOAc = 1 : 4) to give **18** (9.8 mg, 0.045 mmol, 98% yield) as a white

solid.

Data for **18**: white solid;  $R_f$  0.29 (1/4 *n*-hexane/EtOAc);  $^1\text{H-NMR}$  (400 MHz,  $\text{CDCl}_3$ )  $\delta$  6.39 (dt,  $J = 15.9, 7.2$  Hz, 1H), 5.54 (d,  $J = 15.9$  Hz, 1H), 3.93-3.80 (m, 3H), 2.34-2.21 (m, 2H), 1.98 (s, 3H), 1.71-1.53 (m, 4H);  $^{13}\text{C-NMR}$  (100 MHz,  $\text{CDCl}_3$ )  $\delta$  149.5, 108.7, 77.8, 74.3, 73.5, 71.2, 66.6, 64.9, 61.8, 59.2, 38.3, 36.3, 29.4, 4.6; IR (neat)  $\nu = 3326, 2932, 2222, 1054\text{ cm}^{-1}$ ; HRMS (FAB)  $m/z$  Calcd for  $\text{C}_{14}\text{H}_{16}\text{O}_2$  [M] 216.1150, found 216.1149.

## 8. Estimation of the half-lives of boronic esters **3e**, **3l-n**

### General procedure for the formation of boronic esters **3l-n** of diol **2e**

To a solution of **2e** (0.200 mmol, 1.0 equiv) in  $\text{ClCH}_2\text{CH}_2\text{Cl}$  (1.0 mL, 0.20 M) at room temperature was added boronic acid **1b-d** (0.200 mmol, 1.0 equiv), respectively. After stirring for 24 h under reflux, the reaction mixture was concentrated under reduced pressure to give the boronic ester **3l-n**, respectively.

#### 4-(3-(Benzyloxy)propyl)-2-phenyl-1,3,2-dioxaborinane (**3l**)

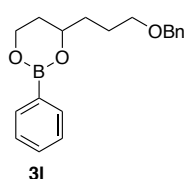

Data for **3l**: colorless oil;  $^1\text{H-NMR}$  (400 MHz,  $\text{CDCl}_3$ )  $\delta$  7.79-7.77 (m, 2H), 7.43-7.72 (m, 8H), 4.54 (s, 2H), 4.22-4.07 (m, 3H), 3.63-3.53 (m, 2H), 2.00 (dq,  $J = 14.0, 3.4$  Hz, 1H), 2.03-1.92 (m, 1H), 1.87-1.69 (m, 4H).

#### 4-(3-(Benzyloxy)propyl)-2-(2-(trifluoromethyl)phenyl)-1,3,2-dioxaborinane (**3m**)

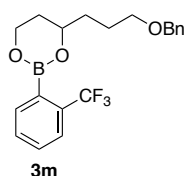

Data for **3m**: colorless oil;  $^1\text{H-NMR}$  (400 MHz,  $\text{CDCl}_3$ )  $\delta$  7.67-7.62 (m, 2H), 7.50-7.43 (m, 2H), 7.35-7.27 (m, 5H), 4.52 (s, 2H), 4.22-4.09 (m, 3H), 3.59-3.49 (m, 3H), 2.03 (dq,  $J = 14.2, 3.4$  Hz, 1H), 1.92-1.68 (m, 5H).

#### 4-(3-(Benzyloxy)propyl)-2-(2,6-dimethylphenyl)-1,3,2-dioxaborinane (**3n**)

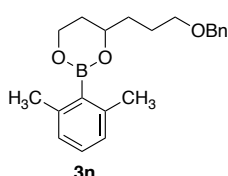

Data for **3n**: yellow oil;  $^1\text{H-NMR}$  (400 MHz,  $\text{CDCl}_3$ )  $\delta$  7.37-7.28 (m, 5H), 7.09 (t,  $J = 7.5$  Hz, 1H), 6.93 (d,  $J = 7.5$  Hz, 2H), 4.51 (s, 2H), 4.10-4.21 (m, 3H), 3.57-3.48 (m, 2H), 2.36 (s, 6 H), 2.06 (dq,  $J = 14.1, 3.4$  Hz, 1H), 1.92-1.69 (m, 5H).

### Estimation of half-lives of boronic esters **3l-n** by $^1\text{H NMR}$ in $\text{CD}_3\text{OD}/\text{D}_2\text{O}$ (9:1)

A 5-mm NMR tube was charged with the boronic ester (0.050 mmol),  $\text{CD}_3\text{OD}$  (540  $\mu\text{L}$ ) and  $\text{D}_2\text{O}$  (60.0  $\mu\text{L}$ ). The tube was capped with a septum, shaken, and left at room temperature. Conversion of boronic ester to diol **2e** was monitored by  $^1\text{H NMR}$  spectroscopy.

**Scheme S1.** Stabilities of arylboronic esters **3a,l-n** in aqueous media

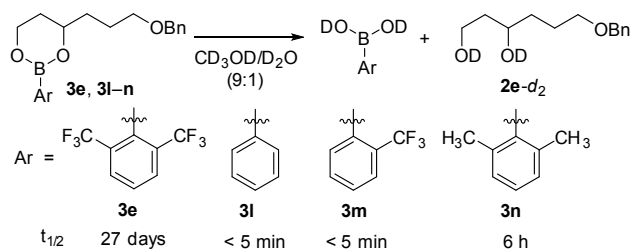

## 9. DFT calculations of boronic esters **3o-r**

The geometric optimizations of four boronic esters **3o-r** were performed by the long-range correction<sup>5a</sup> for Becke 1988 exchange<sup>6</sup> and one-parameter progressive correlation<sup>5b</sup> functional (LC-BOP) with the cc-pVTZ basis set on the development version of Gaussian 09 program (Figure S1).

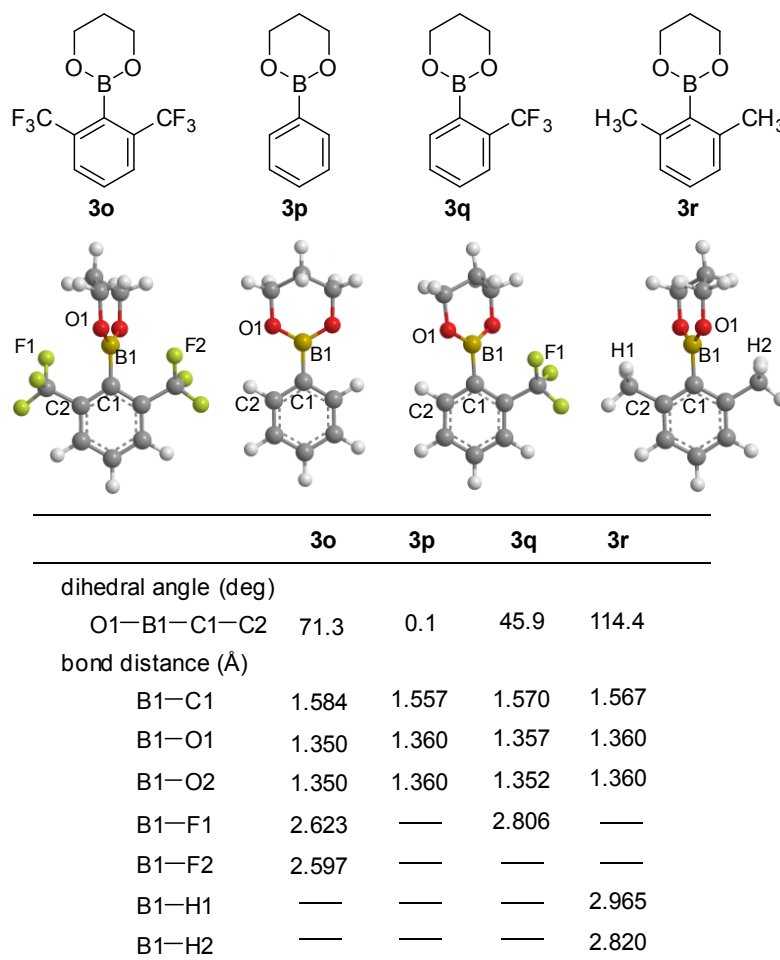

**Figure S1.** Optimized structures of boronic esters **3o-r**

Incorporating a bulky trifluoromethyl group to both the ortho positions is considered to sterically shield the boron atom of the 1,3,2-dioxaborinane ring from the attacks of water and oxygen molecules and other nucleophiles coming from the perpendicular to the 1,3,2-dioxaborinane ring. In the optimized structure of 2,6-bis(trifluoromethyl)phenyl boronic ester **3o**, both B-F distances (B1-F1:2.623 Å, B1-F2:2.597 Å) are shorter than the sum of the van der Waals radii (3.3 Å). We therefore performed the atoms-in-molecules (AIM) analysis<sup>7</sup> for the optimized structure of 2,6-bis(trifluoromethyl)phenylboronic ester **3o** to investigate the possibility of the penta-coordination of boron atom *via* three-center four-electron (3c–4e) F-B-F bond.<sup>8</sup> As a result, we found no bond path between the boron atom and the two fluorine atoms.

We also compared the electronic structures of these esters **3o–3r** to analyze a significant difference in the stability of the boronic esters (Table S2 and Figure S2). Calculated results showed that the trifluoromethylations at the both *ortho* positions of benzene ring remarkably increased LUMO energy by 2.544 eV and decreased HOMO energy by 1.008 eV, from those of phenylboronic ester **3p**. Consequently, the 2,6-bis(trifluoromethyl)phenylboronic ester **3o** replaces LUMO with the LUMO+1, compared to those of other boronic ester **3p**, **3q** and **3r**. In terms of LUMO distribution, the each LUMO of **3p**, **3q** and **3r** mainly delocalized on benzene ring and 1,3,2-dioxaborinane ring containing boron atom. In contrast, the LUMO of **3o** is well distributed on benzene ring, but not localized on boron atom. These differences may cause the high stability of boronic ester **3o** against nucleophiles such as water and alcohols.

**Table S3.** Molecular orbital energy levels (eV) of **3o–3r**

|           | <b>3o</b> | <b>3p</b> | <b>3q</b> | <b>3r</b> |
|-----------|-----------|-----------|-----------|-----------|
| LUM 0 + 5 | 5.439     | 4.110     | 4.126     | 4.043     |
| LUM 0 + 4 | 5.087     | 3.862     | 3.754     | 3.771     |
| LUM 0 + 3 | 4.809     | 3.825     | 3.616     | 3.481     |
| LUM 0 + 2 | 4.727     | 3.038     | 3.000     | 2.882     |
| LUM 0 + 1 | 4.370     | 2.590     | 1.993     | 2.822     |
| LUM 0     | 4.218     | 1.826     | 1.521     | 2.228     |
| HOM 0     | −10.530   | −9.522    | −10.010   | −9.035    |
| HOM 0 −1  | −10.700   | −9.561    | −10.169   | −9.195    |
| HOM 0 −2  | −11.518   | −11.339   | −11.410   | −11.344   |
| HOM 0 −3  | −11.776   | −11.571   | −11.743   | −11.429   |
| HOM 0 −4  | −12.282   | −11.792   | −12.159   | −11.611   |
| HOM 0 −5  | −12.483   | −12.307   | −12.381   | −12.029   |



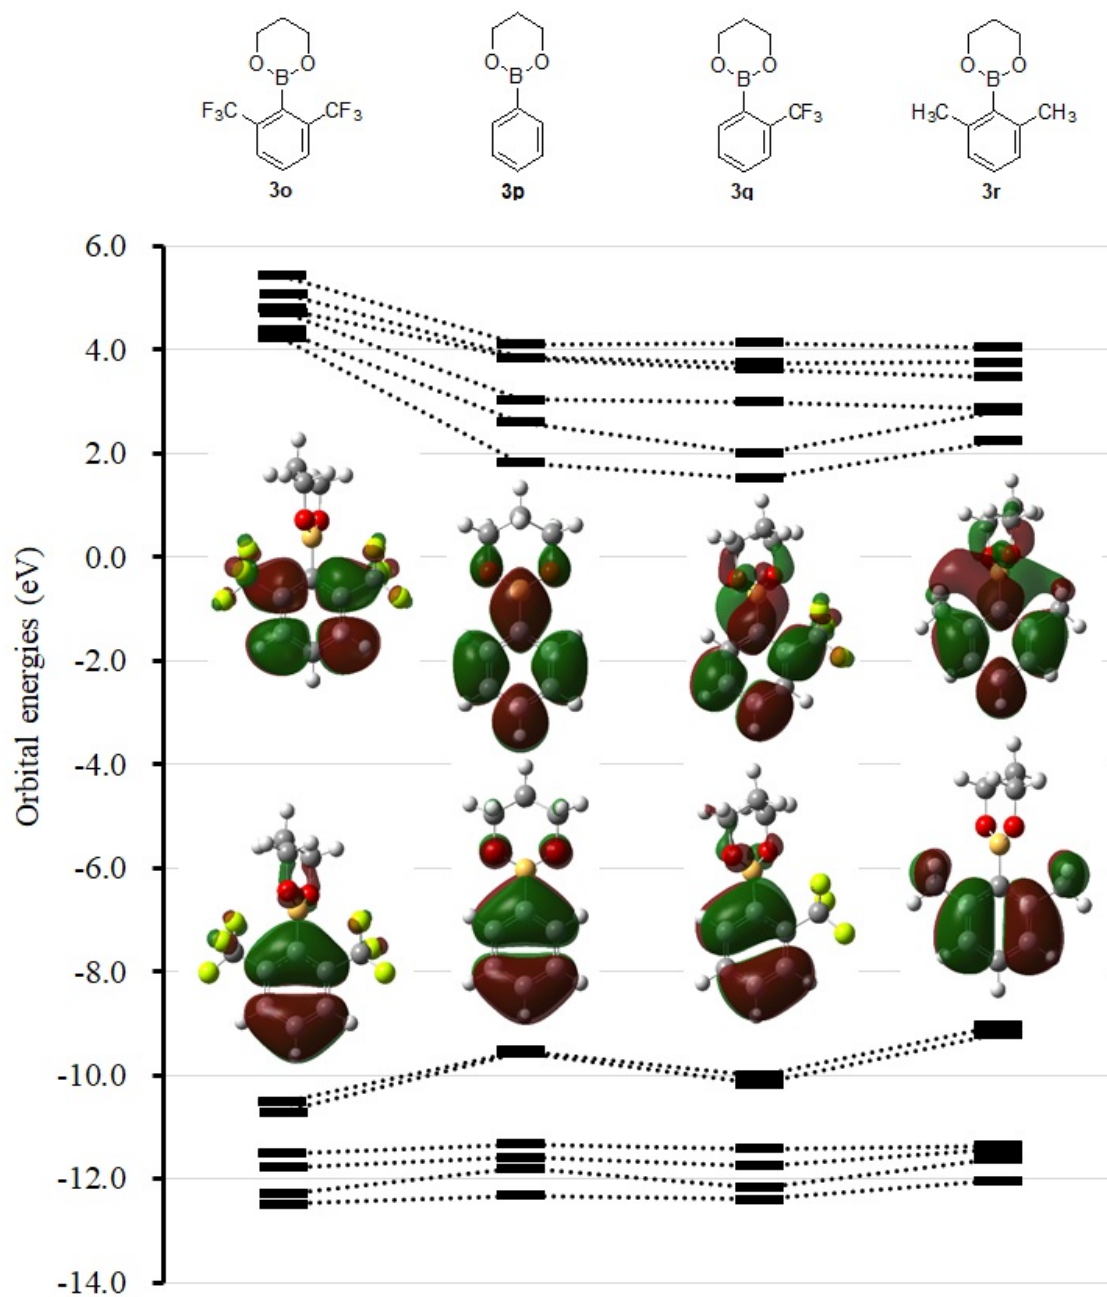

**Figure S2.** Comparison of molecular orbital surfaces and their energy levels (eV) of **3o–3r**

### Cartesian coordinates of the optimized structures of boronic esters 3o–r

#### Boronic ester 3o

|   |            |            |            |
|---|------------|------------|------------|
| C | 0.2563970  | -0.5319190 | 0.0019310  |
| C | -0.5411680 | -1.6647470 | -0.0532260 |
| C | -0.0033980 | -2.9328920 | -0.0678880 |
| C | 1.3587090  | -3.1031030 | -0.0277490 |
| C | 2.1750630  | -2.0005130 | 0.0270150  |
| C | 1.6269390  | -0.7366430 | 0.0415800  |
| B | -0.3600000 | 0.9266680  | 0.0232200  |
| C | -2.0372440 | -1.5418980 | -0.0670970 |
| C | 2.5703660  | 0.4307740  | 0.0708930  |
| O | -0.9931190 | 1.3349470  | 1.1431650  |
| O | -0.2232070 | 1.6941960  | -1.0791190 |
| F | -2.5427840 | -1.4445760 | 1.1633970  |
| F | -2.6192940 | -2.5983860 | -0.6397160 |
| F | -2.4478260 | -0.4631260 | -0.7451790 |
| F | 2.0713160  | 1.4650580  | 0.7594800  |
| F | 2.8519750  | 0.8773240  | -1.1537840 |
| F | 3.7350380  | 0.1159500  | 0.6431620  |
| C | -1.5737130 | 2.6248790  | 1.2054260  |
| C | -0.7346830 | 3.0141440  | -1.0824630 |
| C | -1.9324430 | 3.1231280  | -0.1724570 |
| H | -0.6570510 | -3.7910470 | -0.1166590 |
| H | 1.7841100  | -4.0960650 | -0.0390030 |
| H | 3.2477080  | -2.1192810 | 0.0649450  |
| H | -0.8617780 | 3.2973180  | 1.6874740  |
| H | -2.4521490 | 2.5534780  | 1.8430100  |
| H | -0.9925530 | 3.2584180  | -2.1104280 |
| H | 0.0592560  | 3.6925840  | -0.7641450 |
| H | -2.7491950 | 2.5243100  | -0.5759050 |
| H | -2.2725160 | 4.1563300  | -0.1197790 |

Boronic ester **3p**

|   |            |            |            |
|---|------------|------------|------------|
| C | 0.9019610  | 0.0000200  | -0.0296440 |
| C | 1.6124560  | 1.1891860  | -0.0059050 |
| C | 2.9884280  | 1.1930140  | 0.0410500  |
| C | 3.6777930  | -0.0000070 | 0.0646540  |
| C | 2.9884060  | -1.1930150 | 0.0411140  |
| C | 1.6124310  | -1.1891630 | -0.0057950 |
| B | -0.6537980 | -0.0000040 | -0.0838750 |
| H | 1.0705660  | 2.1252650  | -0.0249640 |
| H | 1.0705170  | -2.1252290 | -0.0247000 |
| O | -1.3151320 | 1.1879880  | -0.1059930 |
| O | -1.3150850 | -1.1880410 | -0.1058560 |
| C | -2.7257820 | 1.2316260  | -0.1514050 |
| C | -2.7257290 | -1.2315530 | -0.1517270 |
| C | -3.3238780 | -0.0000600 | 0.4799890  |
| H | 3.5279080  | 2.1303360  | 0.0591270  |
| H | 4.7590150  | -0.0000120 | 0.1013590  |
| H | 3.5278650  | -2.1303470 | 0.0592610  |
| H | -3.0398540 | 1.3192900  | -1.1939180 |
| H | -3.0419570 | 2.1351410  | 0.3664170  |
| H | -3.0421200 | -2.1352460 | 0.3656450  |
| H | -3.0395210 | -1.3187640 | -1.1943660 |
| H | -3.1121800 | -0.0002140 | 1.5498960  |
| H | -4.4060150 | -0.0000680 | 0.3564090  |

Boronic ester **3q**

|   |            |            |            |
|---|------------|------------|------------|
| C | 0.4980280  | 0.8668970  | 0.0765080  |
| C | 1.4980880  | -0.0920760 | -0.0176630 |
| C | 2.8289850  | 0.2603780  | 0.0069940  |
| C | 3.1926690  | 1.5823110  | 0.1298600  |
| C | 2.2202530  | 2.5501660  | 0.2078060  |
| C | 0.8912360  | 2.1901890  | 0.1719570  |
| B | -1.0445970 | 0.5755410  | 0.1090340  |
| C | 1.1555910  | -1.5458430 | -0.1668180 |
| H | 0.1317550  | 2.9589360  | 0.2160180  |
| O | -1.5359500 | -0.3639600 | 0.9475010  |
| O | -1.8466820 | 1.3493550  | -0.6650180 |
| F | 0.8485900  | -2.1219460 | 0.9959840  |
| F | 2.1717500  | -2.2479350 | -0.6811460 |
| F | 0.1142750  | -1.7329190 | -0.9883600 |
| C | -2.9168200 | -0.6649240 | 0.9800370  |
| C | -3.2482700 | 1.1570700  | -0.6455740 |
| C | -3.5852790 | -0.2745140 | -0.3140080 |
| H | 3.5872120  | -0.5029750 | -0.0815100 |
| H | 4.2389650  | 1.8531030  | 0.1517180  |
| H | 2.4956670  | 3.5926320  | 0.2906730  |
| H | -3.3655120 | -0.1341540 | 1.8219980  |
| H | -3.0118180 | -1.7320490 | 1.1700660  |
| H | -3.6273680 | 1.4377750  | -1.6258830 |
| H | -3.6850080 | 1.8368940  | 0.0892480  |
| H | -3.2342610 | -0.9236140 | -1.1168920 |
| H | -4.6640130 | -0.4001330 | -0.2333510 |

Boronic ester **3r**

|   |            |            |            |
|---|------------|------------|------------|
| H | 3.8364470  | -0.3083310 | -0.0020180 |
| C | -0.5825010 | 2.7218090  | -0.1976470 |
| H | 1.9287890  | 3.4621390  | -0.3584380 |
| C | 3.0124820  | 1.6385910  | -0.1940010 |
| C | 2.9289790  | 0.2777130  | -0.0494440 |
| C | 1.6982380  | -0.3458180 | 0.0325860  |
| C | 0.5288990  | 0.4085240  | -0.0398270 |
| C | 0.6155940  | 1.7958950  | -0.1715890 |
| C | 1.8609310  | 2.3872860  | -0.2497510 |
| H | 3.9780610  | 2.1216010  | -0.2621380 |
| C | 1.6525040  | -1.8513170 | 0.1874980  |
| B | -0.8223830 | -0.3918690 | 0.0154870  |
| O | -1.2179570 | -1.0821760 | -1.0892080 |
| O | -1.5399470 | -0.4395410 | 1.1707730  |
| C | -2.3722800 | -1.8958110 | -1.0689890 |
| C | -2.7156550 | -1.2179420 | 1.2739000  |
| C | -3.3794490 | -1.3865460 | -0.0691620 |
| H | -2.7833940 | -1.9037230 | -2.0765510 |
| H | -2.0741270 | -2.9182850 | -0.8249400 |
| H | -3.3748580 | -0.7199280 | 1.9824010  |
| H | -2.4505860 | -2.1899930 | 1.6953480  |
| H | -4.2156130 | -2.0799320 | 0.0100900  |
| H | -3.7782470 | -0.4294310 | -0.4056660 |
| C | 2.5031630  | -2.3431830 | 1.3476250  |
| C | 2.0359900  | -2.5466580 | -1.1090820 |
| H | 0.6259380  | -2.1388170 | 0.4155310  |
| H | 1.9678350  | -3.6293000 | -1.0039850 |
| H | 3.0600860  | -2.3033520 | -1.3904830 |
| H | 1.3822280  | -2.2383940 | -1.9221570 |
| H | 2.3689720  | -3.4151220 | 1.4883590  |
| H | 2.2330150  | -1.8418180 | 2.2751480  |
| H | 3.5632240  | -2.1696110 | 1.1714490  |
| C | -1.6929110 | 2.3003920  | -1.1444590 |
| C | -1.1196050 | 2.9676170  | 1.2054220  |
| H | -0.2082270 | 3.6766460  | -0.5687810 |
| H | -1.9382150 | 3.6870730  | 1.1825020  |
| H | -0.3415000 | 3.3620960  | 1.8564790  |
| H | -1.4869190 | 2.0442080  | 1.6481950  |
| H | -2.4043470 | 3.1162560  | -1.2666040 |
| H | -1.3054450 | 2.0359900  | -2.1261980 |
| H | -2.2542470 | 1.4498010  | -0.7659860 |

## 10. $^1\text{H}$ and $^{13}\text{C}$ NMR spectra

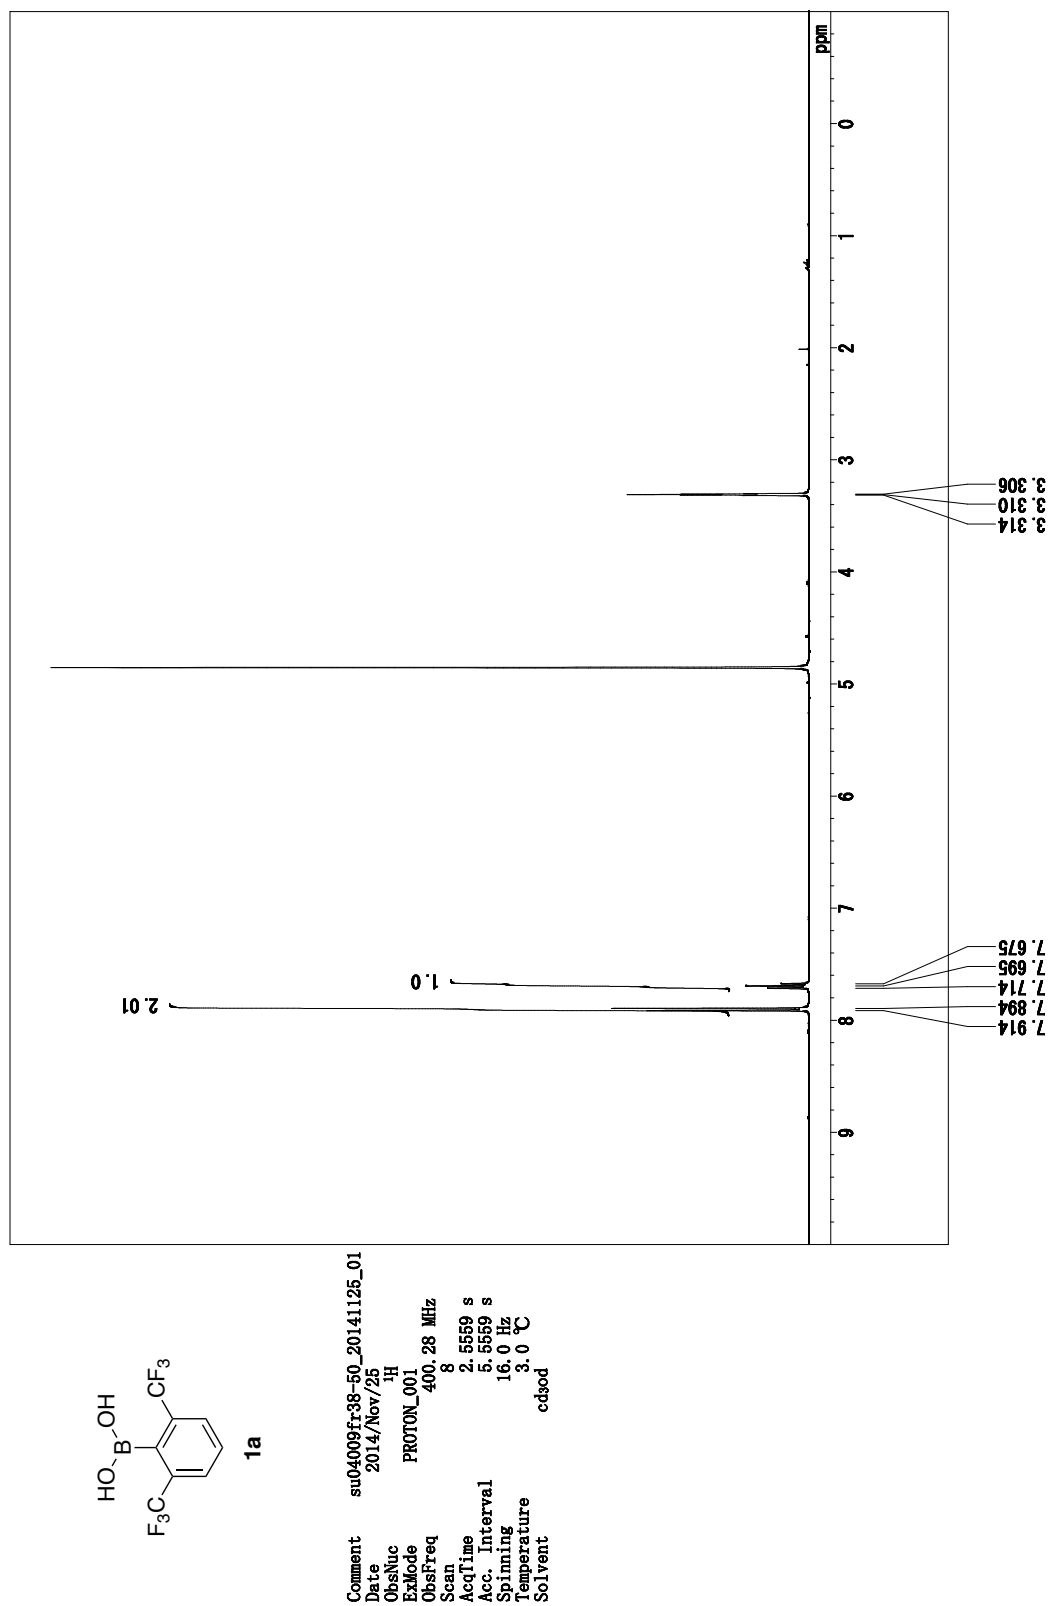

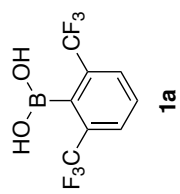

Comment su04009-13c\_20170201\_01  
 Date 2017/Feb/01  
 ObsNuc <sup>13</sup>C  
 ExMode CARBON\_001  
 ObsFreq 100.45 MHz  
 Scan 512  
 AcqTime 1.3631 s  
 Acc. Interval 3.3631 s  
 Spinning 20.0 Hz  
 Temperature 25.0 °C  
 Solvent cdcl<sub>3</sub>

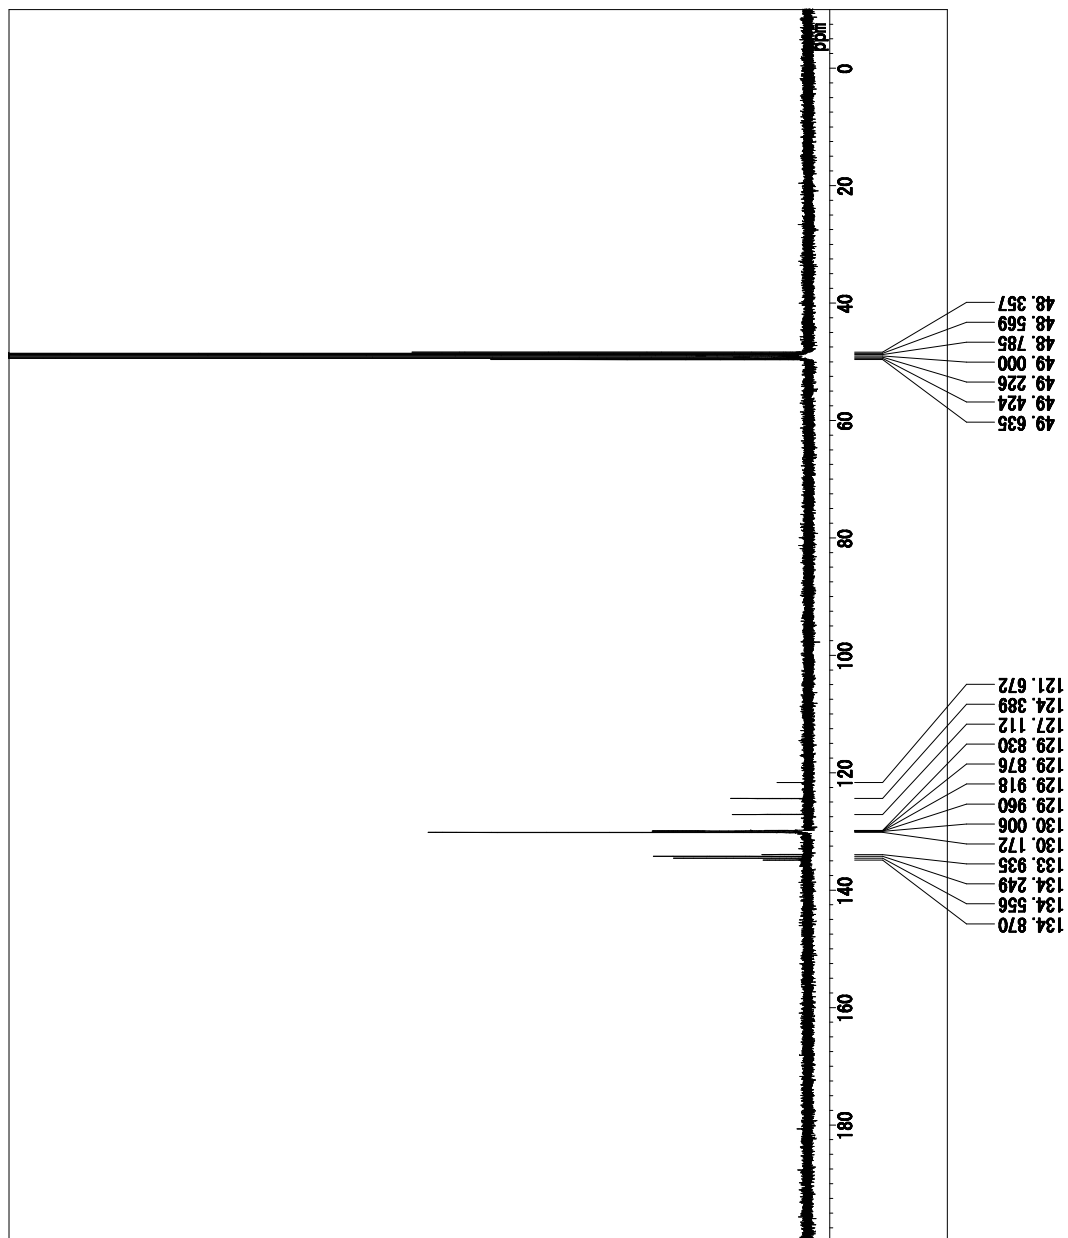

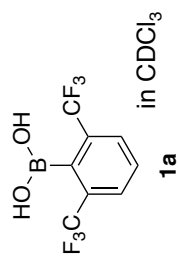

Comment  
 Date 2018/Aug/31  
 ObsNuc <sup>11</sup>B  
 ExMode s2pul  
 ObsFreq 128.31 MHz  
 Scan 80  
 AcqTime 0.3211 s  
 Acc. Interval 2.0 s  
 Spinning 20.0 Hz  
 Temperature 50.0 °C  
 Solvent cdcl<sub>3</sub>

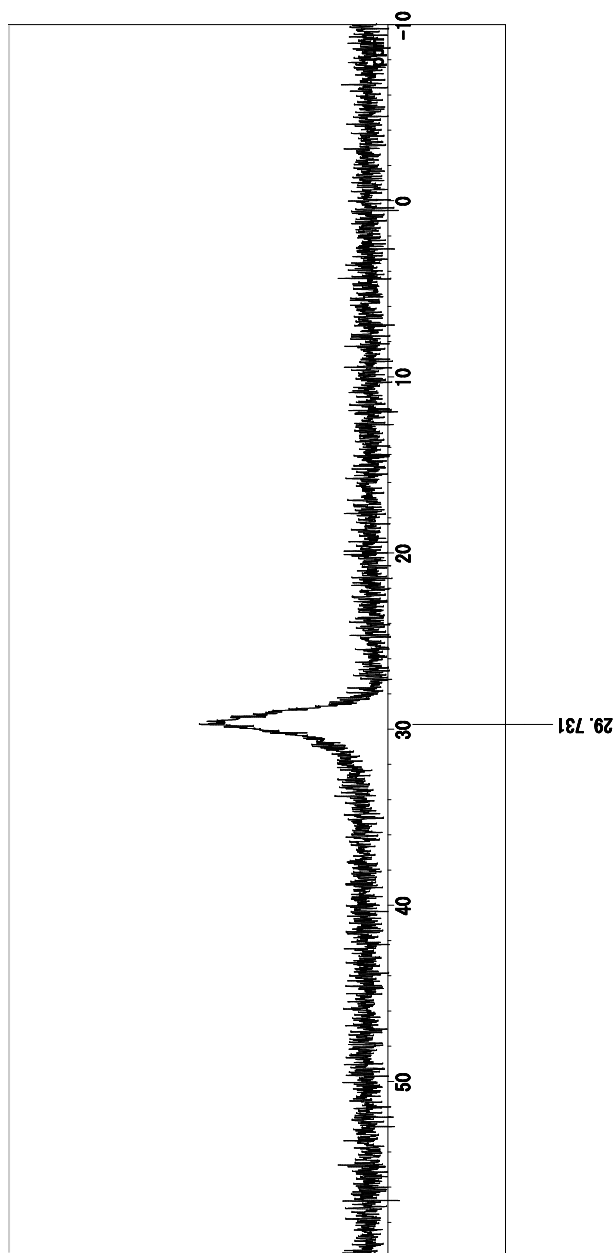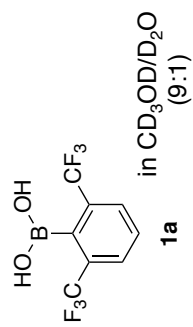

Comment  
 Date 2018/Sep/01  
 ObsNuc <sup>11</sup>B  
 ExMode s2pul  
 ObsFreq 128.31 MHz  
 Scan 80  
 AcqTime 0.3211 s  
 Acc. Interval 2.0 s  
 Spinning 20.0 Hz  
 Temperature 50.0 °C  
 Solvent cd<sub>3</sub>od

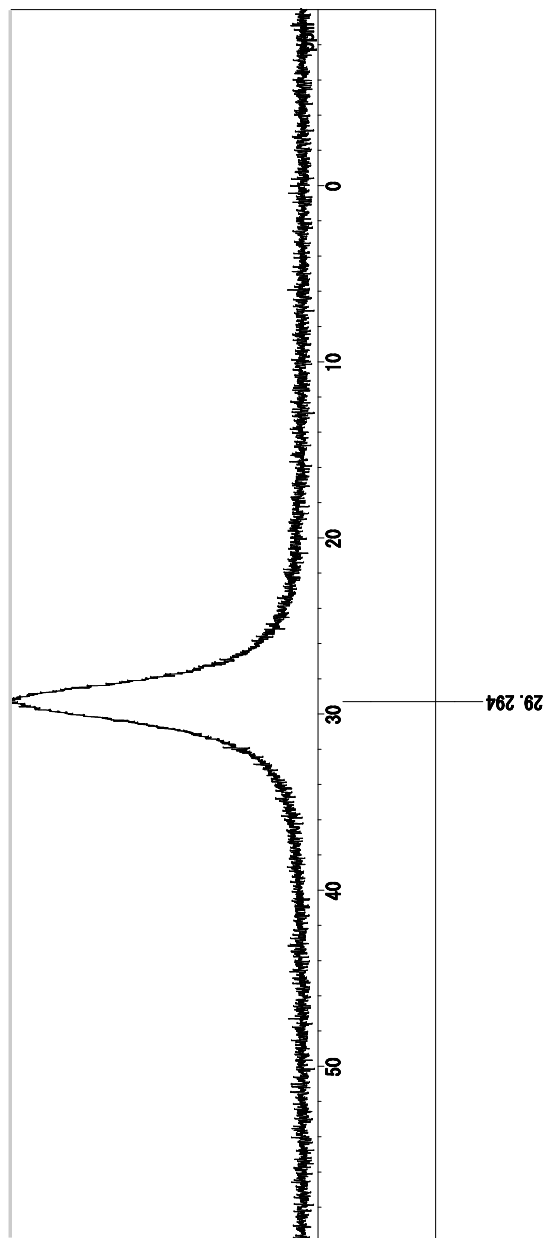



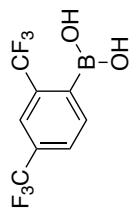

SI-1

Comment su04009fr64-81\_20141125\_01  
 Date 2014/Nov/25  
 ObsNuc <sup>1</sup>H  
 ExMode PROTON\_001  
 ObsFreq 400.28 MHz  
 Scan 4  
 AcqTime 2.5559 s  
 Acc. Interval 5.5559 s  
 Spinning 16.0 Hz  
 Temperature 3.0 °C  
 Solvent cd<sub>3</sub>od

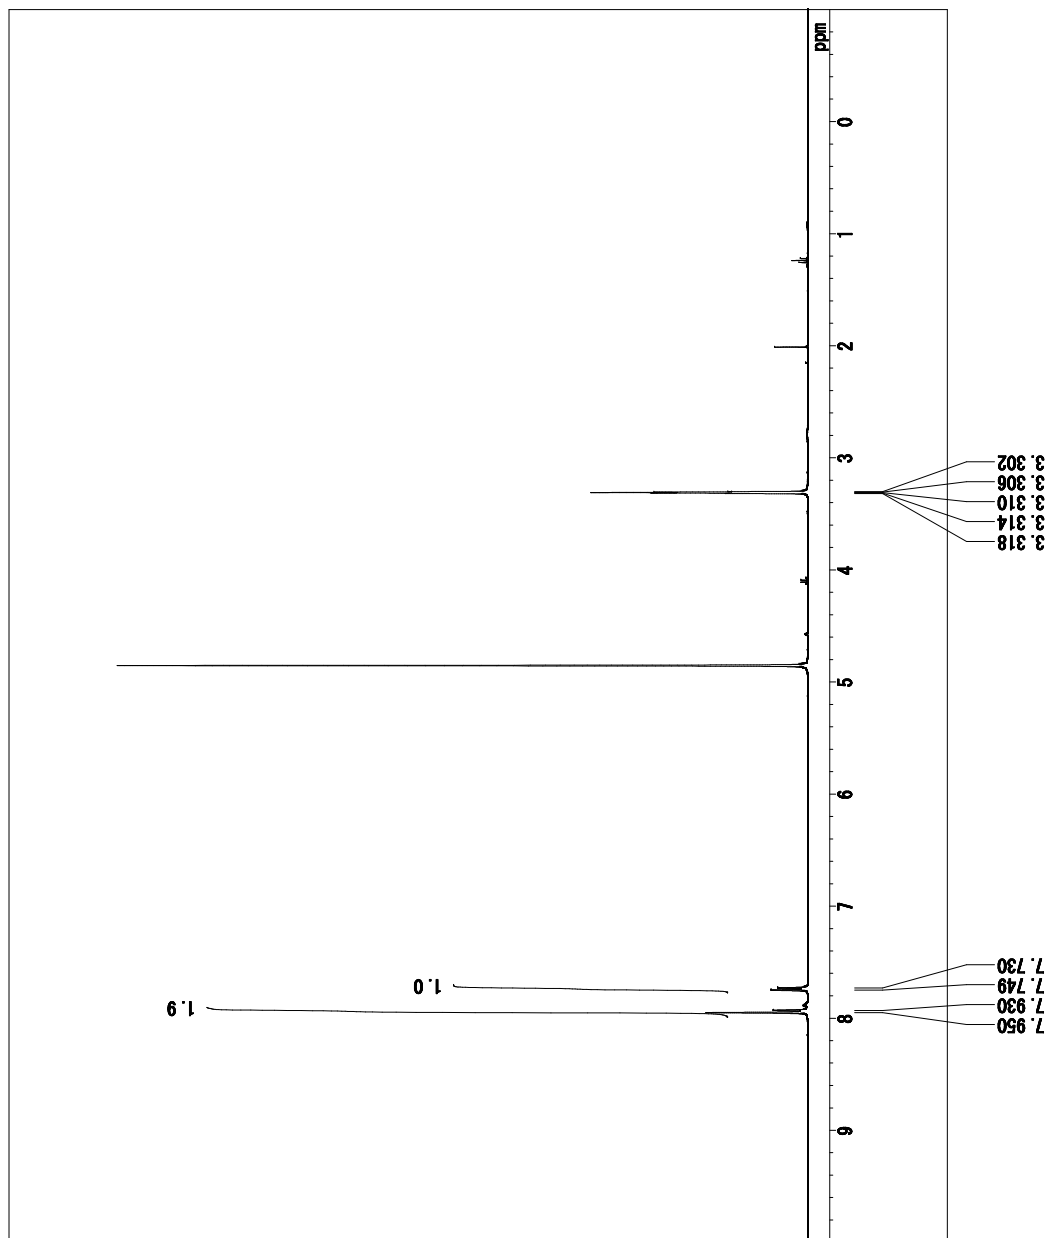



SI-1

Comment su-isomer-13C\_20180830\_01  
 Date 2018/Aug/30  
 ObsNuc <sup>13</sup>C  
 ExMode CARBON\_001  
 ObsFreq 100.66 MHz  
 Scan 512  
 AcqTime 1.3631 s  
 Acc. Interval 3.3631 s  
 Spinning 20.0 Hz  
 Temperature 25.0 °C  
 Solvent cd<sub>3</sub>od

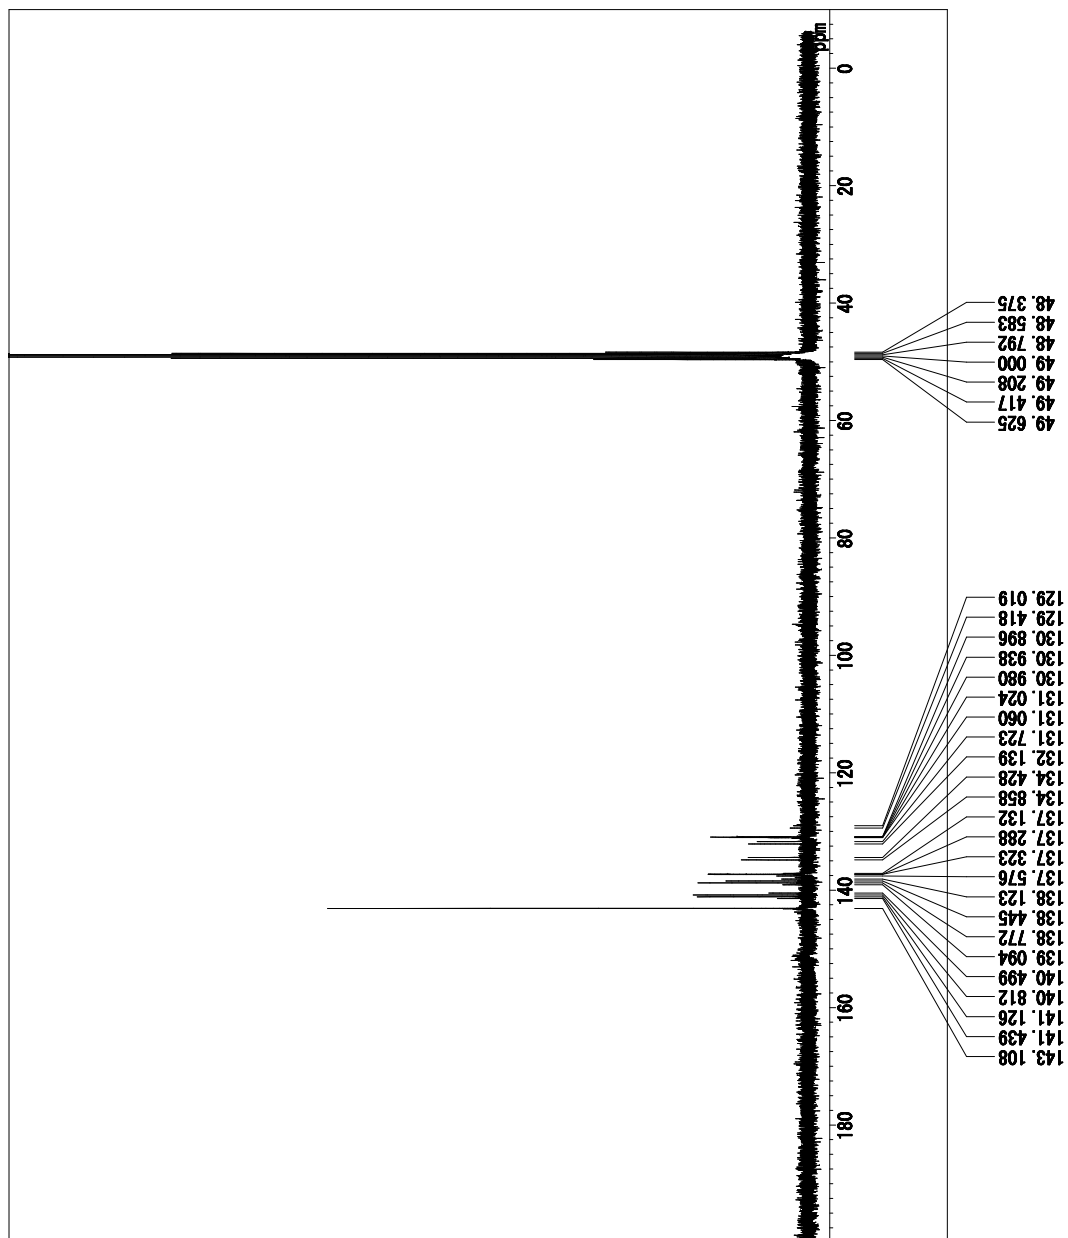

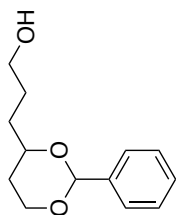

SI-2

Comment su20036\_20170831\_01  
 Date 2017/Aug/31  
 ObsNuc <sup>1</sup>H  
 ExMode PROTON\_001  
 ObsFreq 399.45 MHz  
 Scan 8  
 AcqTime 2.569 s  
 Acc. Interval 5.569 s  
 Spinning 16.0 Hz  
 Temperature 25.0 °C  
 Solvent cdc13

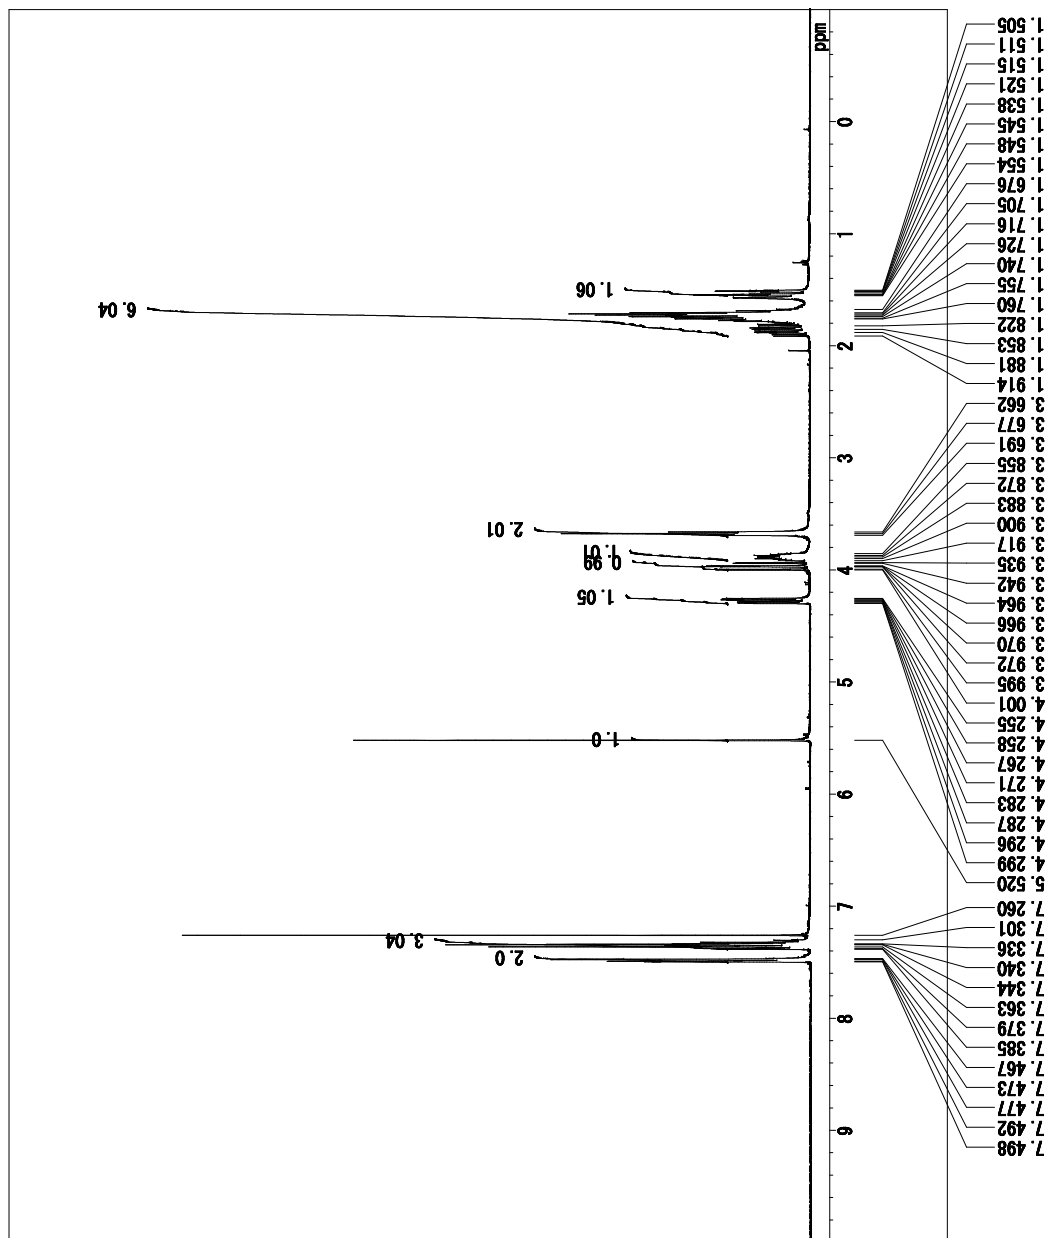

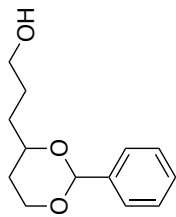

SI-2

Comment su20036-13C\_20170824\_01  
 Date 2017/Aug/24  
 ObsNuc <sup>13</sup>C  
 ExMode CARBON\_001  
 ObsFreq 100.66 MHz  
 Scan 112  
 AcqTime 1.3631 s  
 Acc. Interval 3.3631 s  
 Spinning 20.0 Hz  
 Temperature 25.0 °C  
 Solvent cdcl<sub>3</sub>

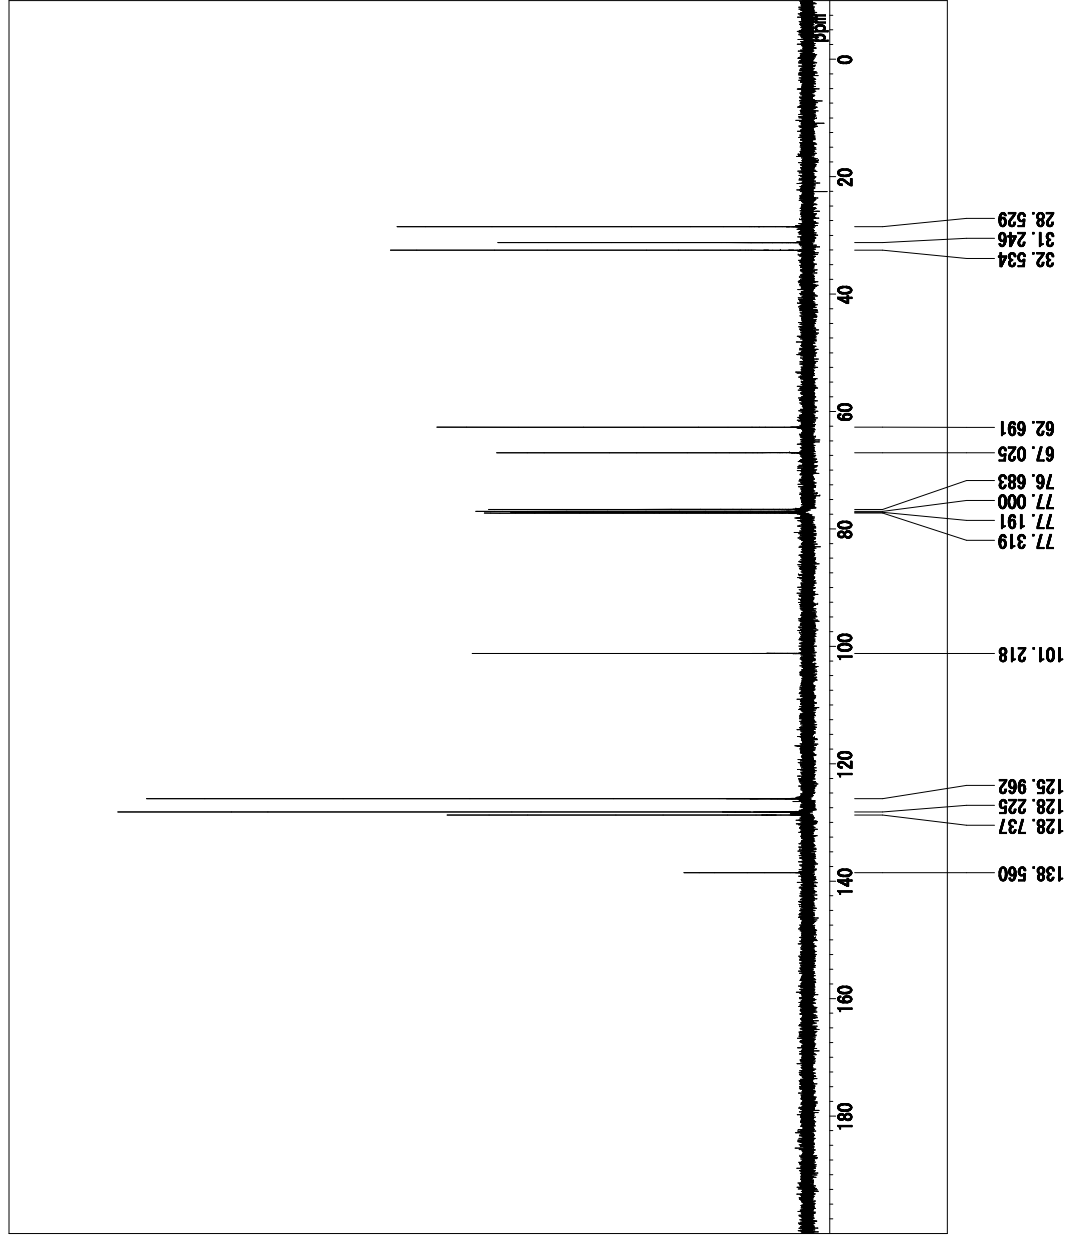

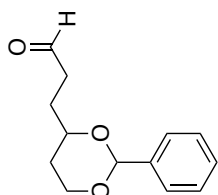

SI-3

Comment su21023-2\_20170901\_01  
 Date 2017/Sep/01  
 ObsNuc <sup>1</sup>H  
 ExMode PROTON\_001  
 ObsFreq 399.45 MHz  
 Scan 8  
 AcqTime 2.569 s  
 Acc. Interval 5.569 s  
 Spinning 16.0 Hz  
 Temperature 25.0 °C  
 Solvent cdcl<sub>3</sub>

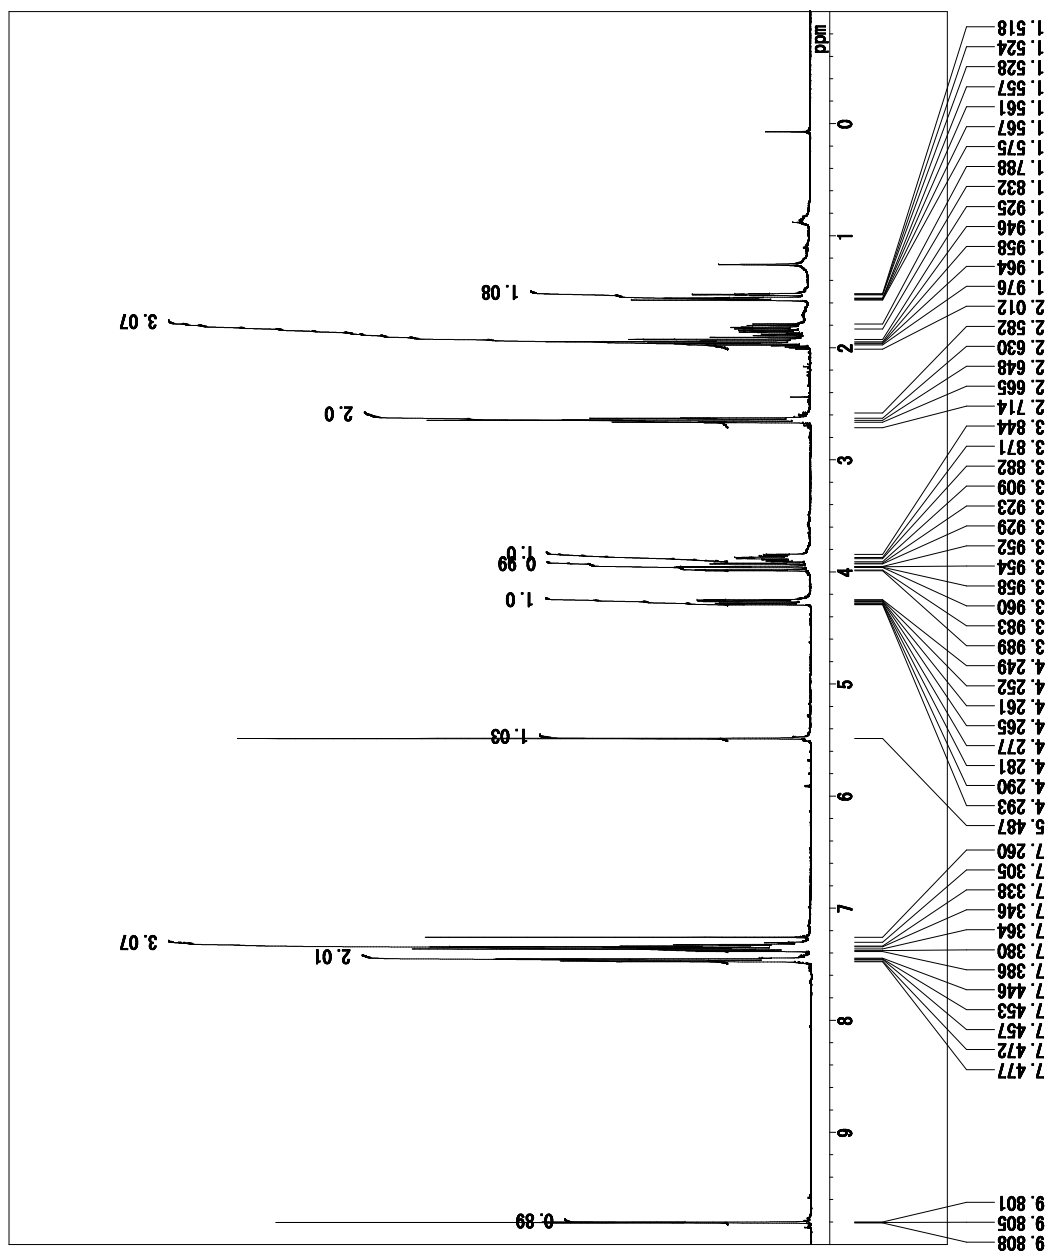

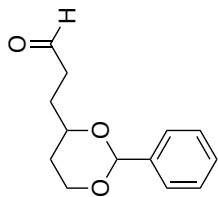

SI-3

Comment su21023\_20170831\_01  
 Date 2017/Aug/31  
 ObsNuc <sup>13</sup>C  
 ExMode CARBON\_001  
 ObsFreq 100.66 MHz  
 Scan 512  
 AcqTime 1.3631 s  
 Acc. Interval 3.3631 s  
 Spinning 20.0 Hz  
 Temperature 25.0 °C  
 Solvent cdcl<sub>3</sub>

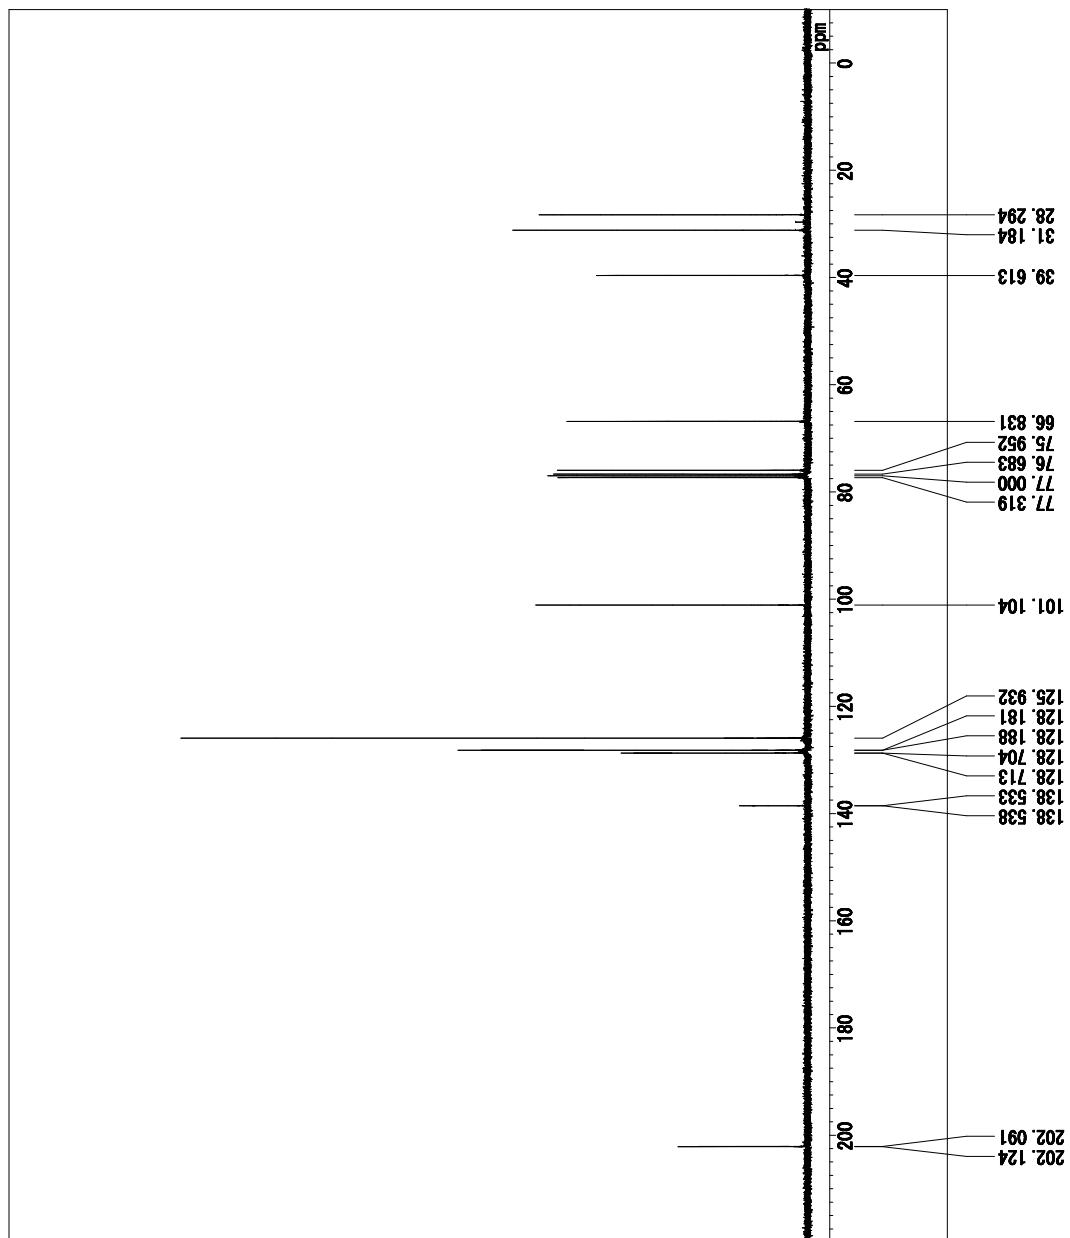

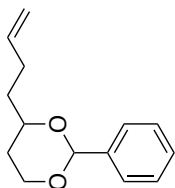

SI-4

Comment su21024\_20170829\_01  
 Date 2017/Aug/29  
 ObsNuc <sup>1</sup>H  
 ExMode PROTON\_001  
 ObsFreq 399.45 MHz  
 Scan 8  
 AcqTime 2.569 s  
 Acc. Interval 5.569 s  
 Spinning 16.0 Hz  
 Temperature 25.0 °C  
 Solvent cdcl<sub>3</sub>

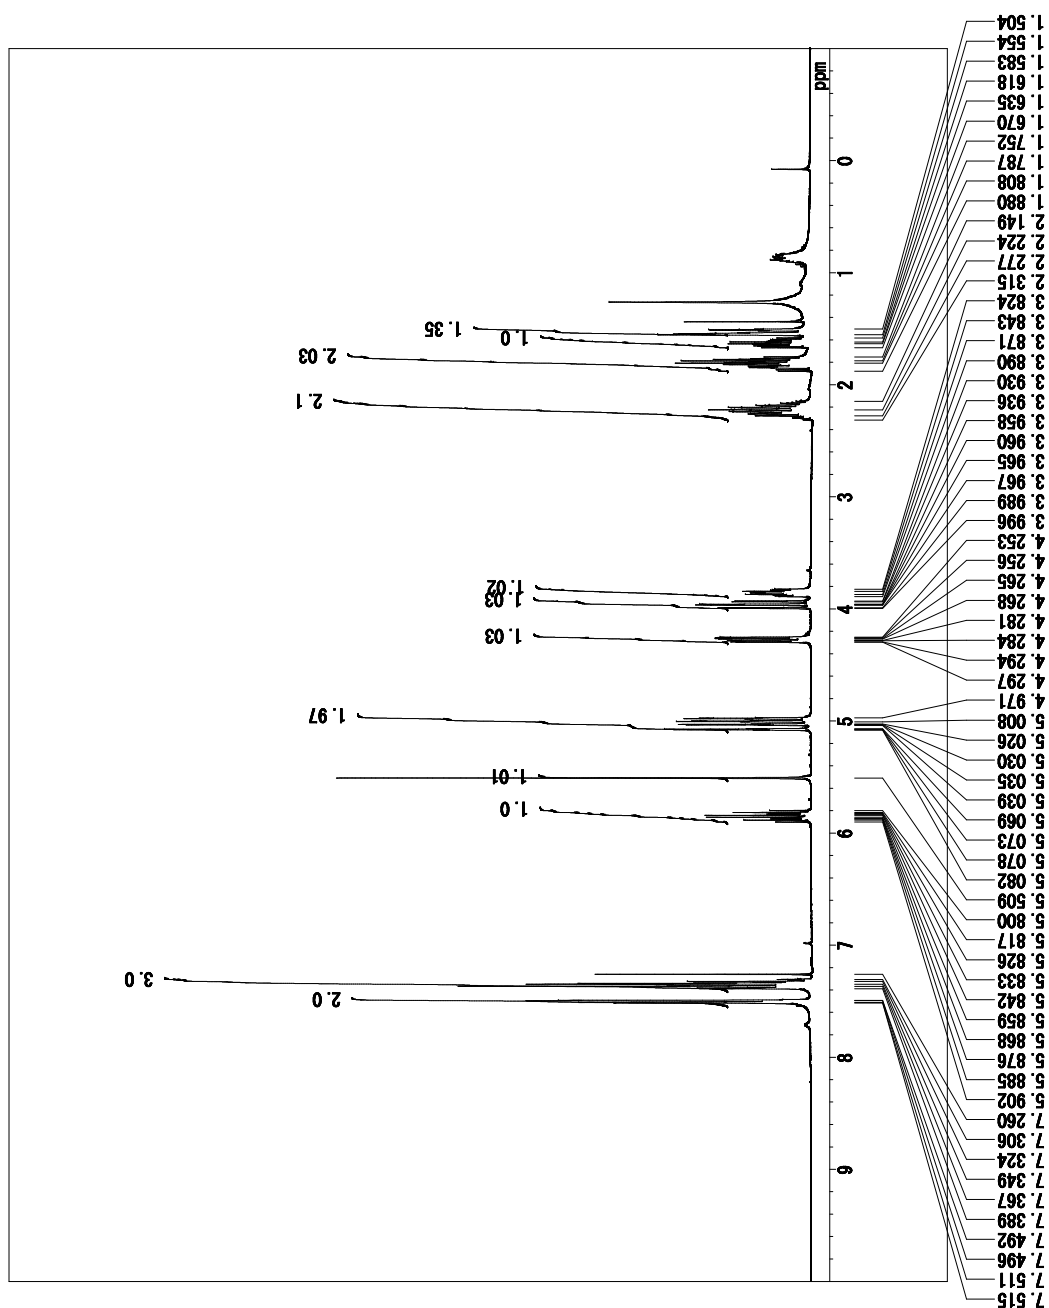

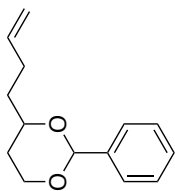

SI-4

Comment su21024\_20170829\_01  
 Date 2017/Aug/29  
 ObsNuc <sup>13</sup>C  
 ExMode CARBON\_001  
 ObsFreq 100.45 MHz  
 Scan 704  
 AcqTime 1.3631 s  
 Acc. Interval 3.3631 s  
 Spinning 20.0 Hz  
 Temperature 25.0 °C  
 Solvent cdc13

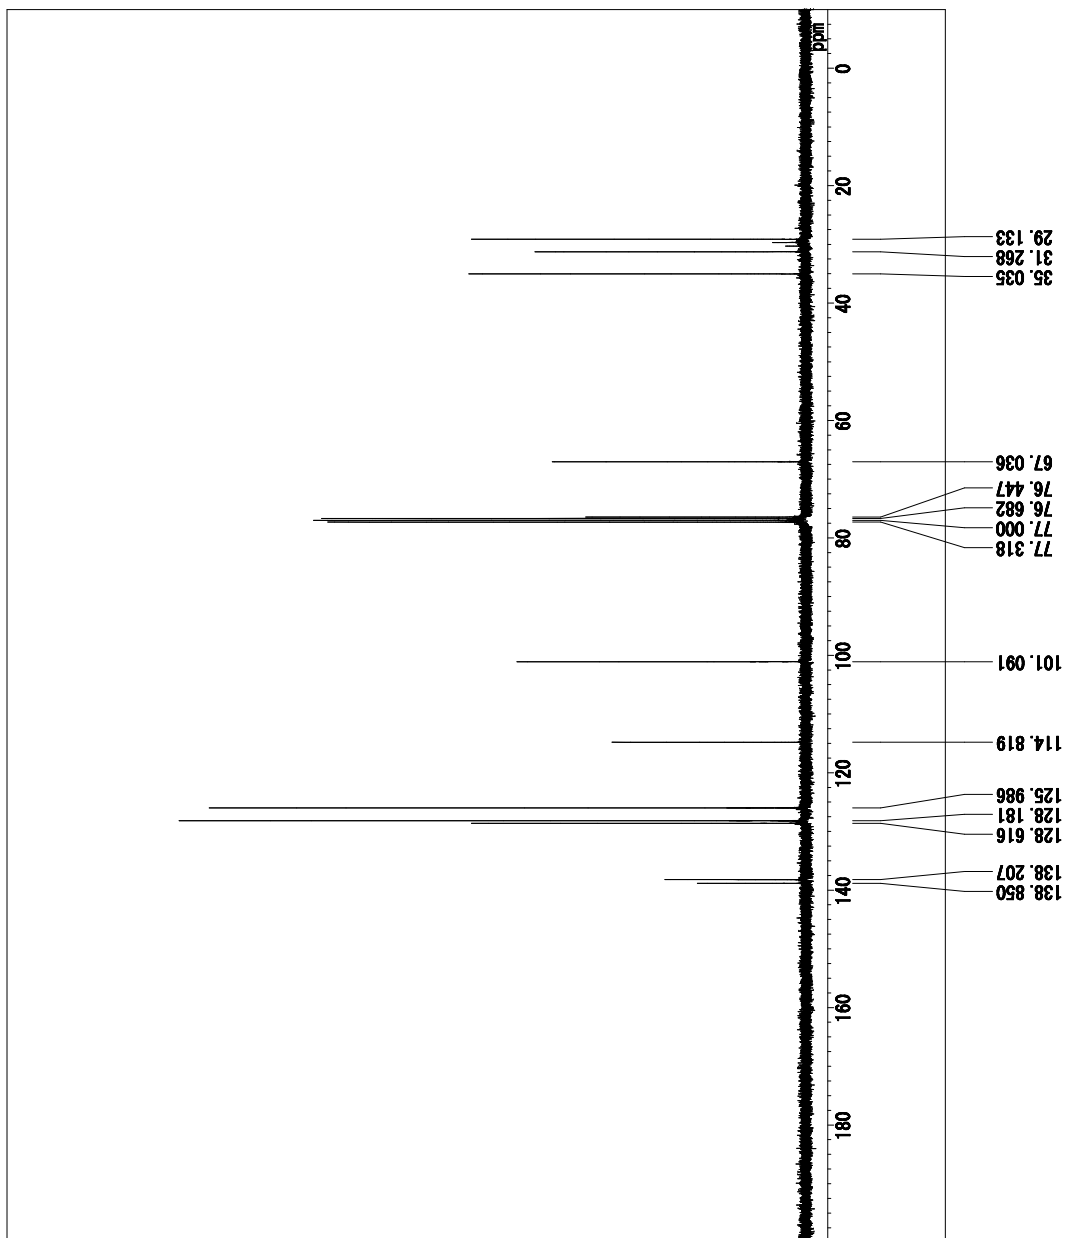



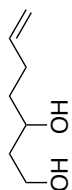

2c

Comment su21025\_20170830\_01  
 Date 2017/Aug/30  
 ObsNuc <sup>1</sup>H  
 ExMode PROTON\_001  
 ObsFreq 400.28 MHz  
 Scan 8  
 AcqTime 2.5559 s  
 Acc. Interval 5.5559 s  
 Spinning 16.0 Hz  
 Temperature 25.0 °C  
 Solvent cdcl<sub>3</sub>

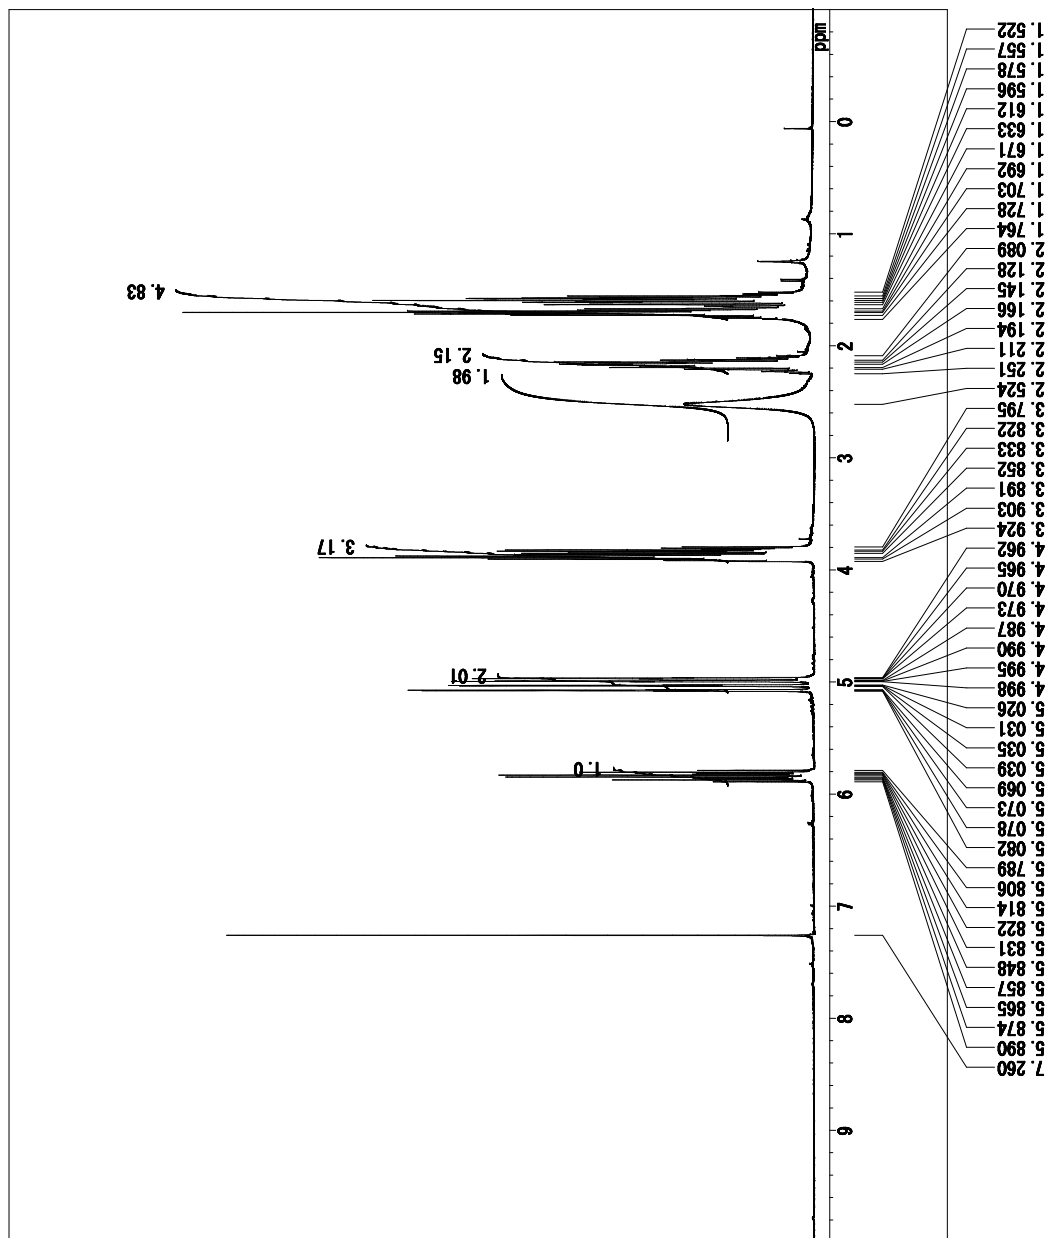



2c

Comment su21025\_20170830\_01  
 Date 2017/Aug/30  
 ObsNuc <sup>13</sup>C  
 ExMode CARBON\_001  
 ObsFreq 100.66 MHz  
 Scan 704  
 AcqTime 1.3631 s  
 Acc. Interval 3.3631 s  
 Spinning 20.0 Hz  
 Temperature 25.0 °C  
 Solvent cdcl<sub>3</sub>

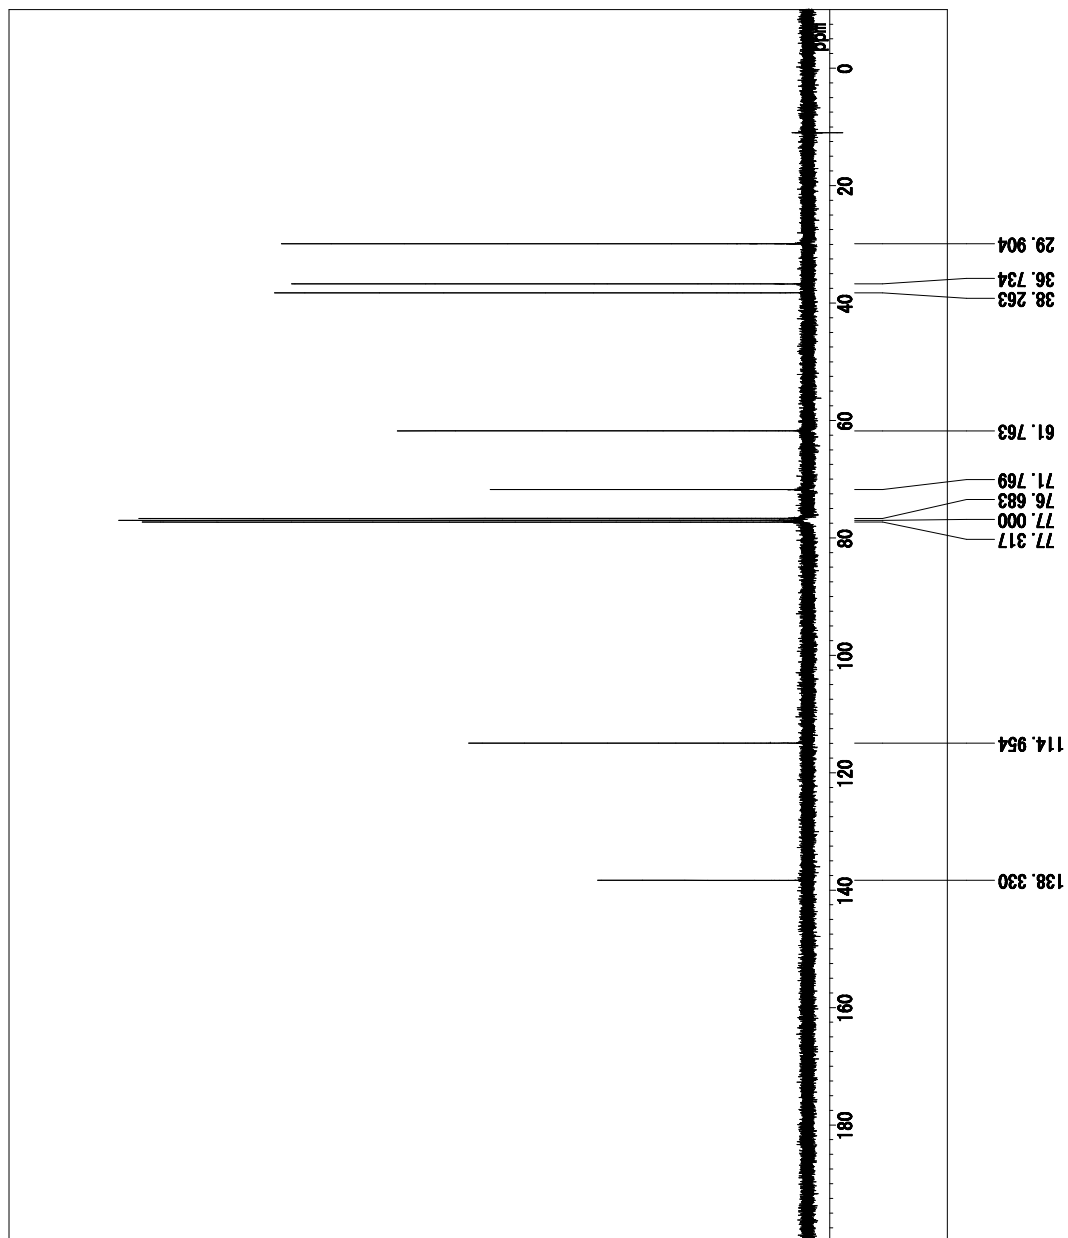

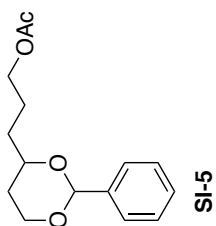

Comment su20037pure\_20170717\_01  
 Date 2017/Jul/17  
 ObsNuc <sup>1</sup>H  
 ExMode PROTON\_001  
 ObsFreq 400.28 MHz  
 Scan 32  
 AcqTime 2.5559 s  
 Acc. Interval 5.5559 s  
 Spinning 16.0 Hz  
 Temperature 25.0 °C  
 Solvent cdcl<sub>3</sub>

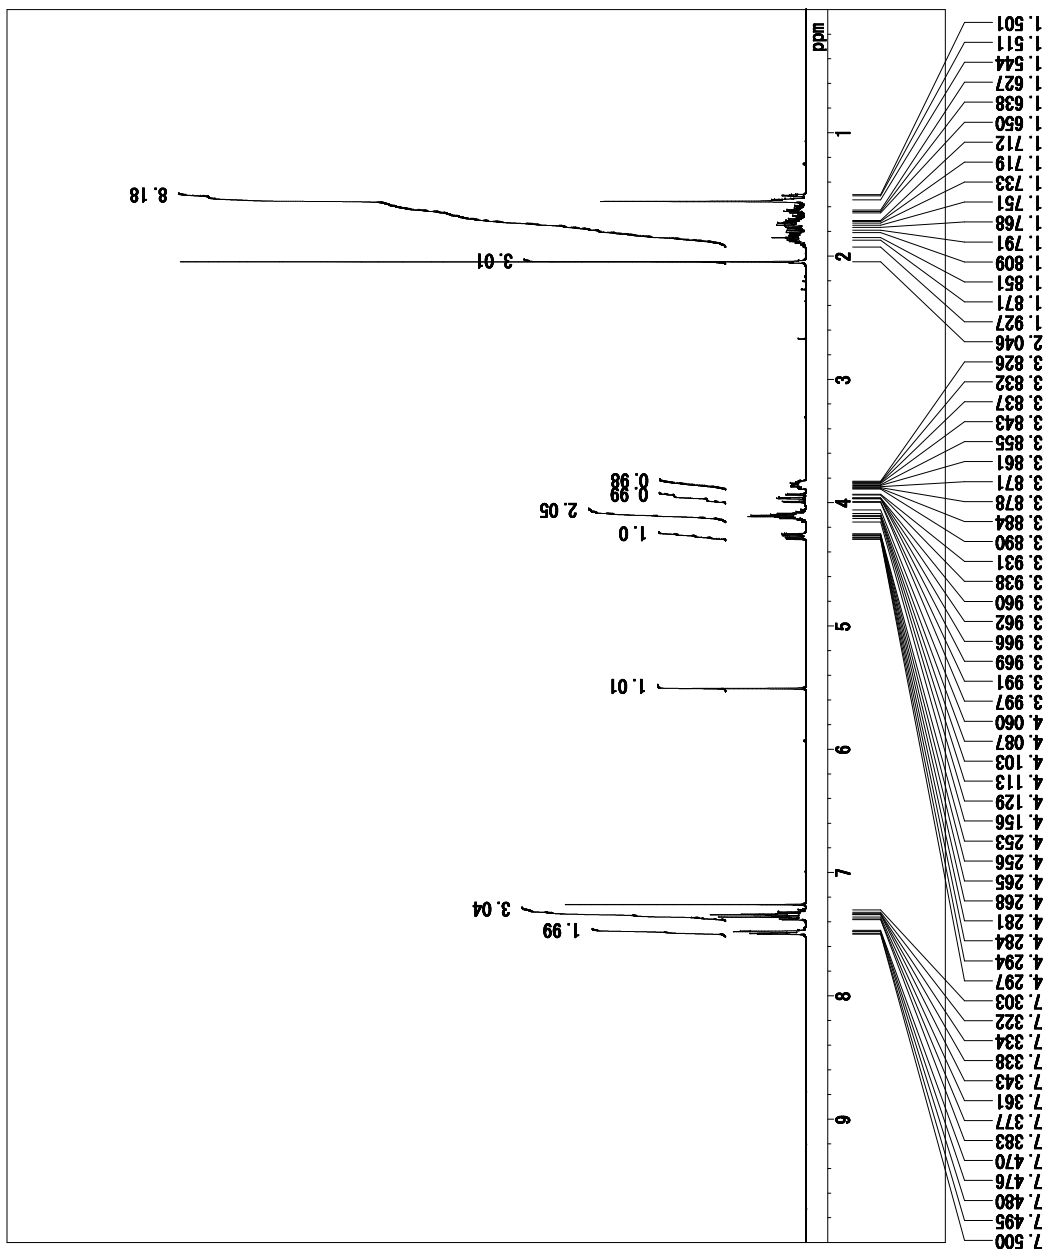

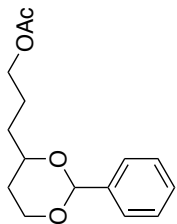

SI-5

Comment su21026-13C\_20170830\_01  
 Date 2017/Aug/30  
 ObsNuc <sup>13</sup>C  
 ExMode CARBON\_001  
 ObsFreq 100.66 MHz  
 Scan 480  
 AcqTime 1.3631 s  
 Acc. Interval 3.3631 s  
 Spinning 20.0 Hz  
 Temperature 25.0 °C  
 Solvent cdcl<sub>3</sub>

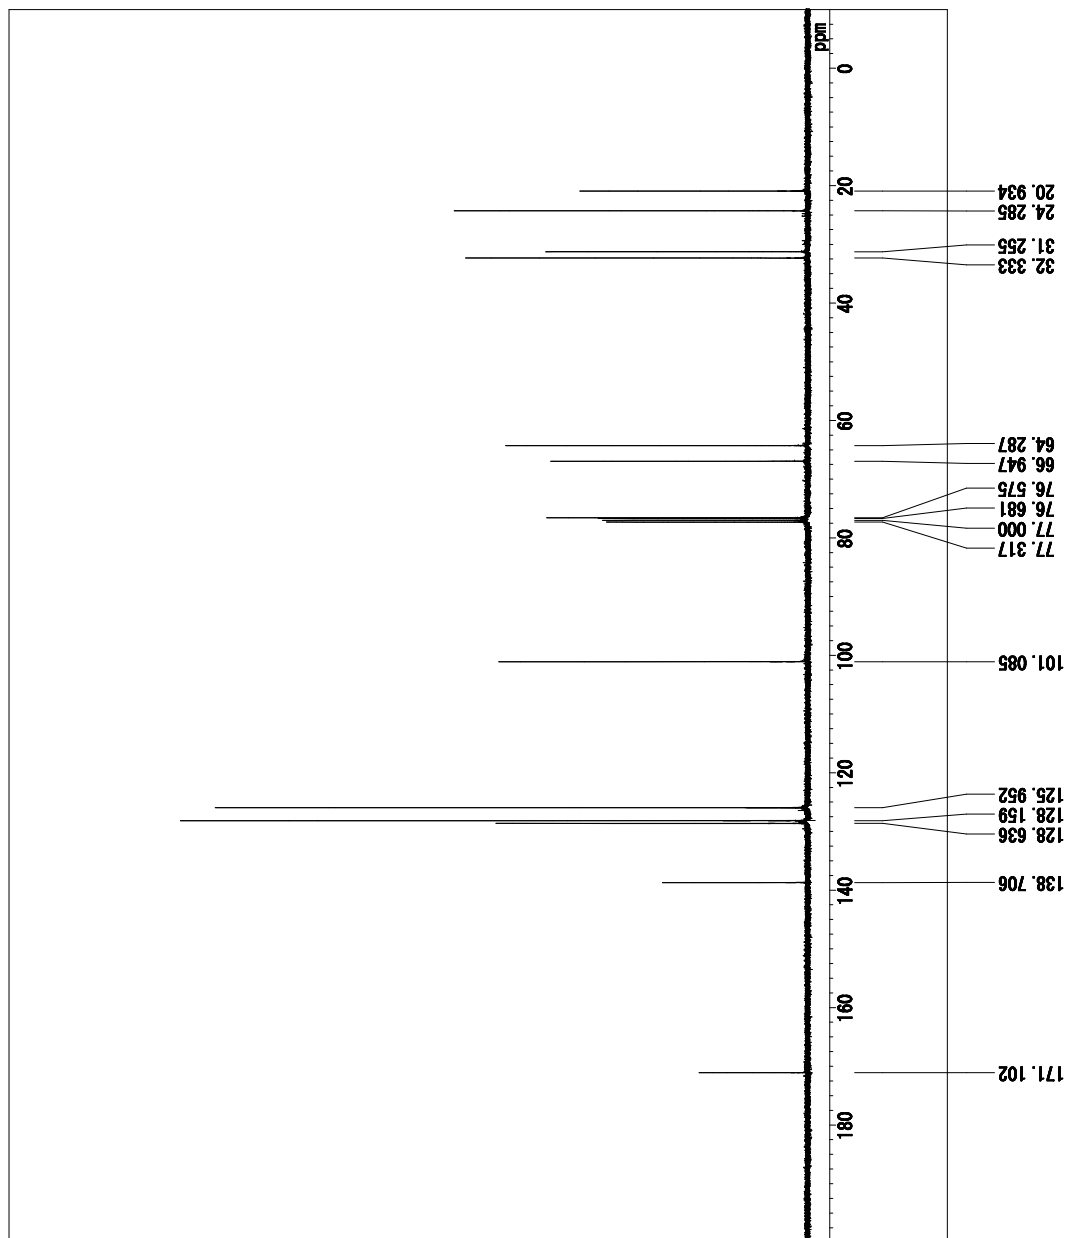

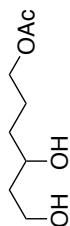

2d

Comment su20038pure-2\_20170719\_01  
 Date 2017/Jul/19  
 ObsNuc <sup>1</sup>H  
 ExMode PROTON\_001  
 ObsFreq 399.45 MHz  
 Scan 8  
 AcqTime 2.569 s  
 Acc. Interval 5.569 s  
 Spinning 16.0 Hz  
 Temperature 25.0 °C  
 Solvent cdcl<sub>3</sub>

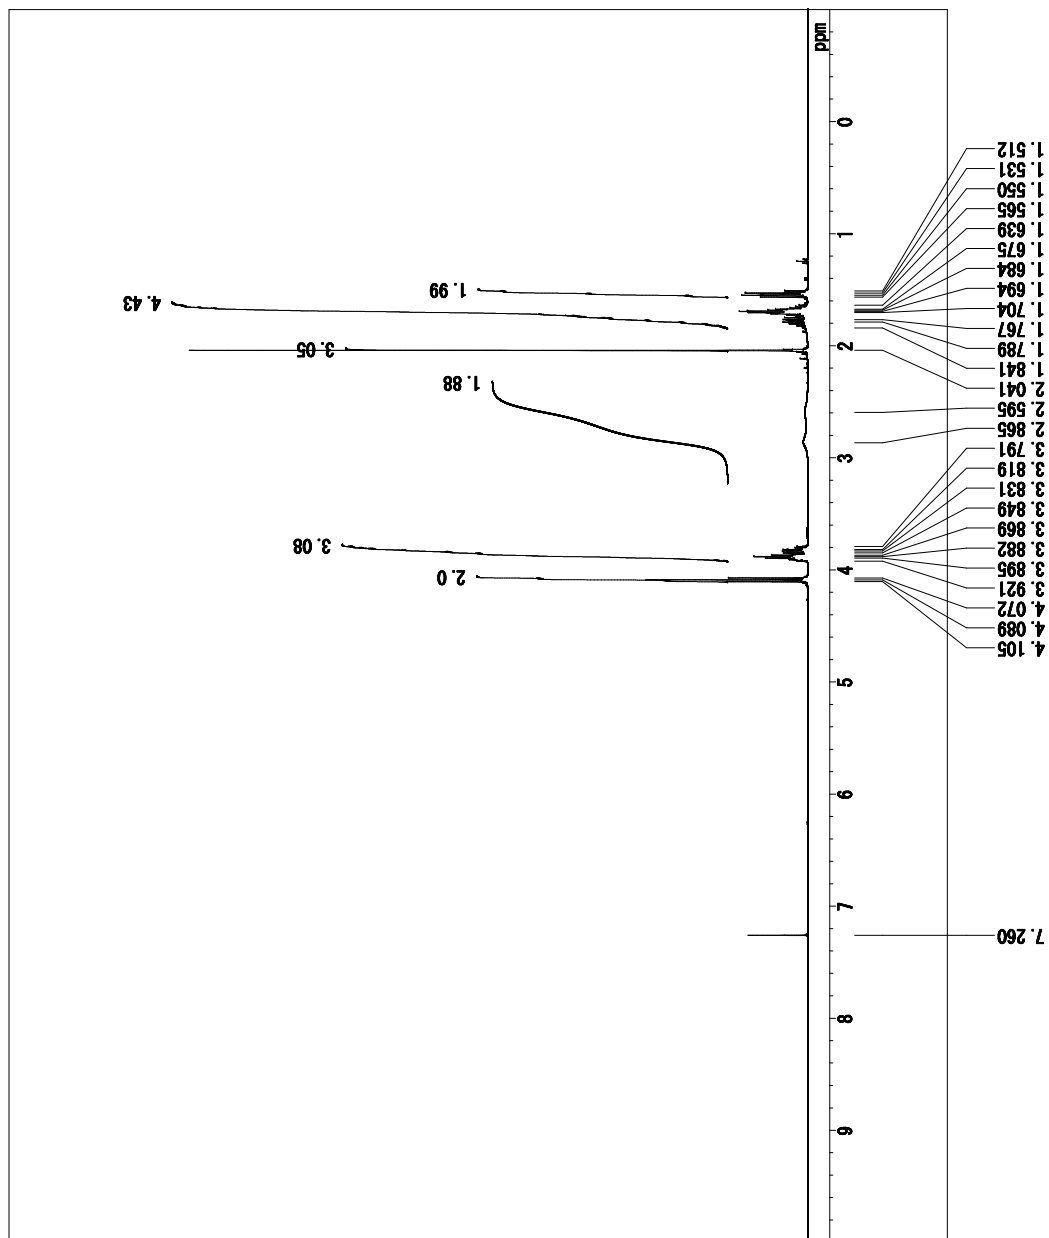

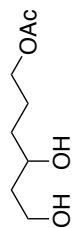

2d

Comment su20037-13C\_20170802\_01  
 Date 2017/Aug/02  
 ObsNuc <sup>13</sup>C  
 ExMode CARBON\_001  
 ObsFreq 100.66 MHz  
 Scan 464  
 AcqTime 1.3631 s  
 Acc. Interval 3.3631 s  
 Spinning 20.0 Hz  
 Temperature 25.0 °C  
 Solvent cdcl<sub>3</sub>

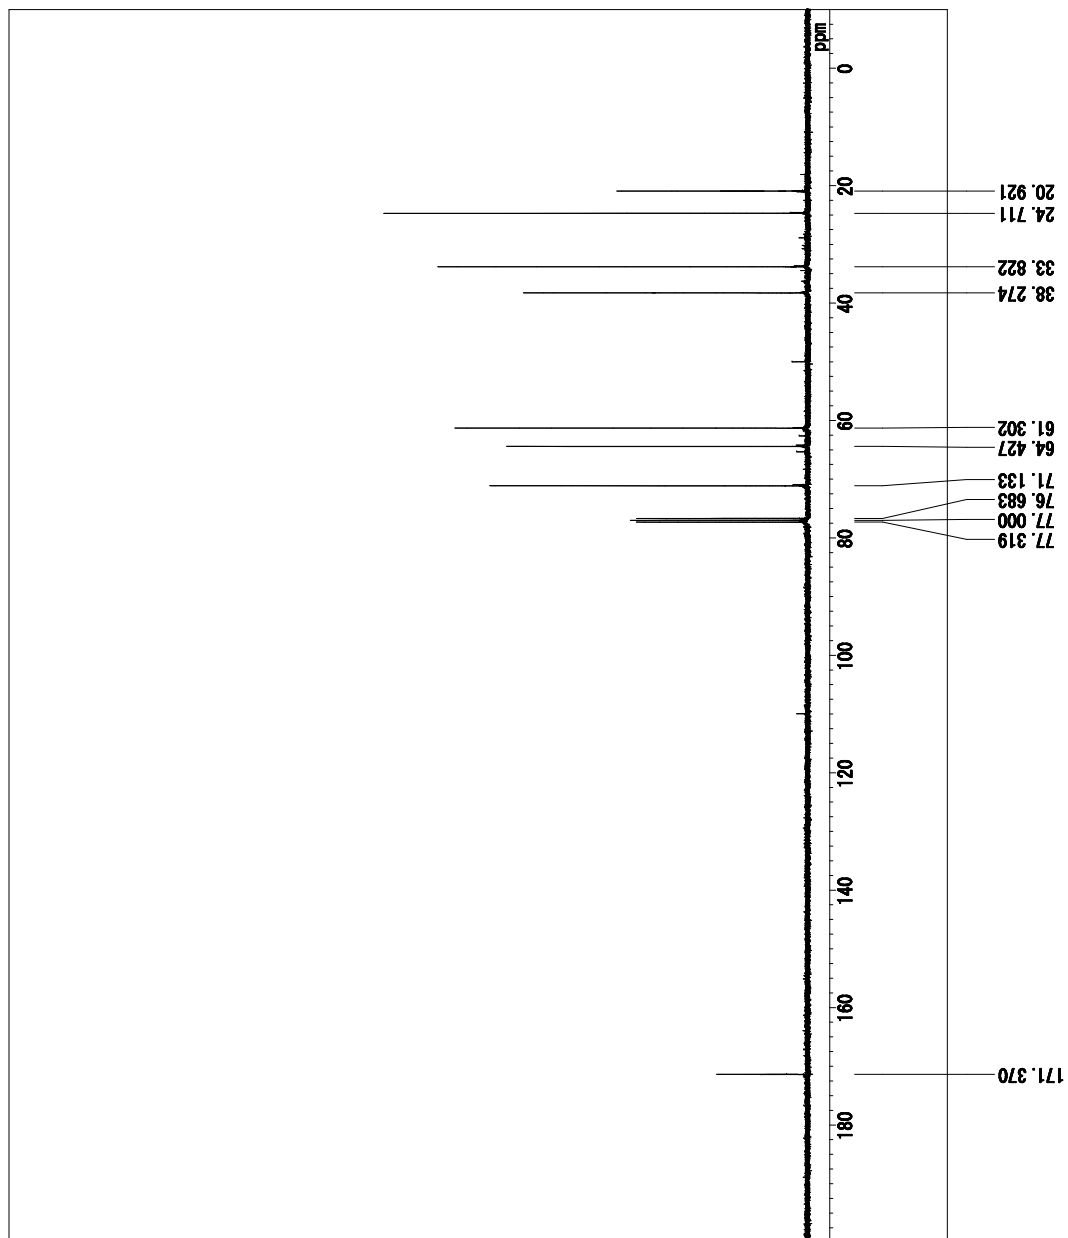

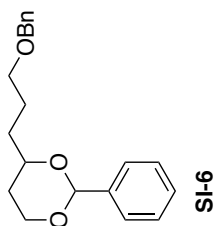

Comment su20028\_20170825\_01  
 Date 2017/Aug/25  
 ObsNuc <sup>1</sup>H  
 ExMode PROTON\_001  
 ObsFreq 400.28 MHz  
 Scan 8  
 AcqTime 2.5559 s  
 Acc. Interval 5.5559 s  
 Spinning 16.0 Hz  
 Temperature 25.0 °C  
 Solvent cdcl<sub>3</sub>

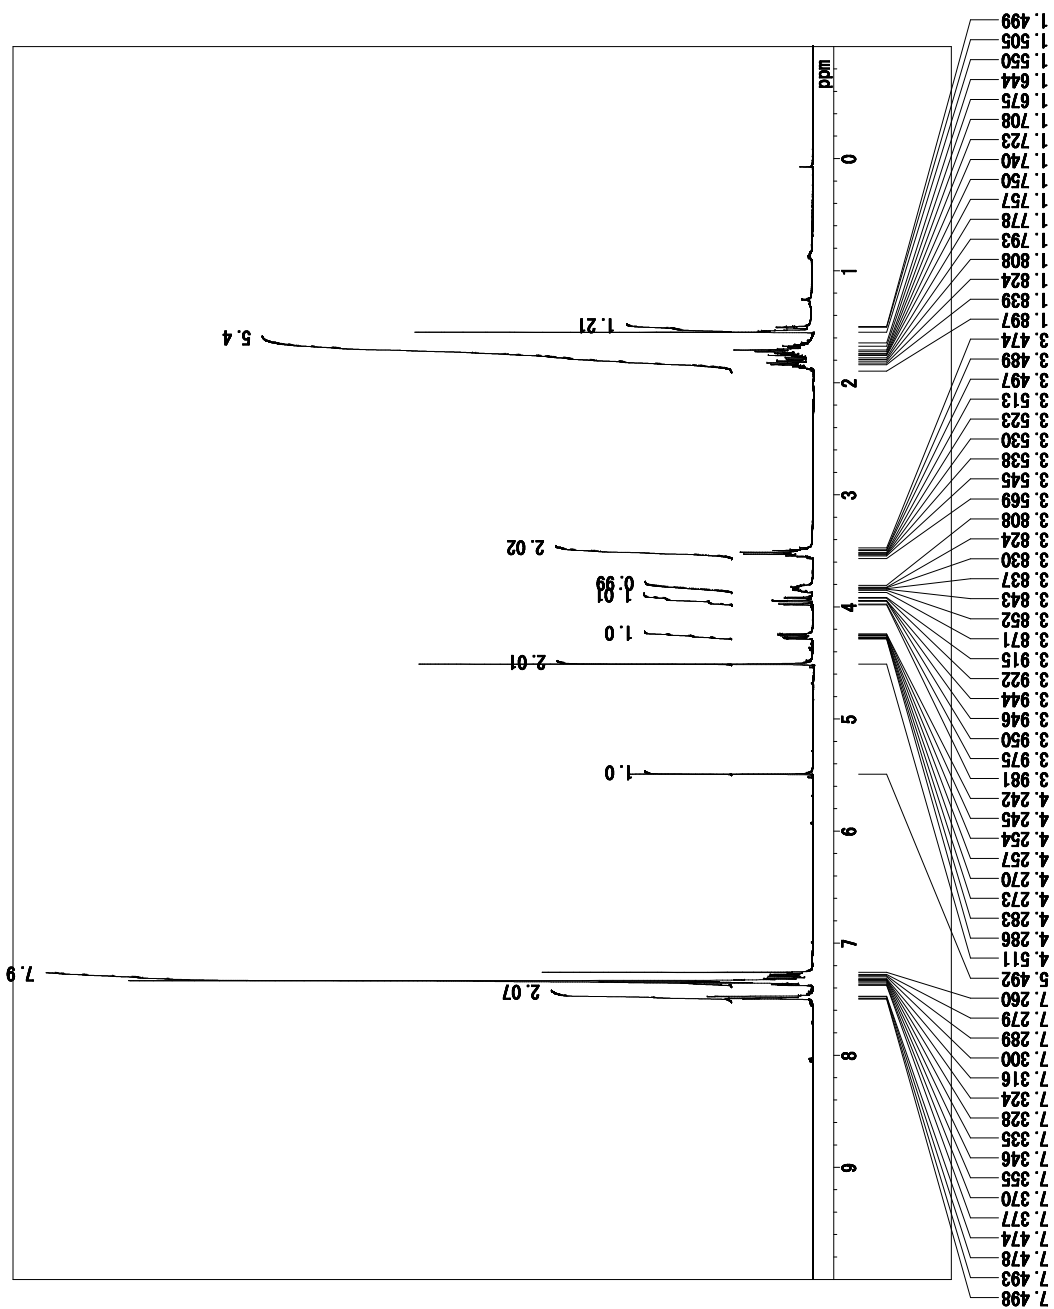

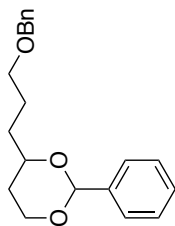

SI-6

Comment su20028-13C\_20170825\_01  
 Date 2017/Aug/25  
 ObsNuc <sup>13</sup>C  
 ExMode CARBON\_001  
 ObsFreq 100.66 MHz  
 Scan 832  
 AcqTime 1.3631 s  
 Acc. Interval 3.3631 s  
 Spinning 20.0 Hz  
 Temperature 25.0 °C  
 Solvent cdc13

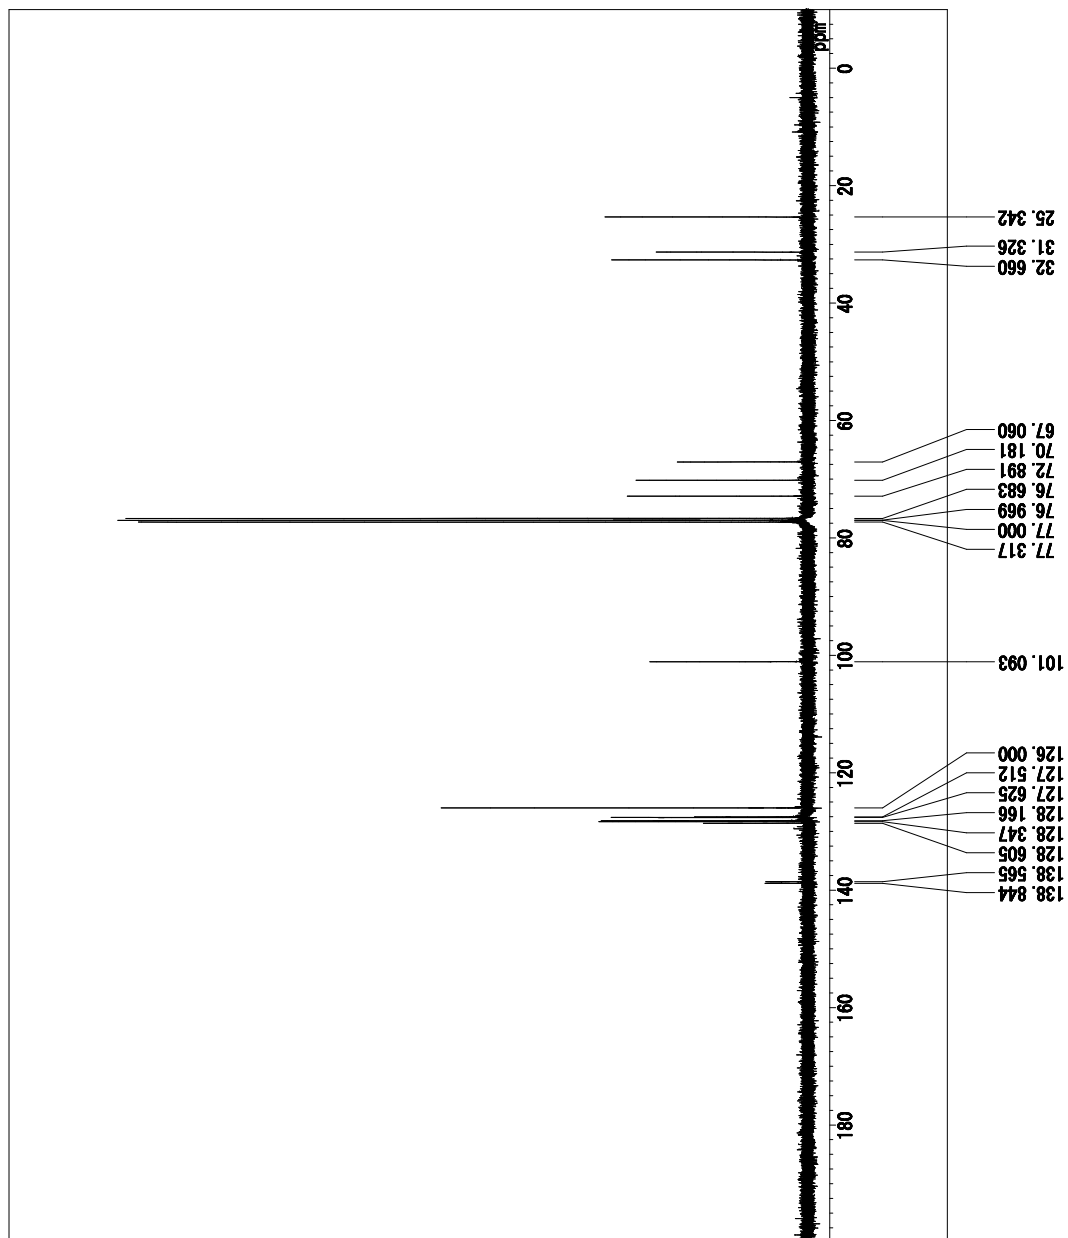



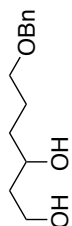

2e

Comment HRS03-20\_pure\_20170224\_01  
 Date 2017/Feb/24  
 ObsNuc <sup>1</sup>H  
 ExMode PROTON\_001  
 ObsFreq 400.28 MHz  
 Scan 8  
 AcqTime 2.5559 s  
 Acc. Interval 5.5559 s  
 Spinning 16.0 Hz  
 Temperature 25.0 °C  
 Solvent cdcl<sub>3</sub>

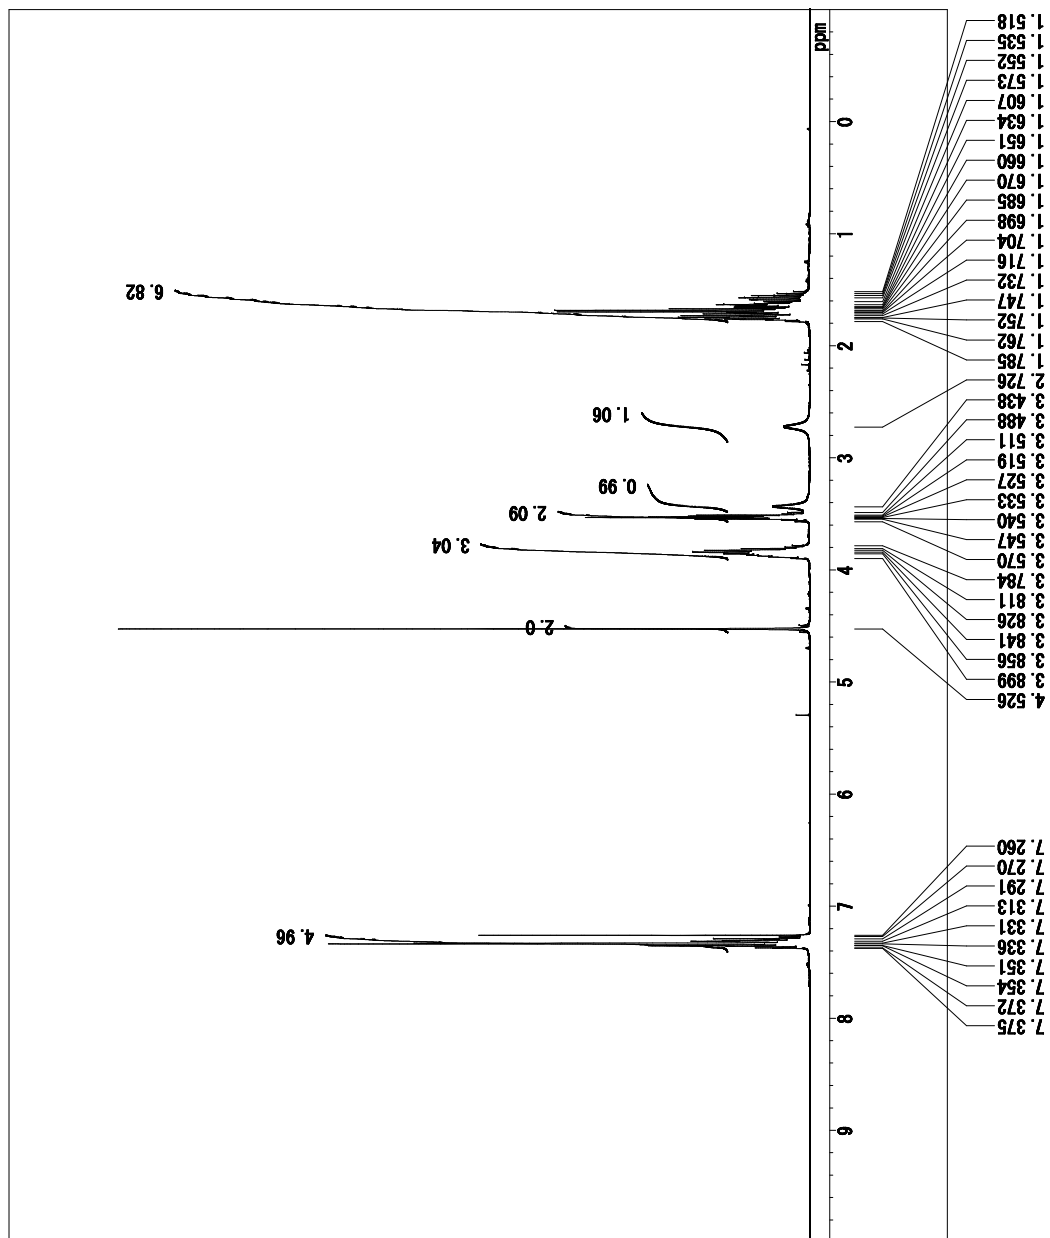

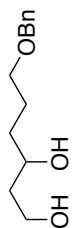

2e

Comment su-diolOBn-13C\_20170919\_01  
 Date 2017/Sep/19  
 ObsNuc <sup>13</sup>C  
 ExMode CARBON\_001  
 ObsFreq 100.66 MHz  
 Scan 864  
 AcqTime 1.3631 s  
 Acc. Interval 3.3631 s  
 Spinning 20.0 Hz  
 Temperature 25.0 °C  
 Solvent cdcl<sub>3</sub>

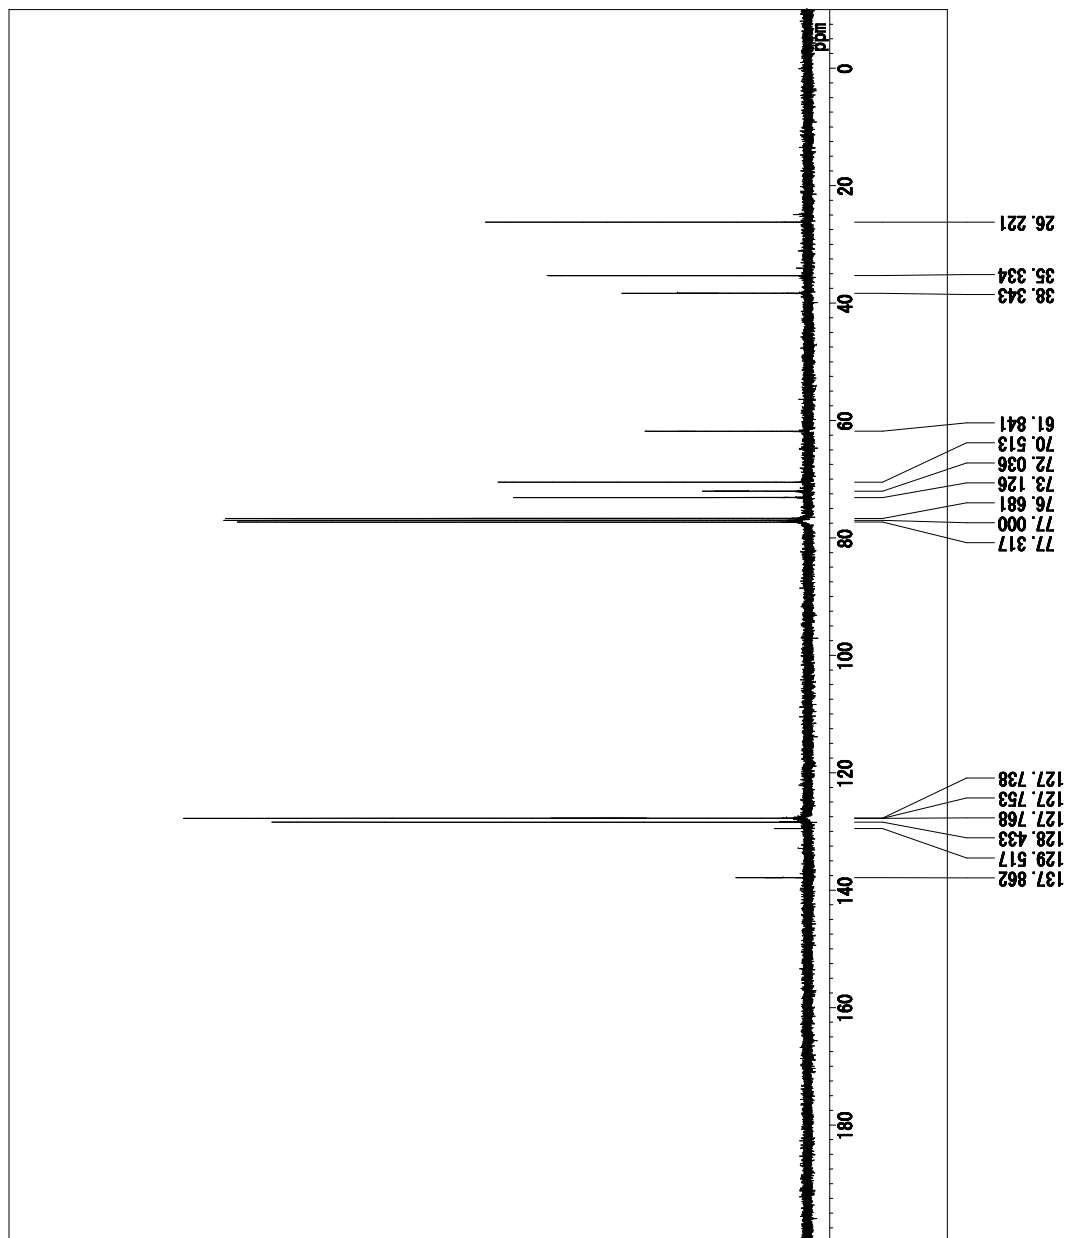

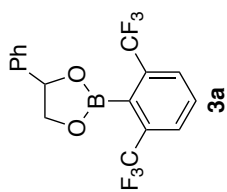

Comment HRS02-10\_pure\_20160831\_01  
 Date 2016/Aug/31  
 ObsNuc <sup>1</sup>H  
 ExMode PROTON\_001  
 ObsFreq 400.28 MHz  
 Scan 8  
 AcqTime 2.5559 s  
 Acc. Interval 5.5559 s  
 Spinning 16.0 Hz  
 Temperature 30.0 °C  
 Solvent cdc13

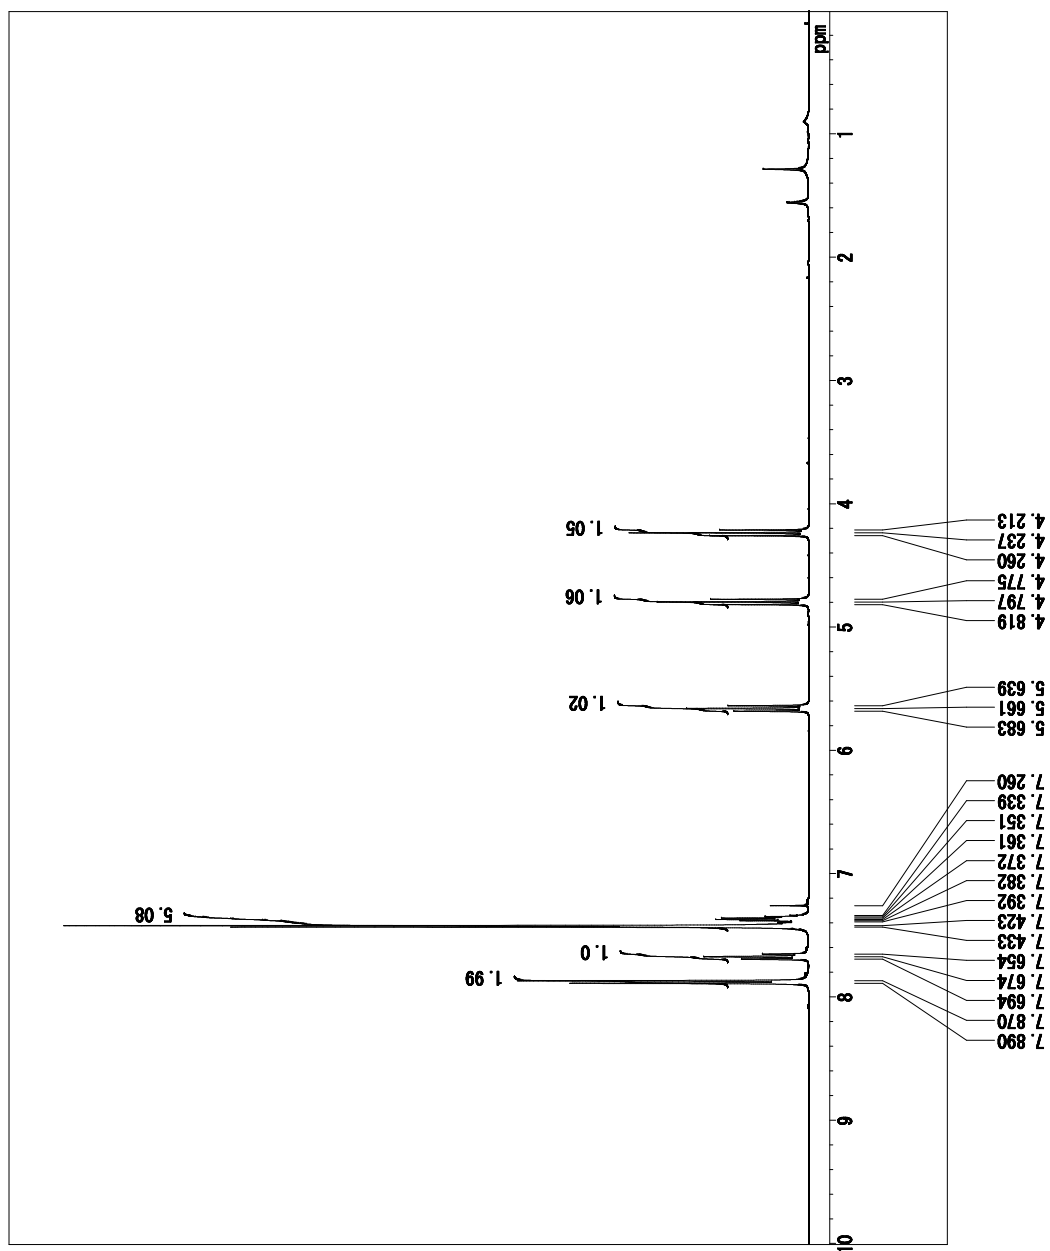



Comment HRS02-10\_C\_20160831\_01  
 Date 2016/Aug/31  
 ObsNuc <sup>13</sup>C  
 ExMode CARBON\_001  
 ObsFreq 100.45 MHz  
 Scan 512  
 AcqTime 1.3631 s  
 Acc. Interval 3.3631 s  
 Spinning 20.0 Hz  
 Temperature 25.0 °C  
 Solvent cdcl<sub>3</sub>

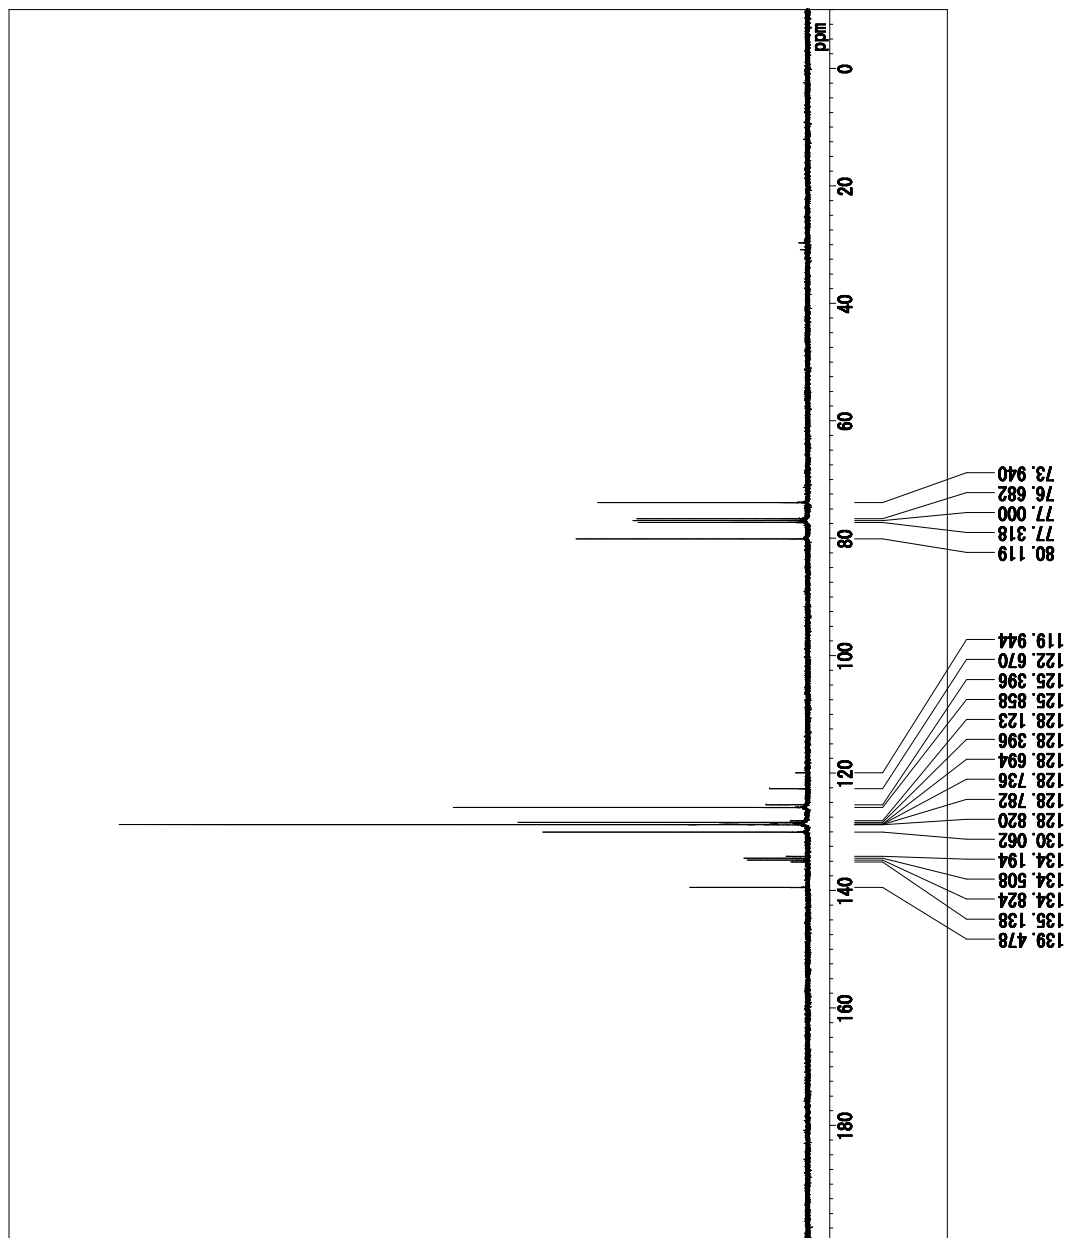

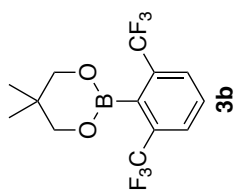

Comment hrs01040\_20160804\_01  
 Date 2016/Aug/04  
 ObsNuc <sup>1</sup>H  
 ExMode PROTON\_001  
 ObsFreq 399.45 MHz  
 Scan 8  
 AcqTime 2.569 s  
 Acc. Interval 5.569 s  
 Spinning 16.0 Hz  
 Temperature 25.0 °C  
 Solvent cdc13

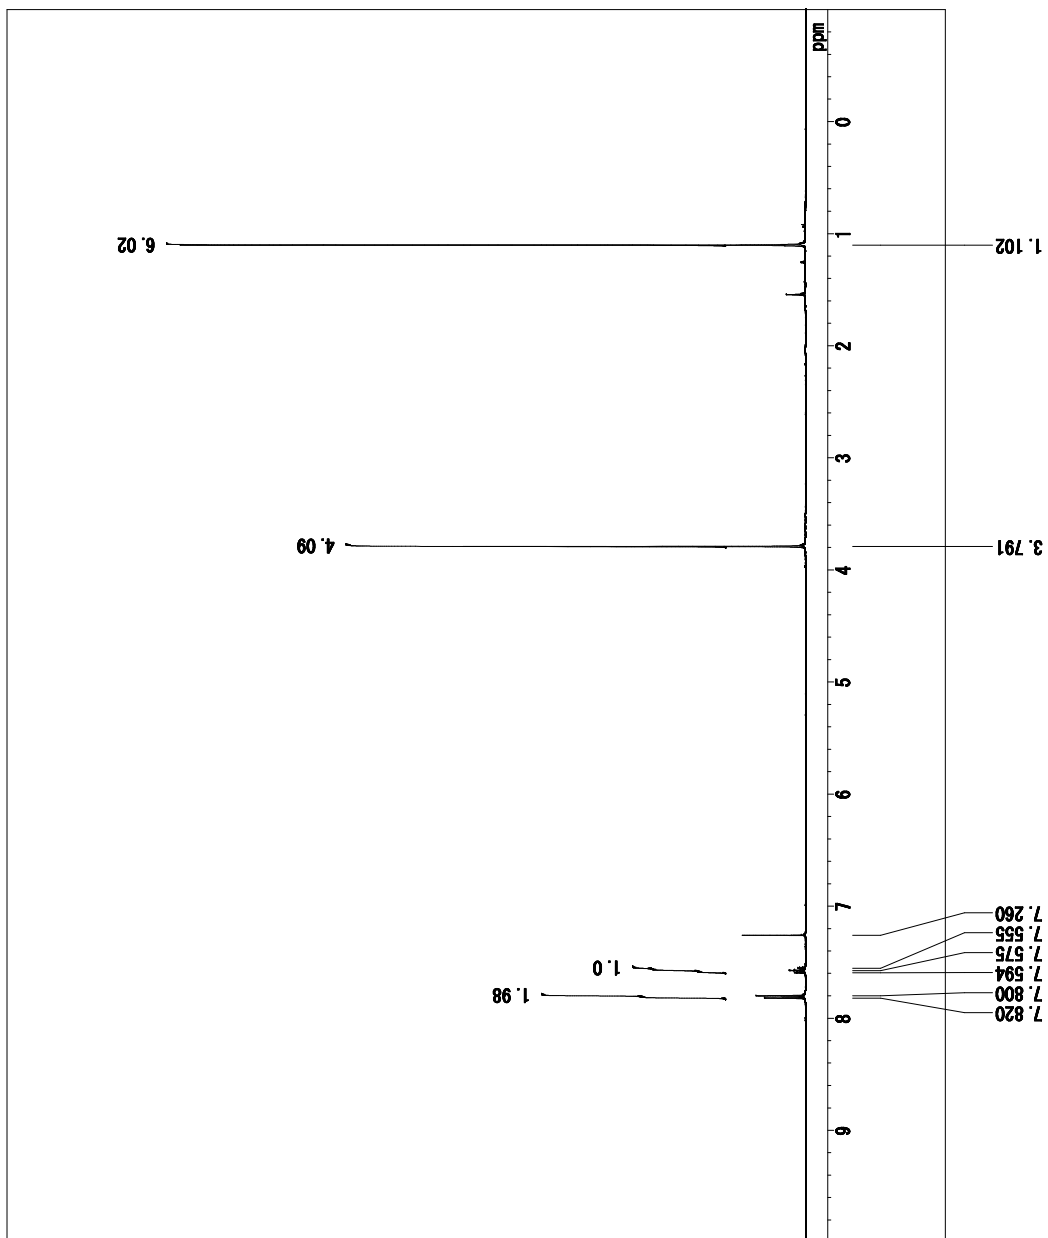

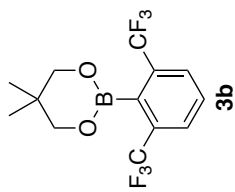

Comment hrs01040-13C\_20160804\_01  
 Date 2016/Aug/04  
 ObsNuc <sup>13</sup>C  
 ExMode CARBON\_001  
 ObsFreq 100.66 MHz  
 Scan 512  
 AcqTime 1.3631 s  
 Acc. Interval 3.3631 s  
 Spinning 20.0 Hz  
 Temperature 25.0 °C  
 Solvent cdc13

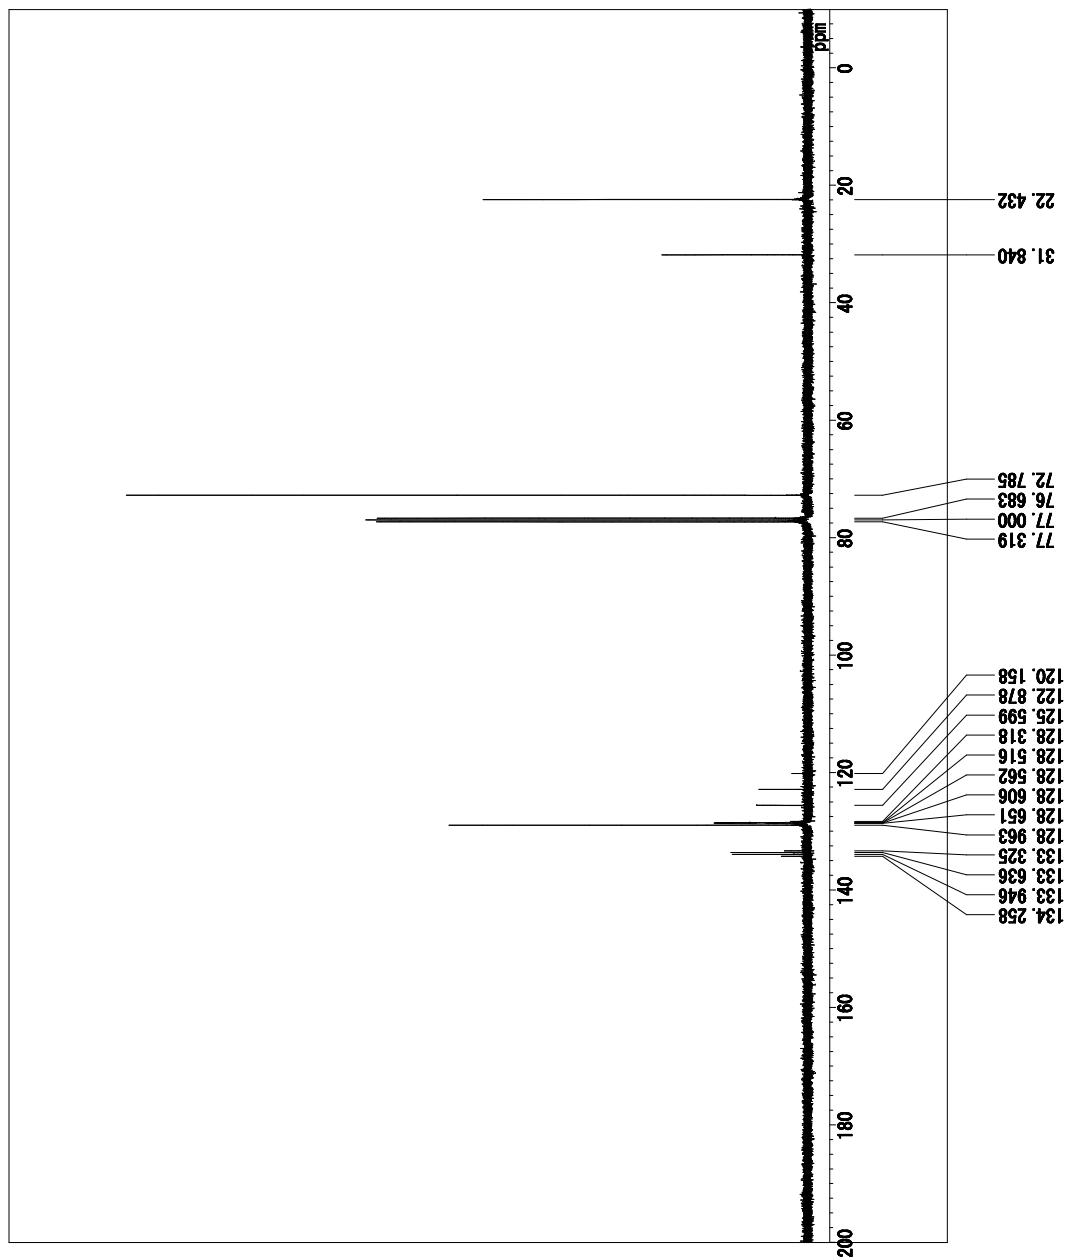

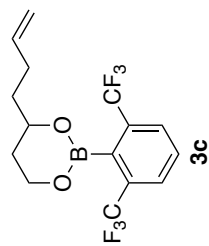

Comment sul4007crude\_20160910\_01  
 Date 2016/Sep/10  
 ObsNuc <sup>1</sup>H  
 ExMode PROTON\_001  
 ObsFreq 400.28 MHz  
 Scan 8  
 AcqTime 2.5559 s  
 Acc. Interval 5.5559 s  
 Spinning 16.0 Hz  
 Temperature 30.0 °C  
 Solvent cdcl<sub>3</sub>

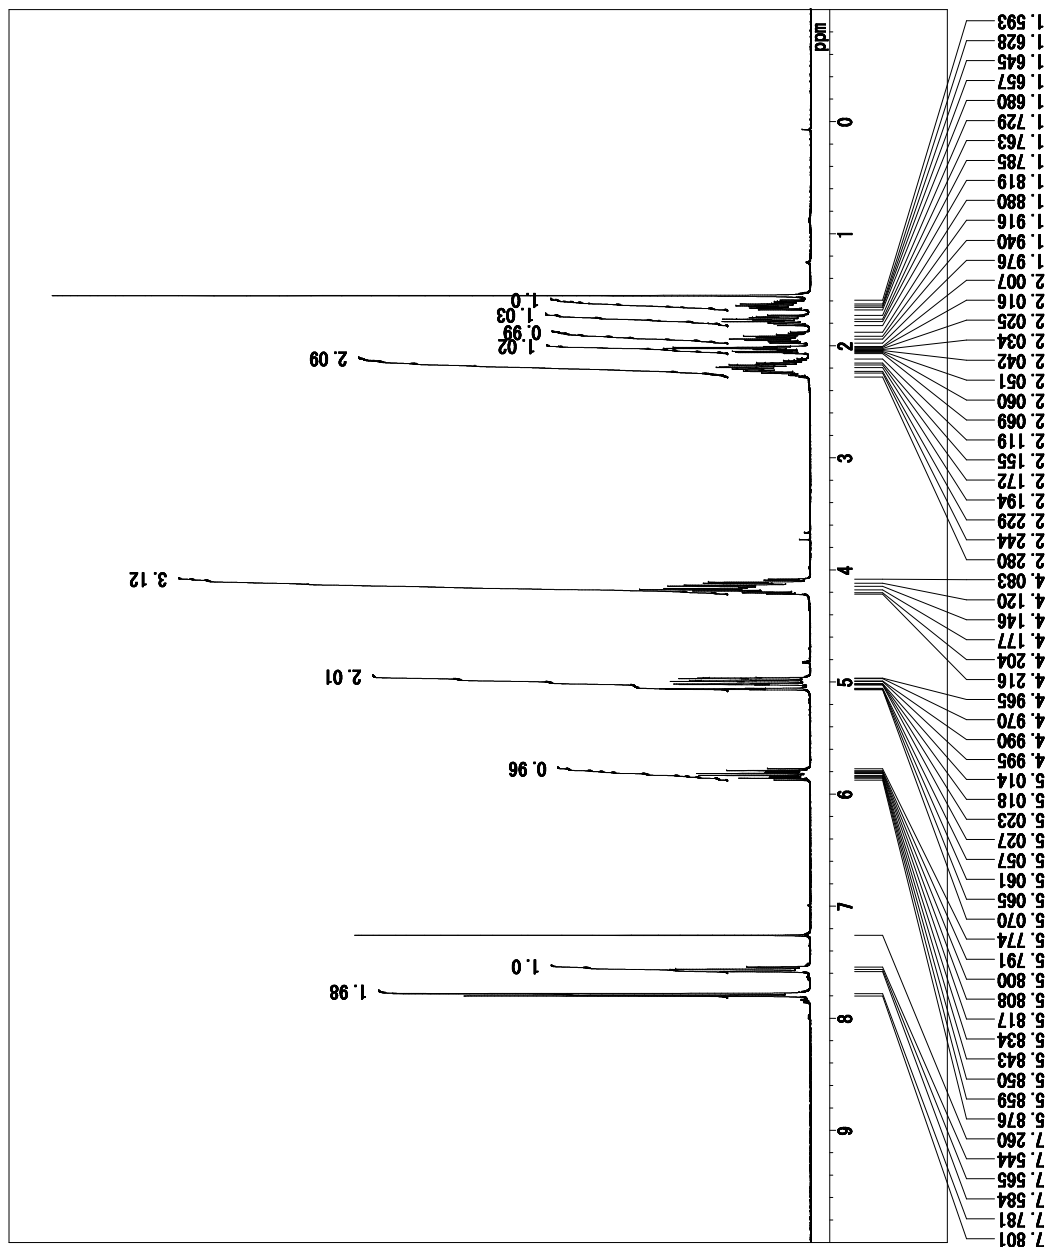

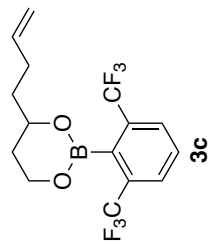

Comment sul4007-<sup>13</sup>C\_20160911\_01  
 Date 2016/Sep/11  
 ObsNuc <sup>13</sup>C  
 ExMode CARBON\_001  
 ObsFreq 100.66 MHz  
 Scan 512  
 AcqTime 1.3631 s  
 Acc. Interval 3.3631 s  
 Spinning 20.0 Hz  
 Temperature 30.0 °C  
 Solvent cdc13

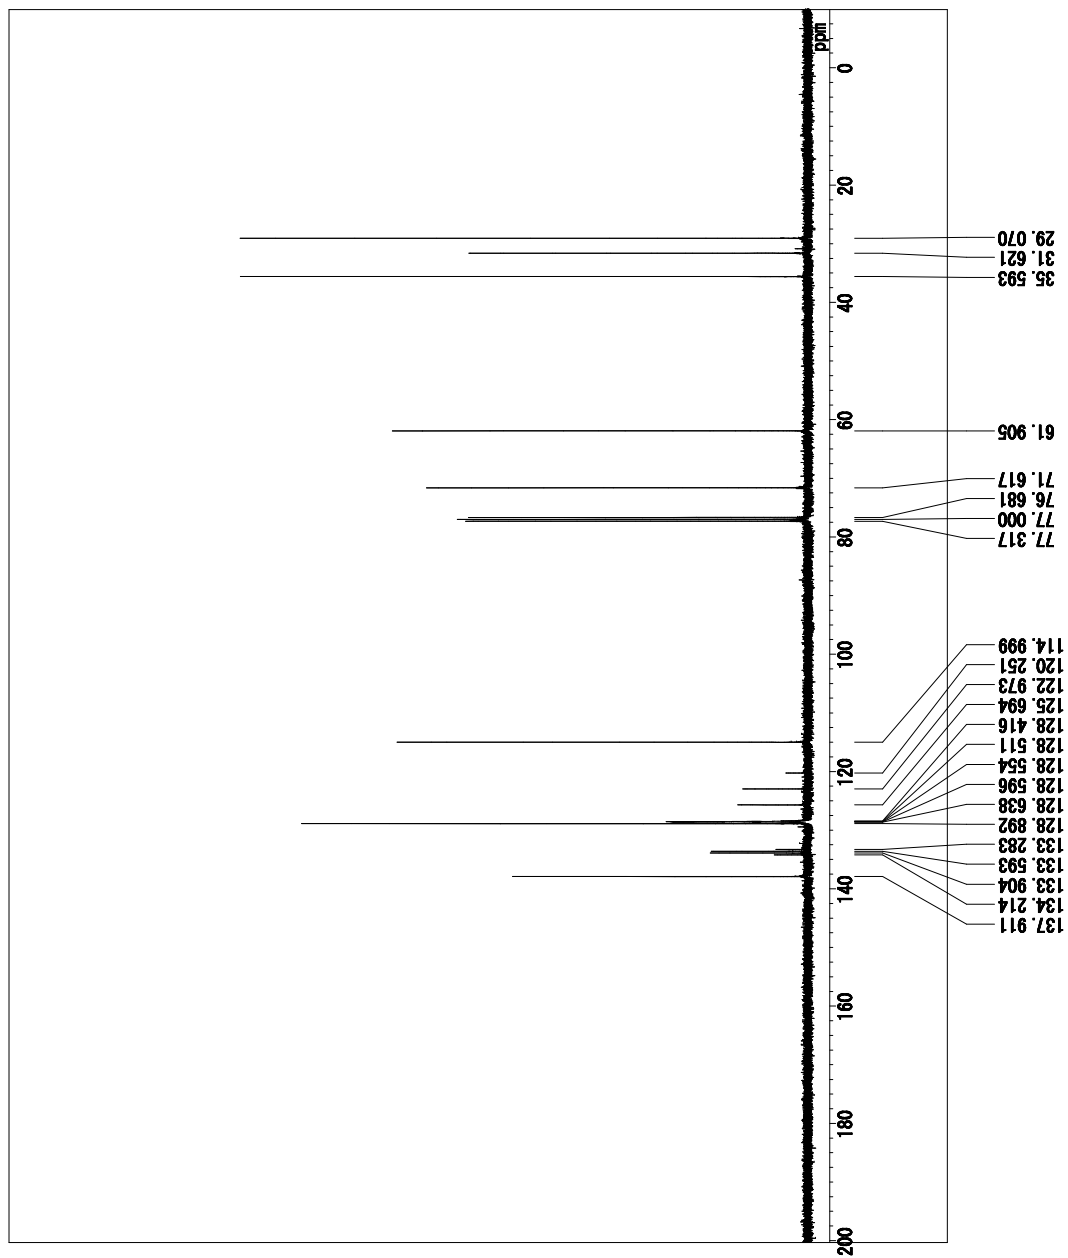



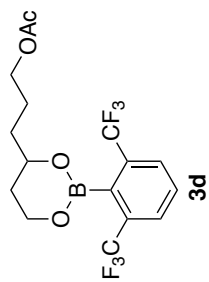

Comment NO-02-34pure-Ac-5\_28\_20150  
 528\_01  
 Date 2015/May/28  
 ObsNuc <sup>1</sup>H  
 Exlcode PROTON\_001  
 ObsFreq 399.45 MHz  
 Scan 16  
 AcqTime 2.569 s  
 Acc. Interval 5.569 s  
 Spinning 16.0 Hz  
 Temperature 3.0 °C  
 Solvent cdcl<sub>3</sub>

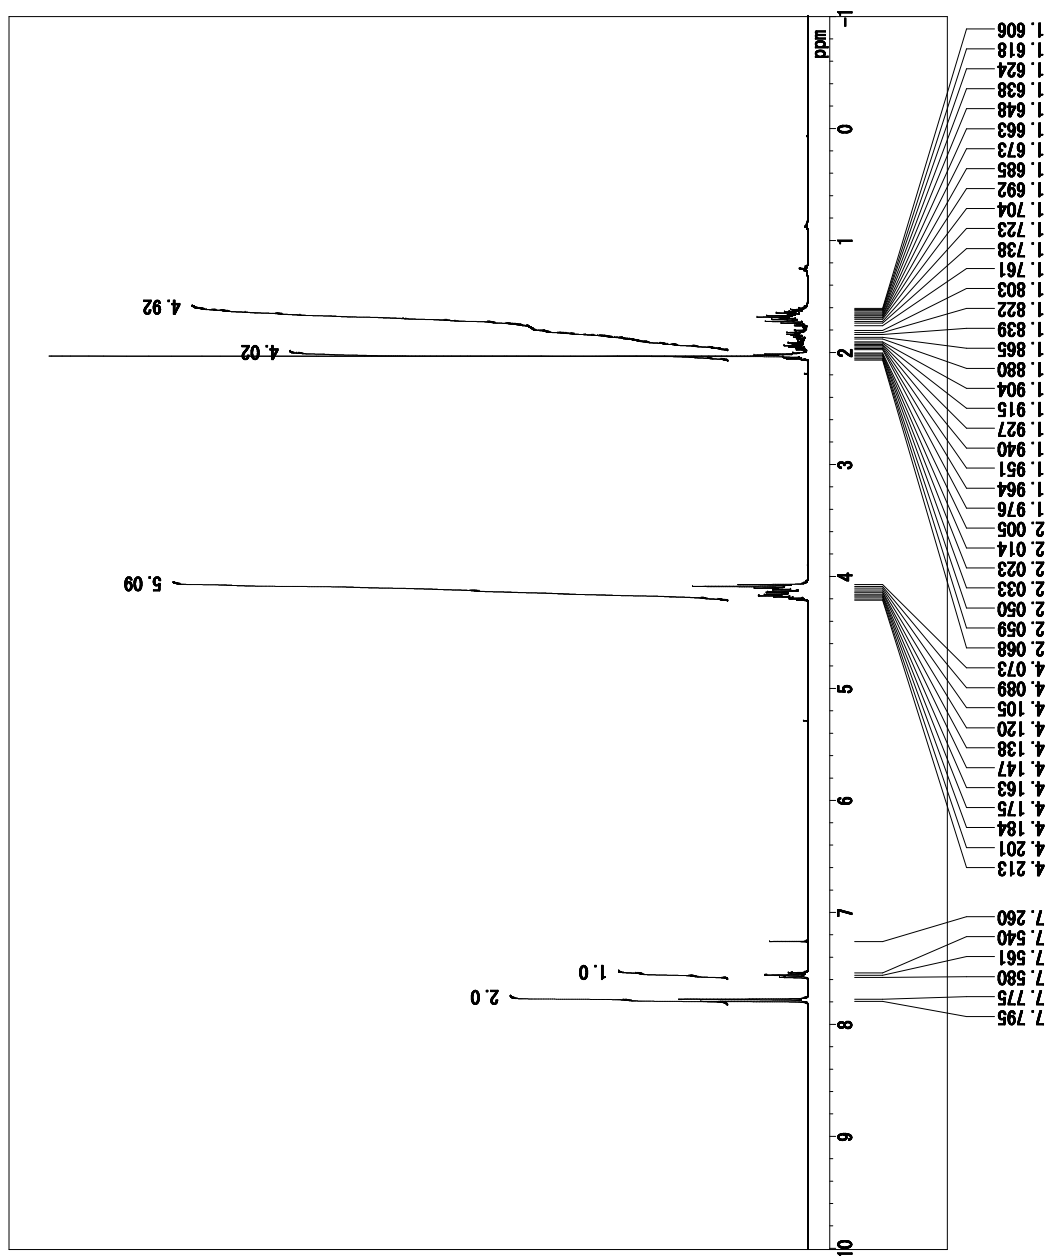

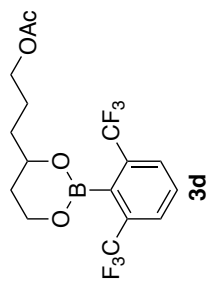

Comment NO-Ac-C-20150419\_03  
 Date 2015/Apr/19  
 ObsNuc <sup>13</sup>C  
 ExMode CARBON\_001  
 ObsFreq 100.66 MHz  
 Scan 512  
 AcqTime 1.3631 s  
 Acc. Interval 3.3631 s  
 Spinning 20.0 Hz  
 Temperature 25.0 °C  
 Solvent cdc13

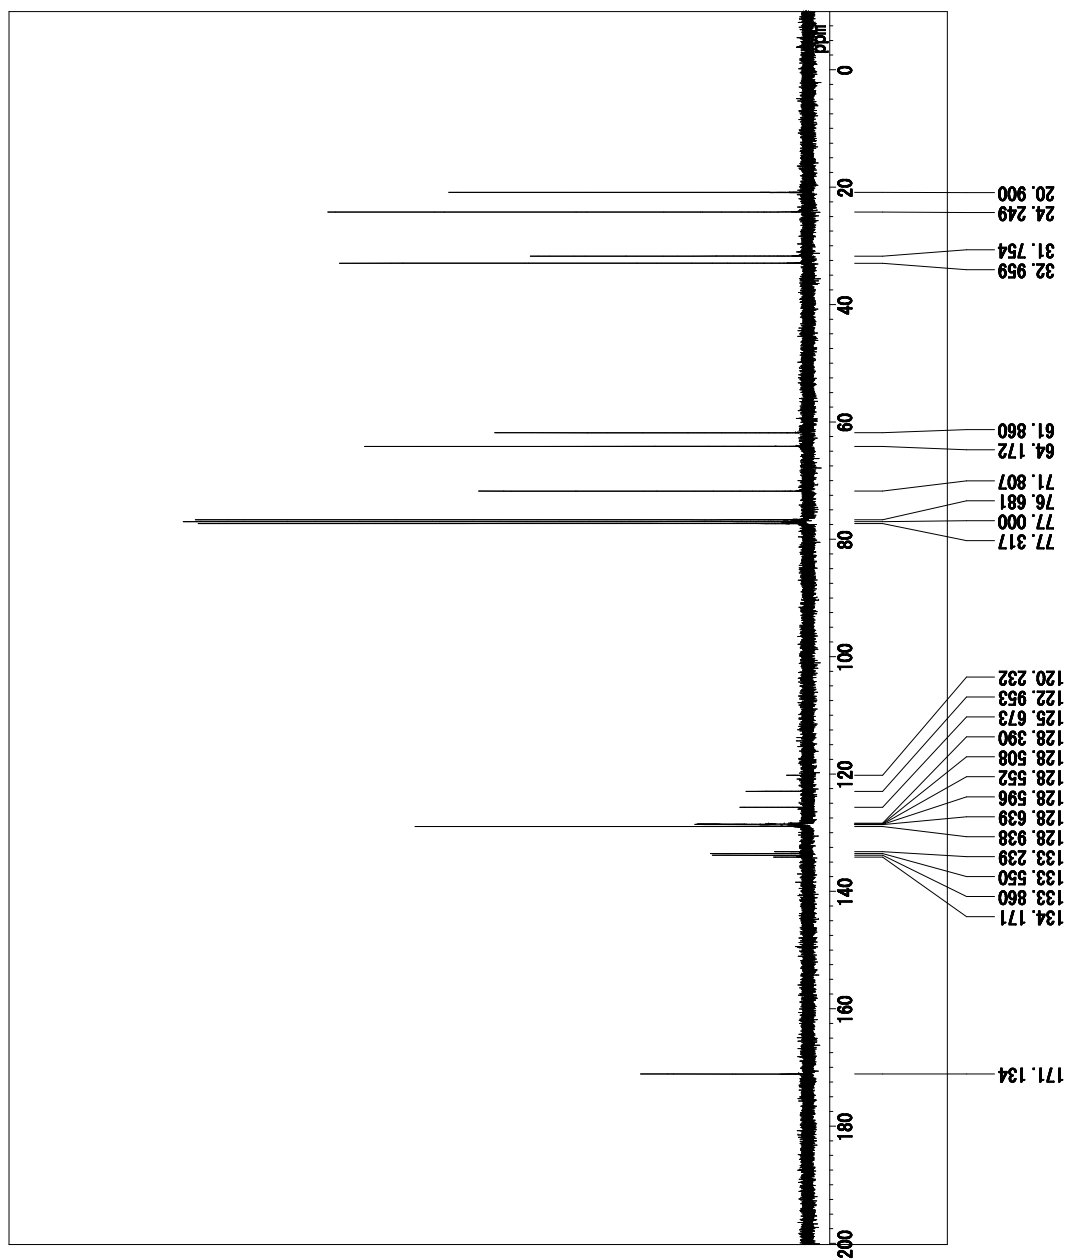

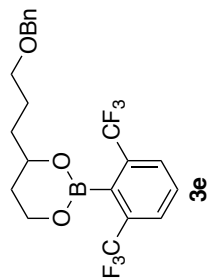

Comment sul0001pure-2  
 Date 2016/Aug/01  
 ObsNuc <sup>1</sup>H  
 ExMode PROTON\_001  
 ObsFreq 399.45 MHz  
 Scan 8  
 AcqTime 2.569 s  
 Acc. Interval 5.569 s  
 Spinning 16.0 Hz  
 Temperature 25.0 °C  
 Solvent cdcl<sub>3</sub>

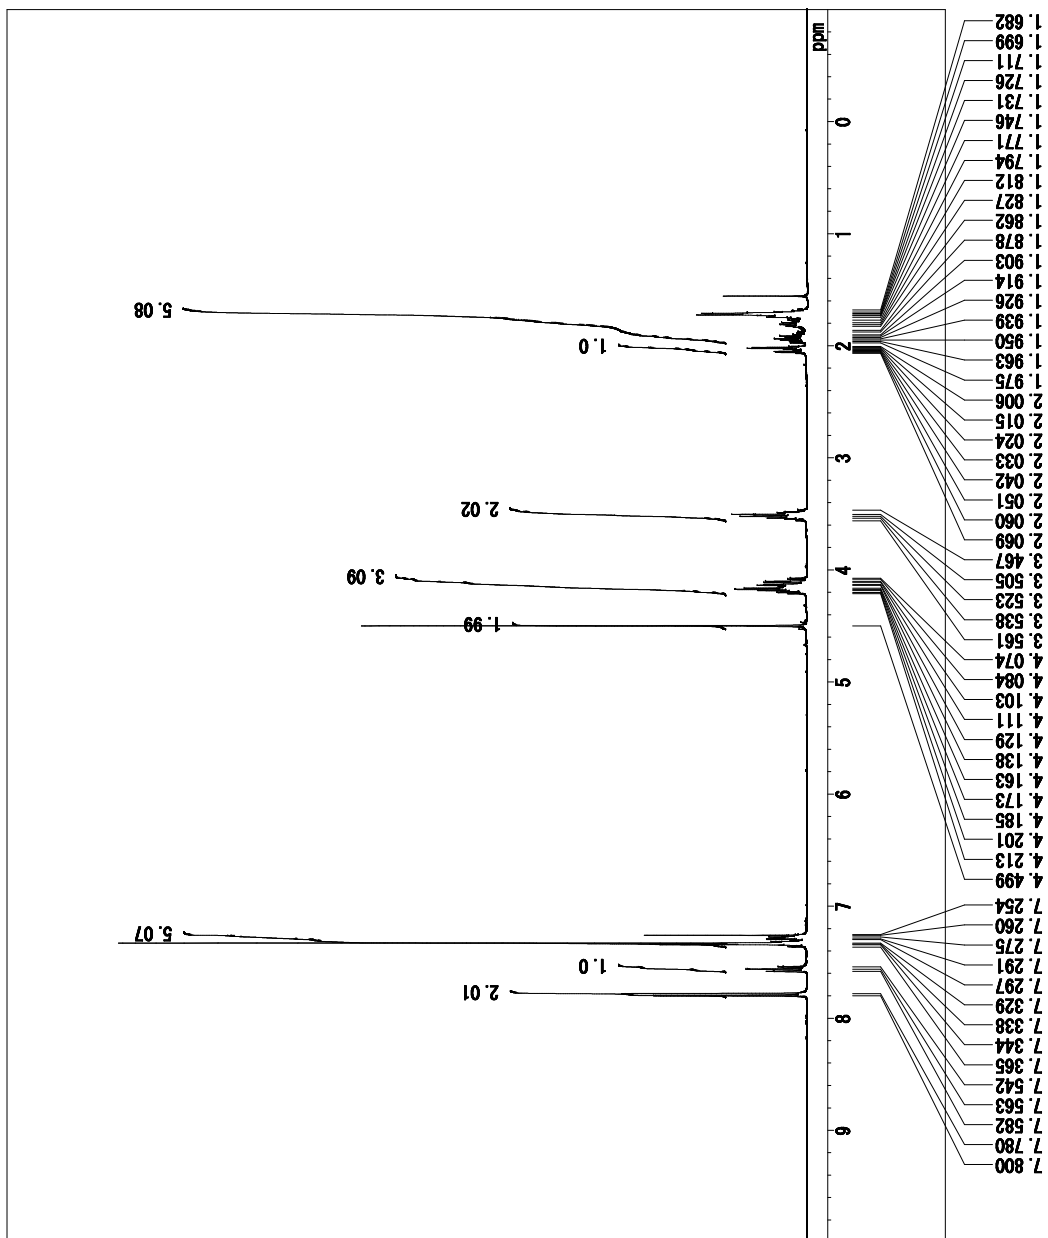

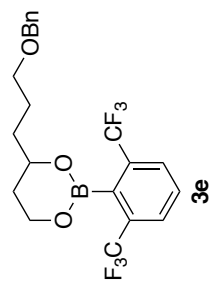

Comment sul0001pure\_20160730\_01  
 Date 2016/Jul/30  
 ObsNuc <sup>13</sup>C  
 ExMode CARBON\_001  
 ObsFreq 100.45 MHz  
 Scan 512  
 AcqTime 1.3631 s  
 Acc. Interval 3.3631 s  
 Spinning 20.0 Hz  
 Temperature 25.0 °C  
 Solvent cdcl<sub>3</sub>

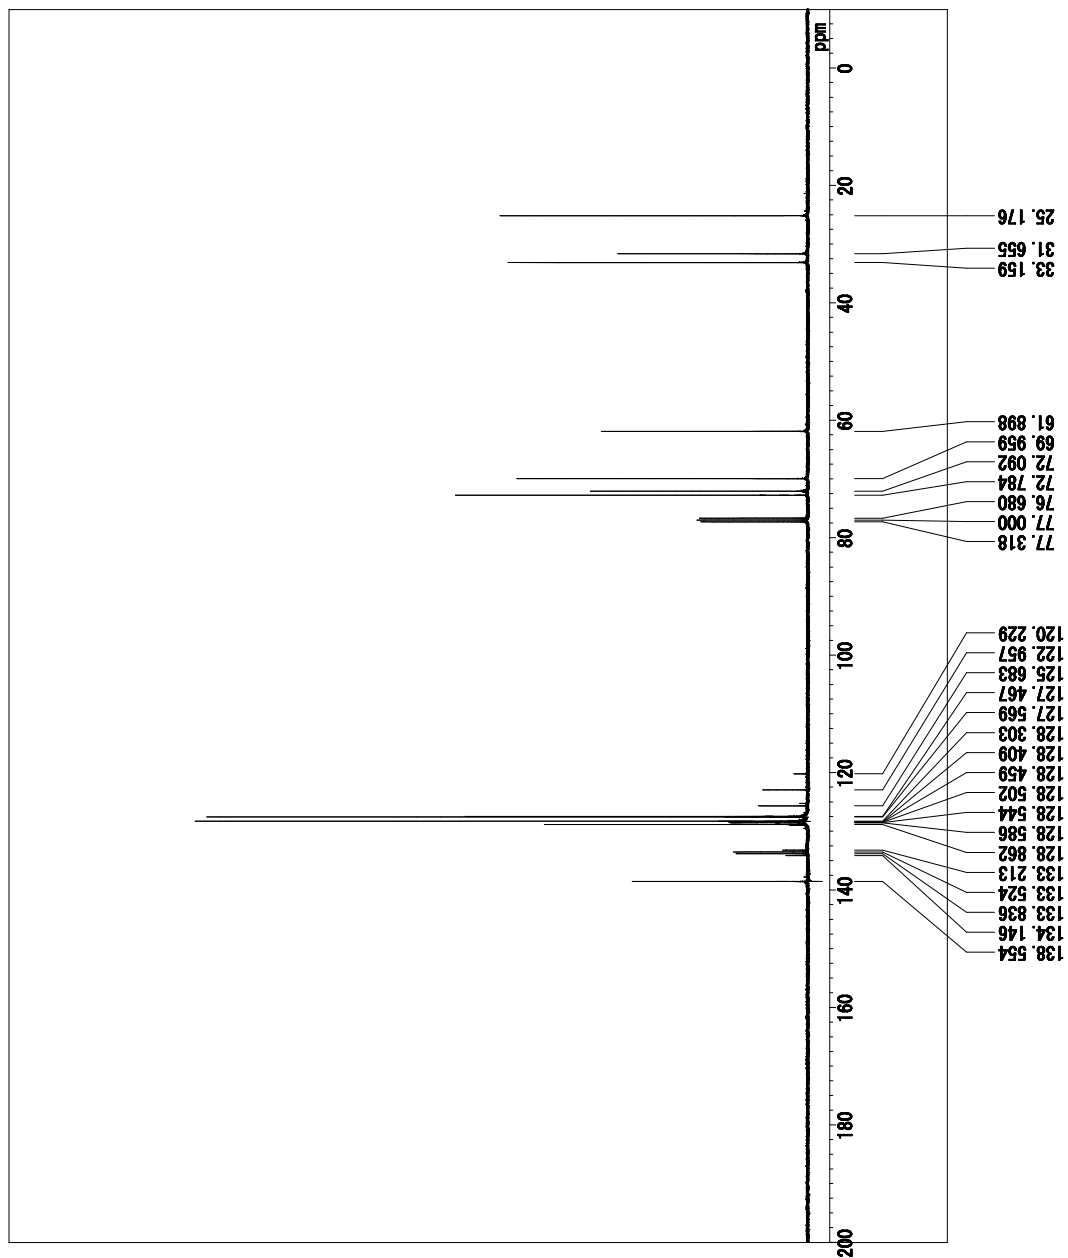

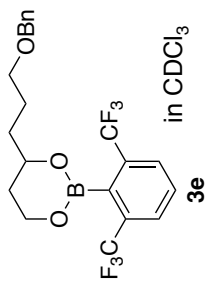

Comment  
 Date 2018/Aug/31  
 ObsNuc <sup>1</sup>H  
 ExMode s2pul  
 ObsFreq 128.31 MHz  
 Scan 80  
 AcqTime 0.3211 s  
 Acc. Interval 2.0 s  
 Spinning 20.0 Hz  
 Temperature 50.0 °C  
 Solvent cdcl<sub>3</sub>

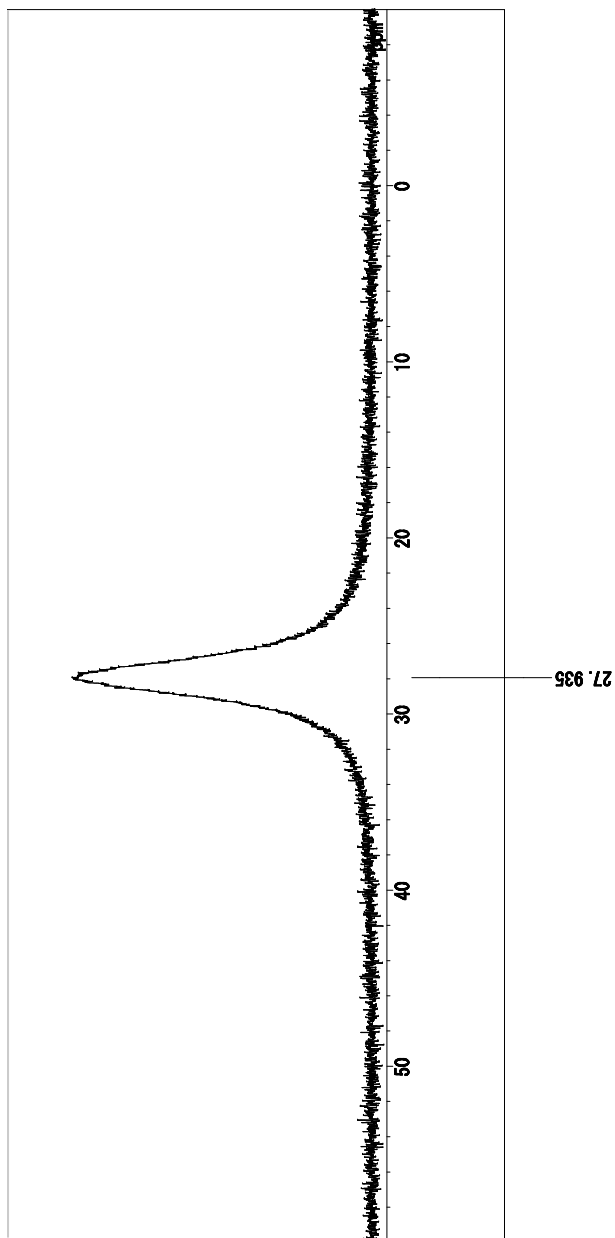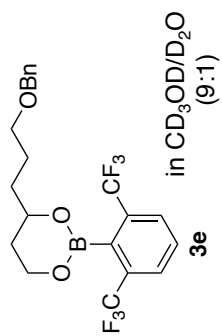

Comment  
 Date 2018/Sep/01  
 ObsNuc <sup>1</sup>H  
 ExMode s2pul  
 ObsFreq 128.31 MHz  
 Scan 80  
 AcqTime 0.3211 s  
 Acc. Interval 2.0 s  
 Spinning 20.0 Hz  
 Temperature 50.0 °C  
 Solvent cd<sub>3</sub>od

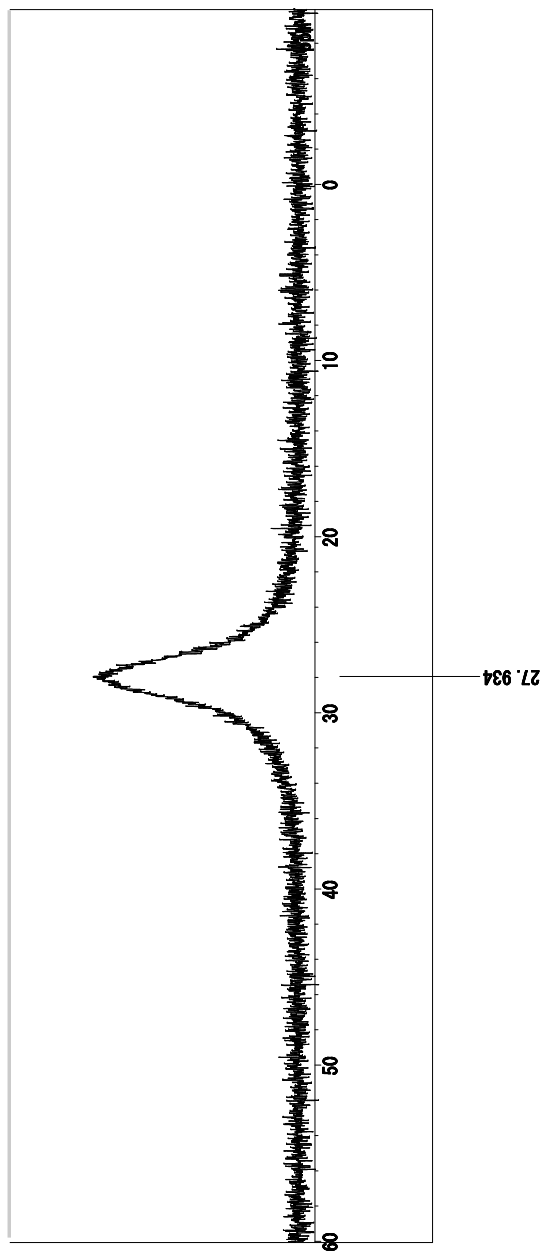

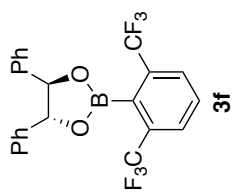

Comment HRS02-09\_pure\_20160901\_01  
 Date 2016/Sep/01  
 ObsNuc <sup>1</sup>H  
 ExMode PROTON\_001  
 ObsFreq 400.28 MHz  
 Scan 8  
 AcqTime 2.5559 s  
 Acc. Interval 5.5559 s  
 Spinning 16.0 Hz  
 Temperature 30.0 °C  
 Solvent cdcl<sub>3</sub>

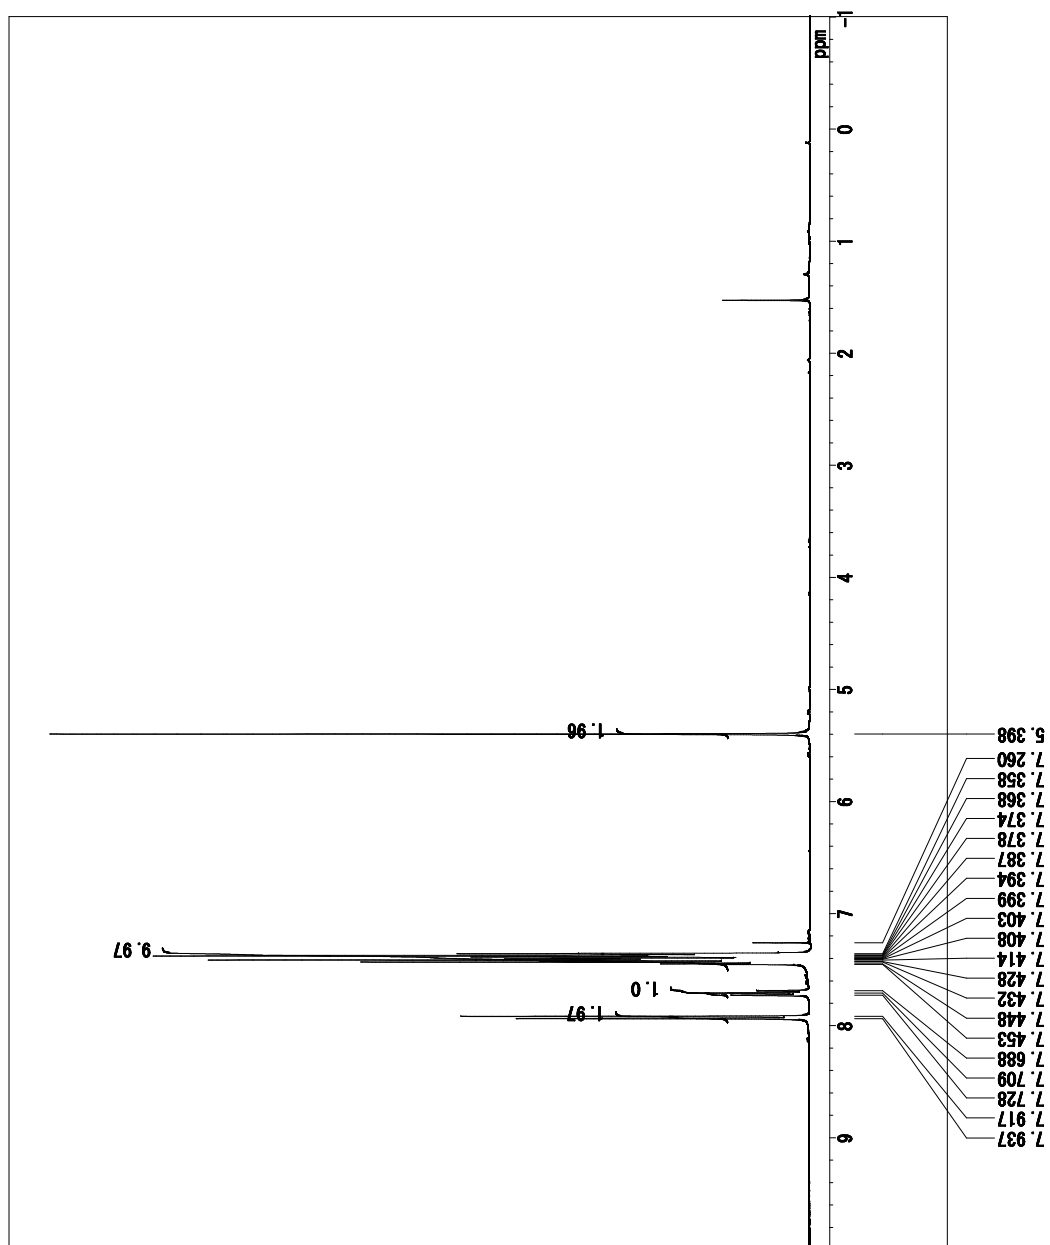

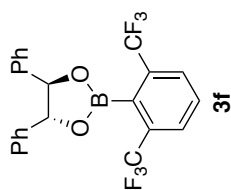

Comment HRS02-09\_C\_20160905\_01  
 Date 2016/Sep/05  
 ObsNuc <sup>13</sup>C  
 ExMode CARBON\_001  
 ObsFreq 100.45 MHz  
 Scan 512  
 AcqTime 1.3631 s  
 Acc. Interval 3.3631 s  
 Spinning 20.0 Hz  
 Temperature 25.0 °C  
 Solvent cdc13

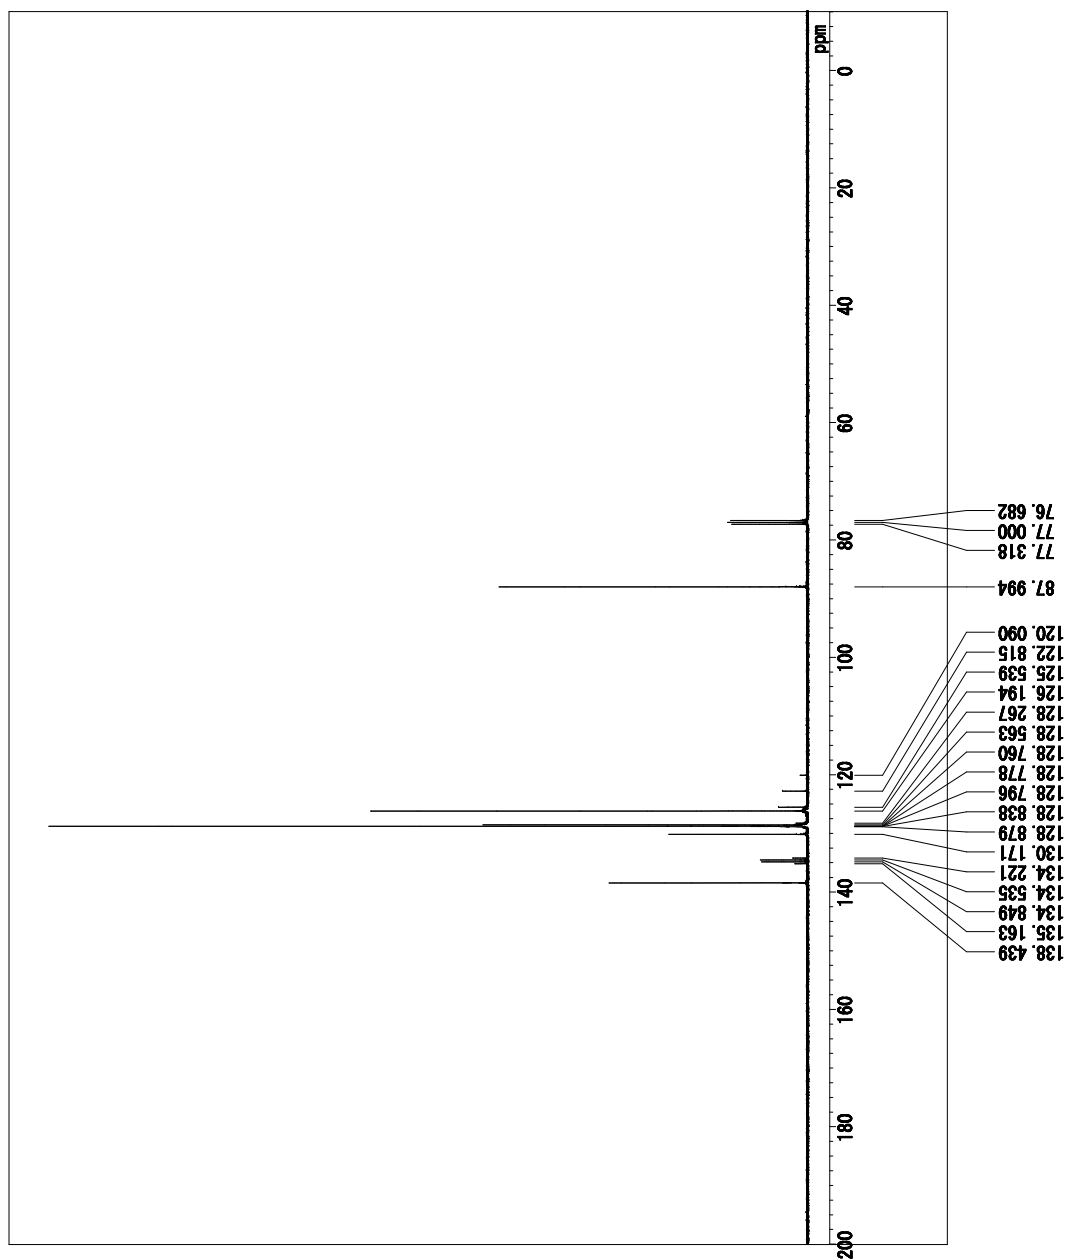

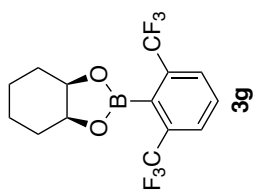

Comment HRS01-35\_pure2\_20160906\_01  
 Date 2016/Sep/06  
 ObsNuc <sup>1</sup>H  
 ExMode PROTON\_001  
 ObsFreq 400.28 MHz  
 Scan 8  
 AcqTime 2.5559 s  
 Acc. Interval 5.5559 s  
 Spinning 16.0 Hz  
 Temperature 30.0 °C  
 Solvent cdcl<sub>3</sub>

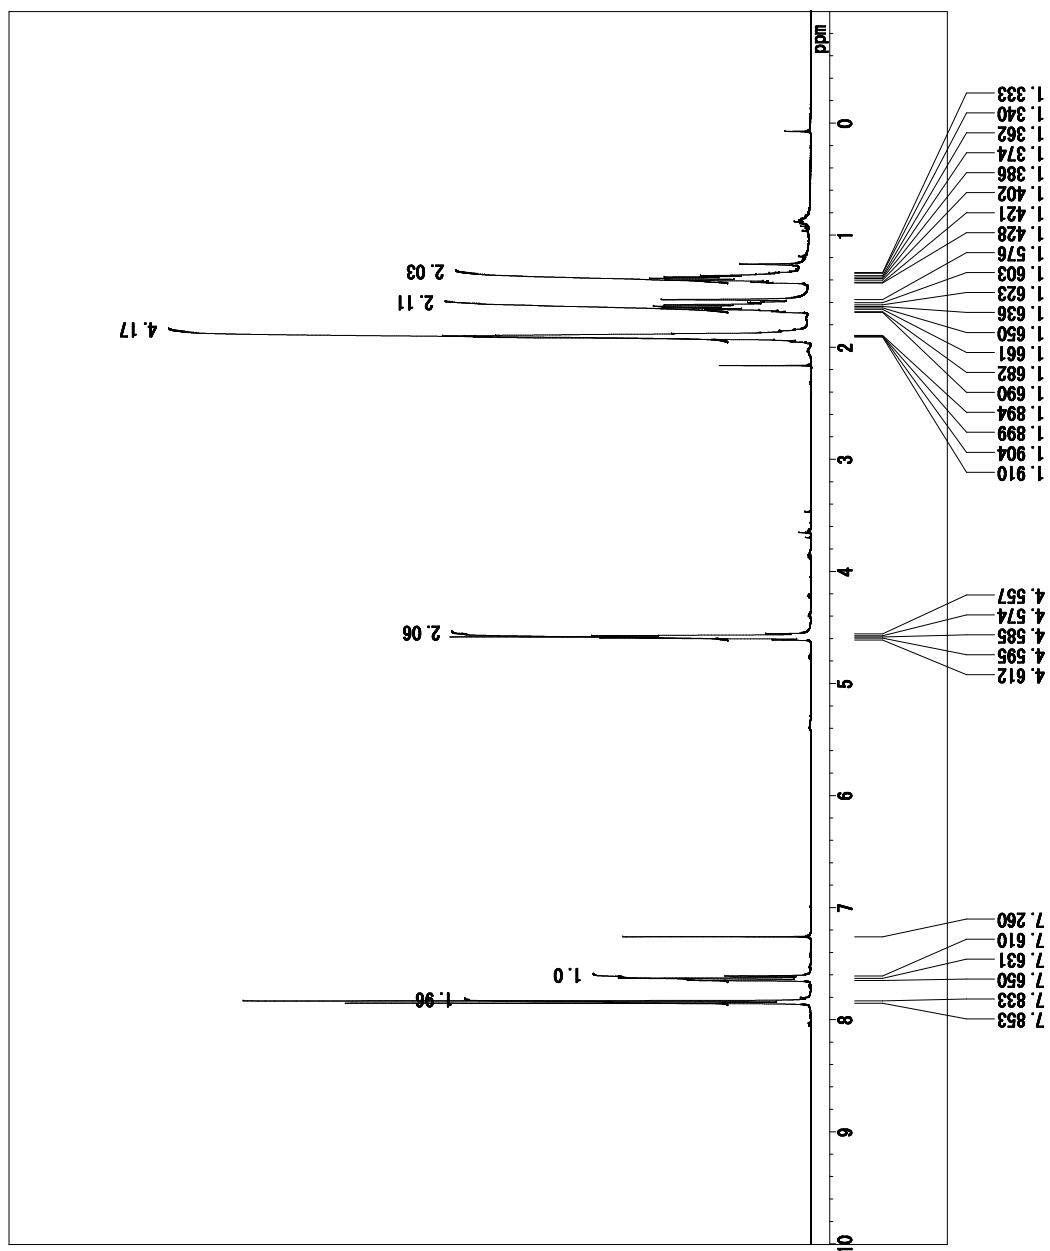



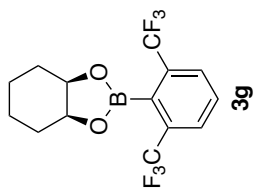

Comment HRS01-35\_C\_20160907\_01  
 Date 2016/Sep/07  
 ObsNuc <sup>13</sup>C  
 ExMode CARBON\_001  
 ObsFreq 100.45 MHz  
 Scan 512  
 AcqTime 1.3631 s  
 Acc. Interval 3.3631 s  
 Spinning 20.0 Hz  
 Temperature 25.0 °C  
 Solvent cdc13

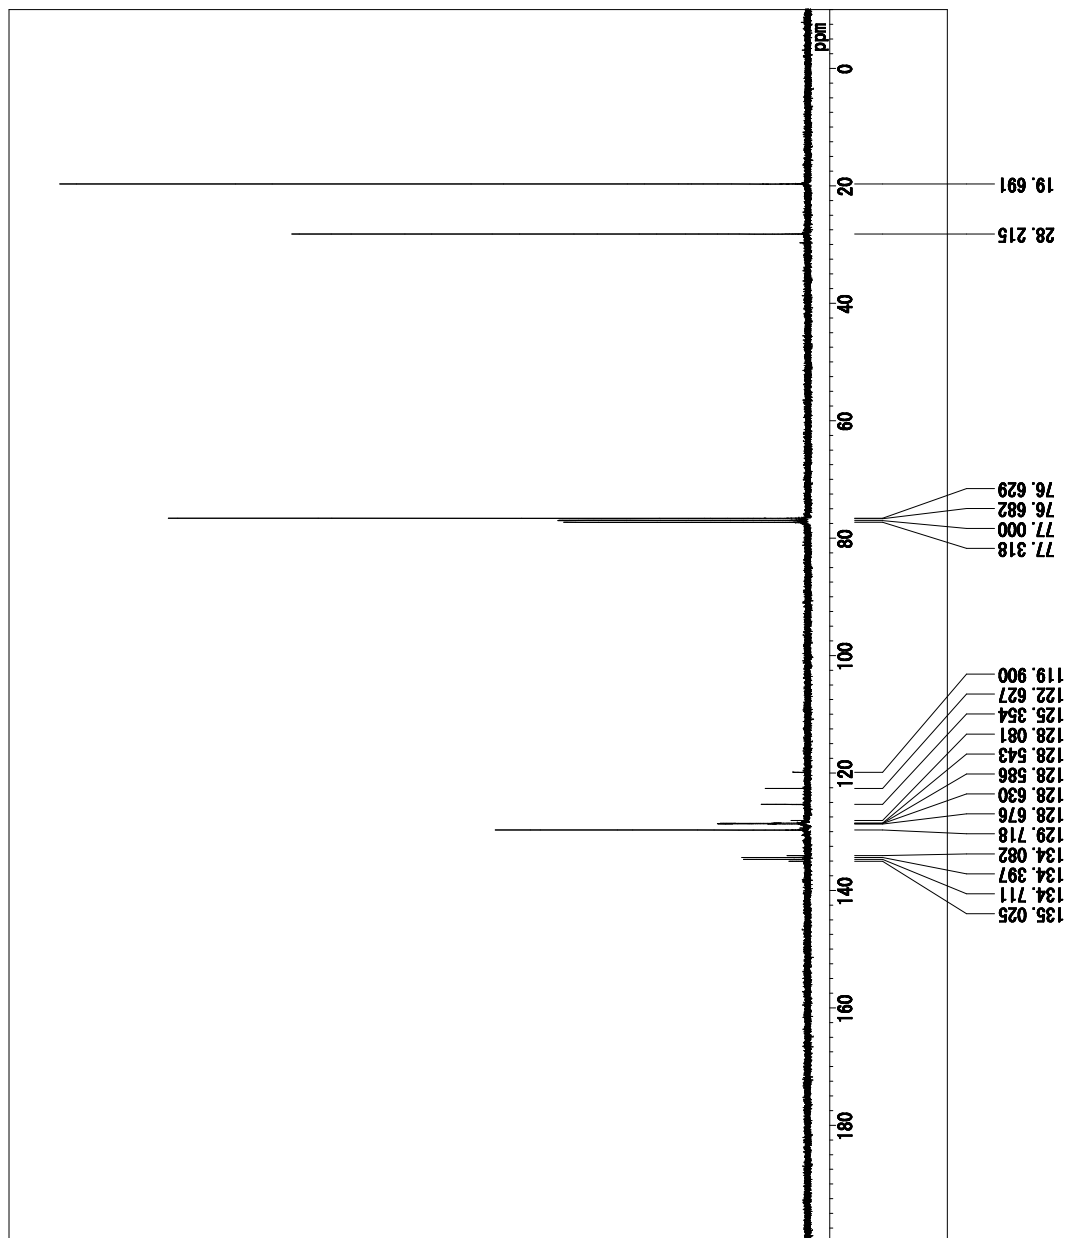

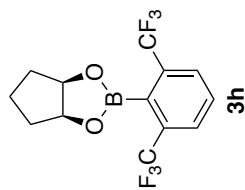

Comment HRS01-34\_pure\_20160905\_01  
 Date 2016/Sep/05  
 ObsNuc <sup>1</sup>H  
 ExMode PROTON\_001  
 ObsFreq 399.45 MHz  
 Scan 8  
 AcqTime 2.569 s  
 Acc. Interval 5.569 s  
 Spinning 16.0 Hz  
 Temperature 25.0 °C  
 Solvent cdcl<sub>3</sub>

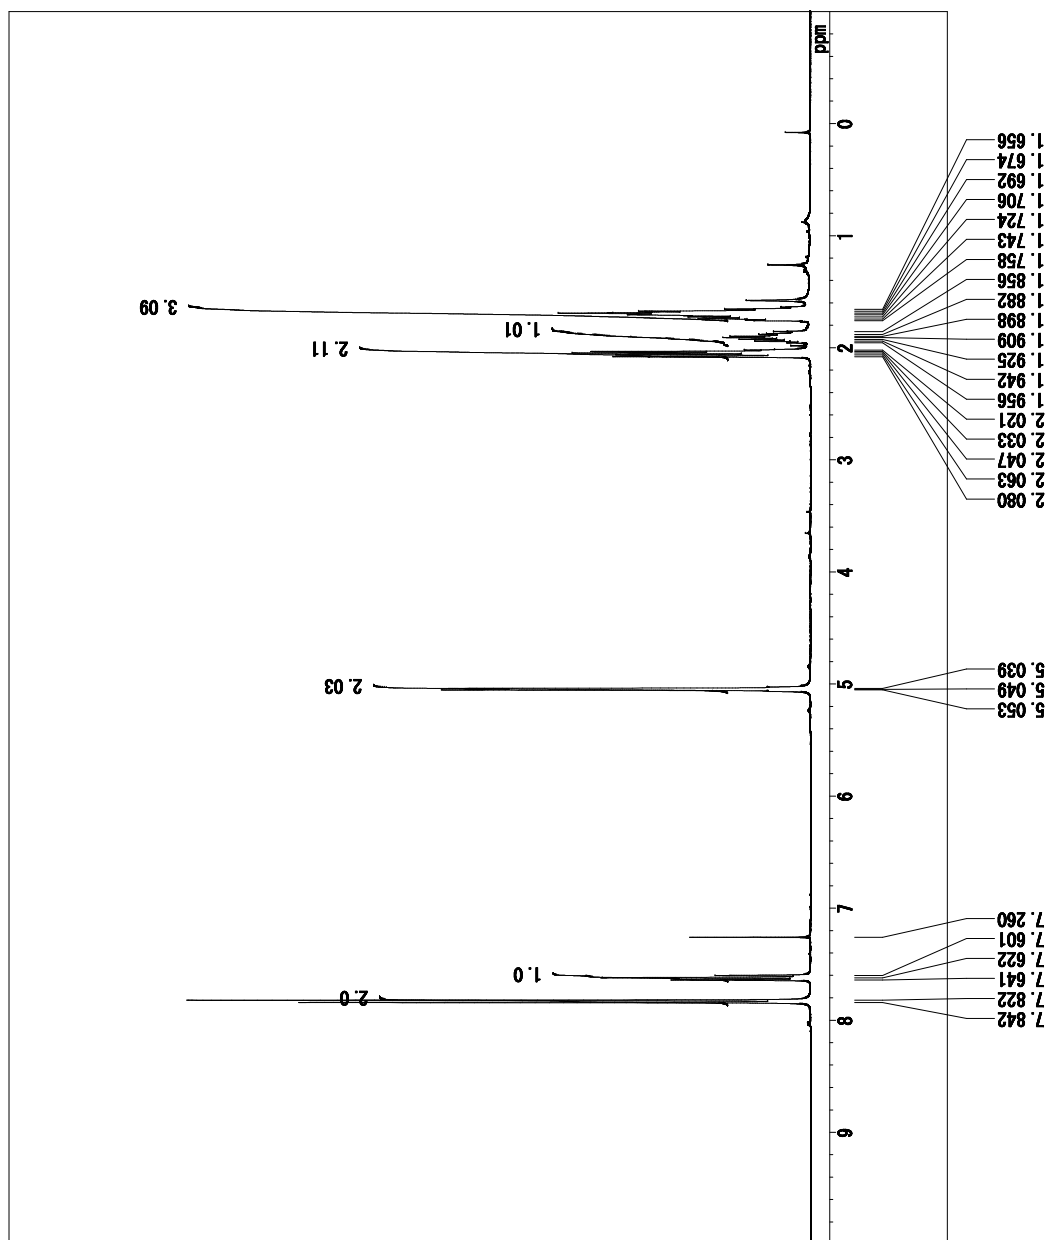



Comment HRS01-34\_pure\_20160905\_02  
 Date 2016/Sep/05  
 ObsNuc <sup>13</sup>C  
 ExMode CARBON\_001  
 ObsFreq 100.45 MHz  
 Scan 512  
 AcqTime 1.3631 s  
 Acc. Interval 3.3631 s  
 Spinning 20.0 Hz  
 Temperature 25.0 °C  
 Solvent cdcl<sub>3</sub>

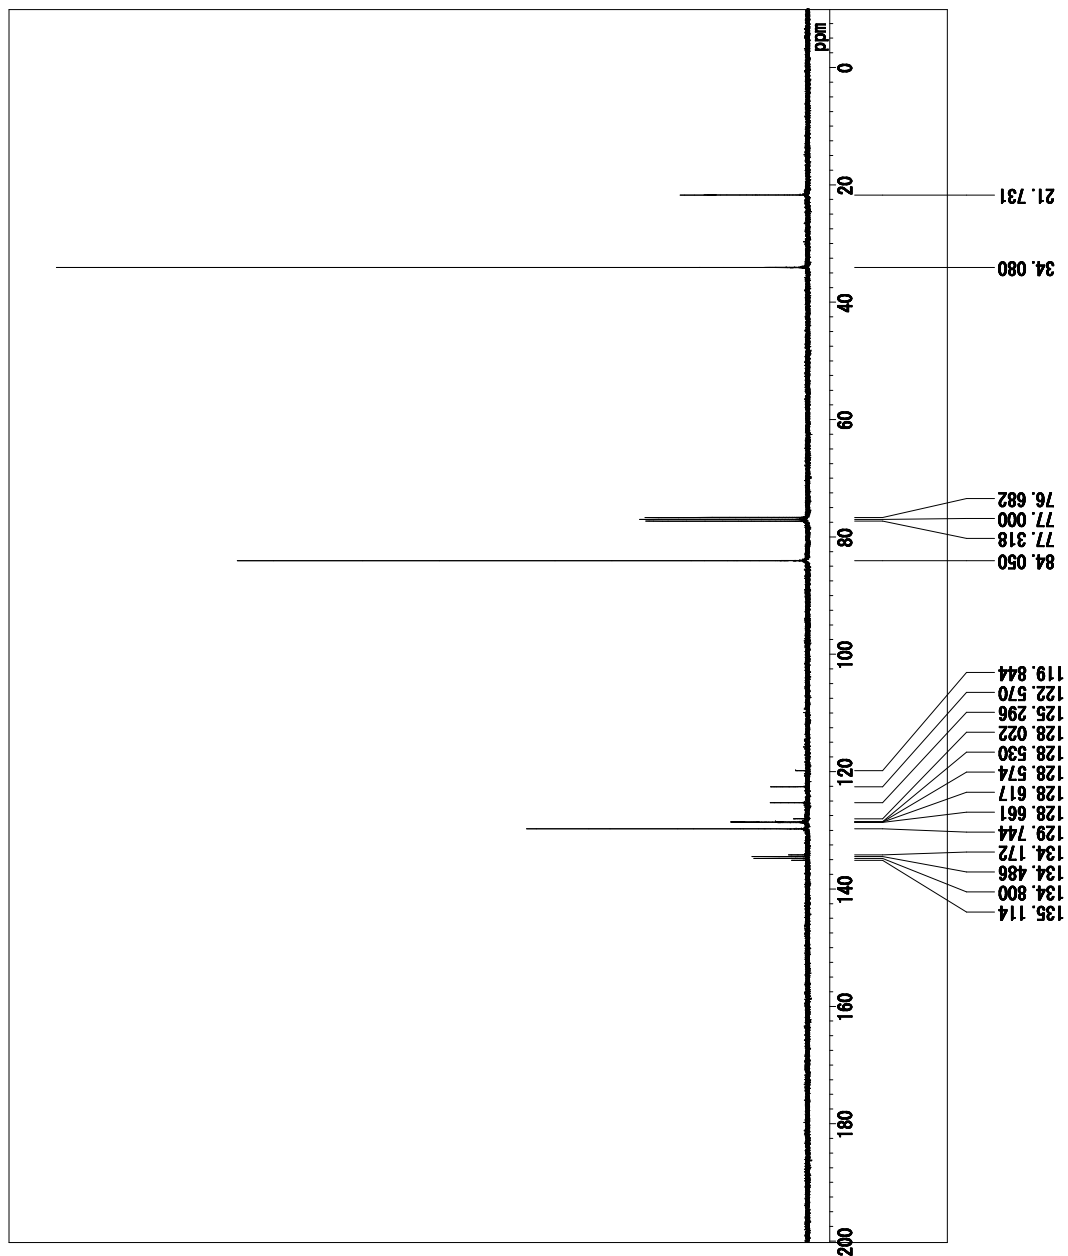

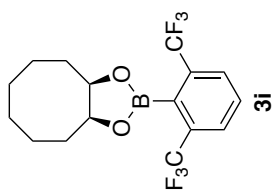

Comment HRS01-36\_pure2\_20160824\_01  
 Date 2016/Aug/24  
 ObsNuc <sup>1</sup>H  
 ExMode PROTON\_001  
 ObsFreq 400.28 MHz  
 Scan 8  
 AcqTime 2.5559 s  
 Acc. Interval 5.5559 s  
 Spinning 16.0 Hz  
 Temperature 30.0 °C  
 Solvent cdcl<sub>3</sub>

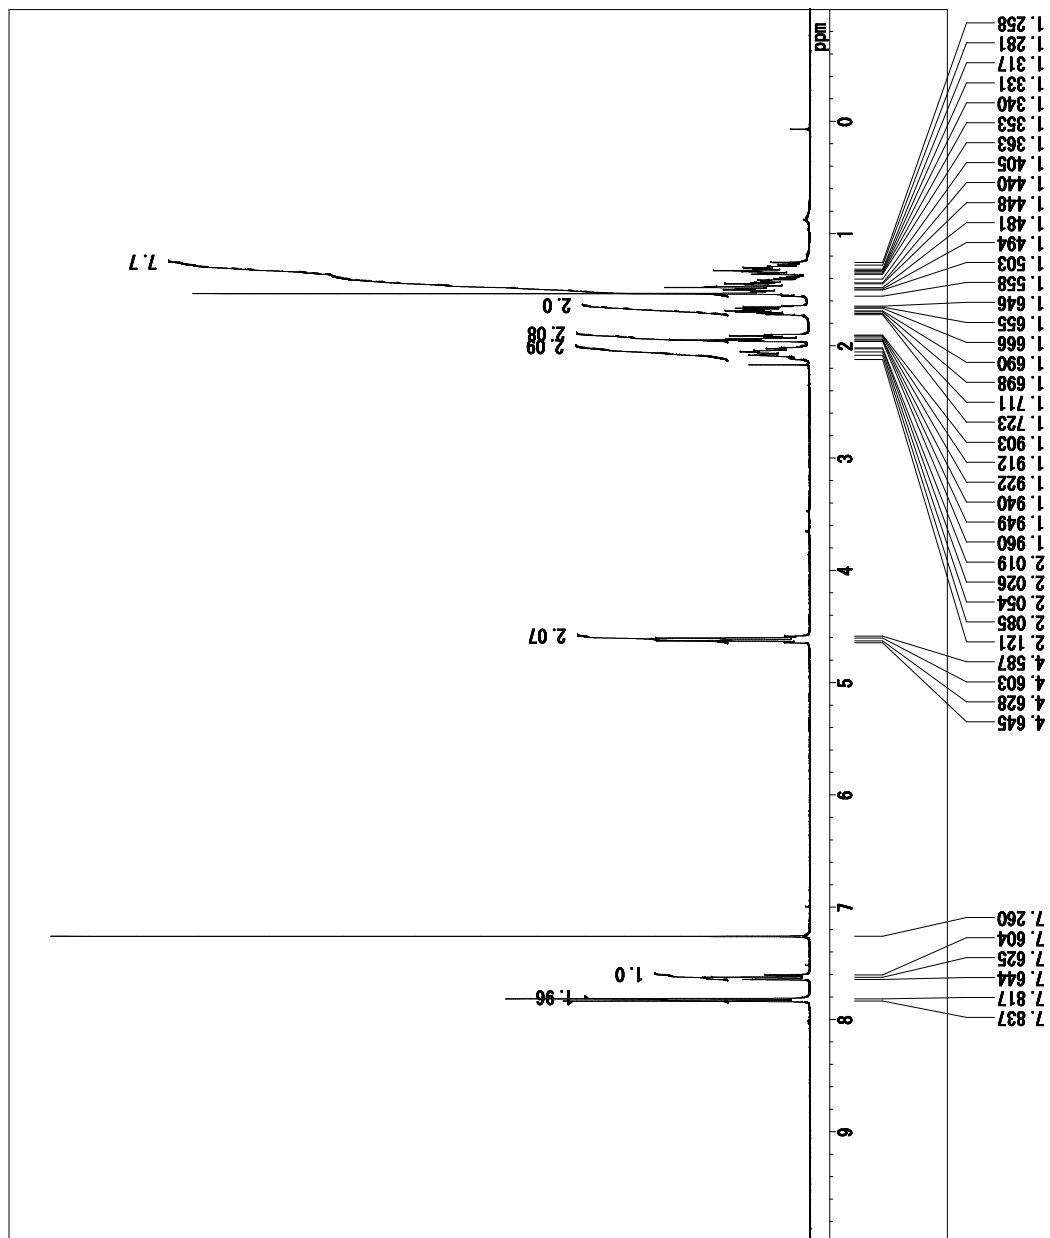



Comment HRS01-36\_pure\_C\_20160824\_0  
 1  
 Date 2016/Aug/24  
 ObsNuc <sup>13</sup>C  
 ExMCode CARBON\_001  
 ObsFreq 100.45 MHz  
 Scan 512  
 AcqTime 1.3631 s  
 Acc. Interval 3.3631 s  
 Spinning 20.0 Hz  
 Temperature 25.0 °C  
 Solvent cdcl<sub>3</sub>

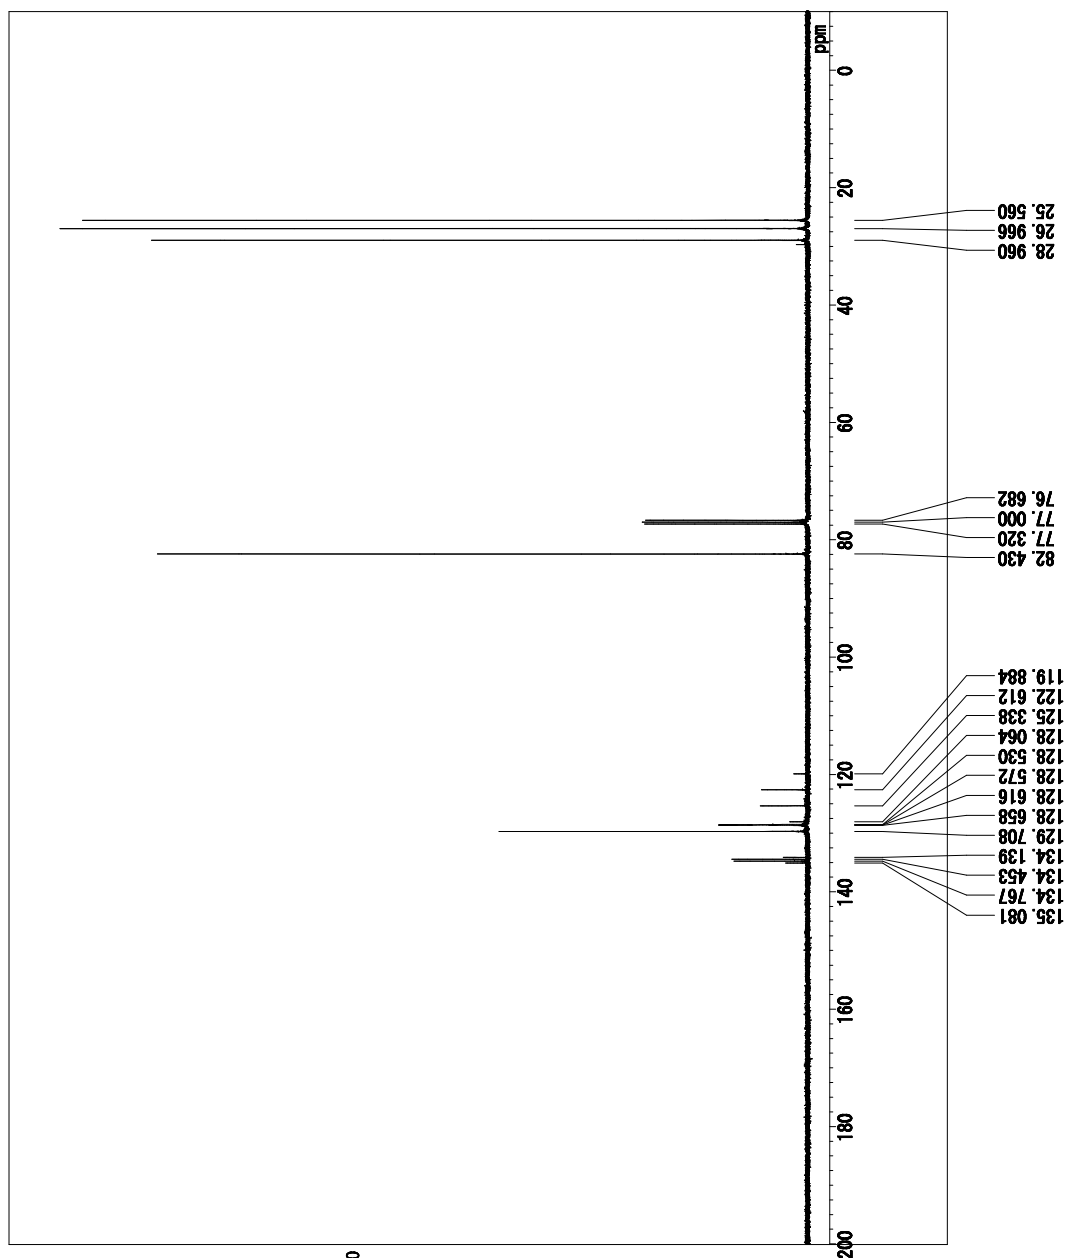

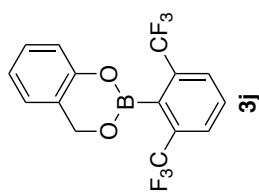

Comment HRS02-24\_pure\_20160916\_01  
 Date 2016/Sep/16  
 ObsNuc <sup>1</sup>H  
 ExMode PROTON\_001  
 ObsFreq 400.28 MHz  
 Scan 8  
 AcqTime 2.5559 s  
 Acc. Interval 5.5559 s  
 Spinning 16.0 Hz  
 Temperature 30.0 °C  
 Solvent cdcl<sub>3</sub>

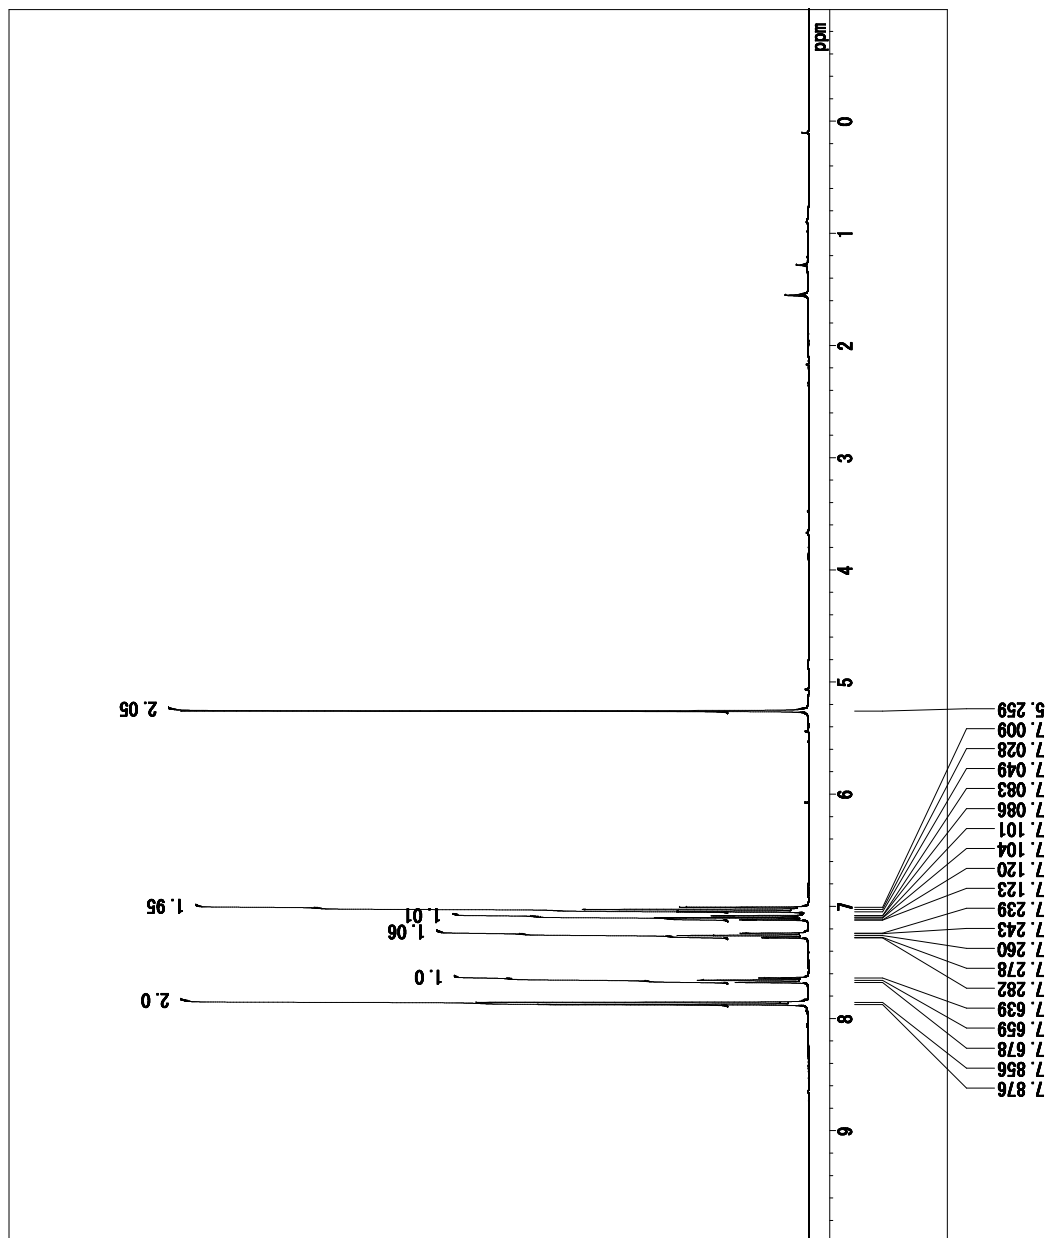



Comment HRS02-24\_C\_20160920\_01  
 Date 2016/Sep/20  
 ObsNuc <sup>13</sup>C  
 ExMode CARBON\_001  
 ObsFreq 100.45 MHz  
 Scan 512  
 AcqTime 1.3631 s  
 Acc. Interval 3.3631 s  
 Spinning 20.0 Hz  
 Temperature 25.0 °C  
 Solvent cdc13

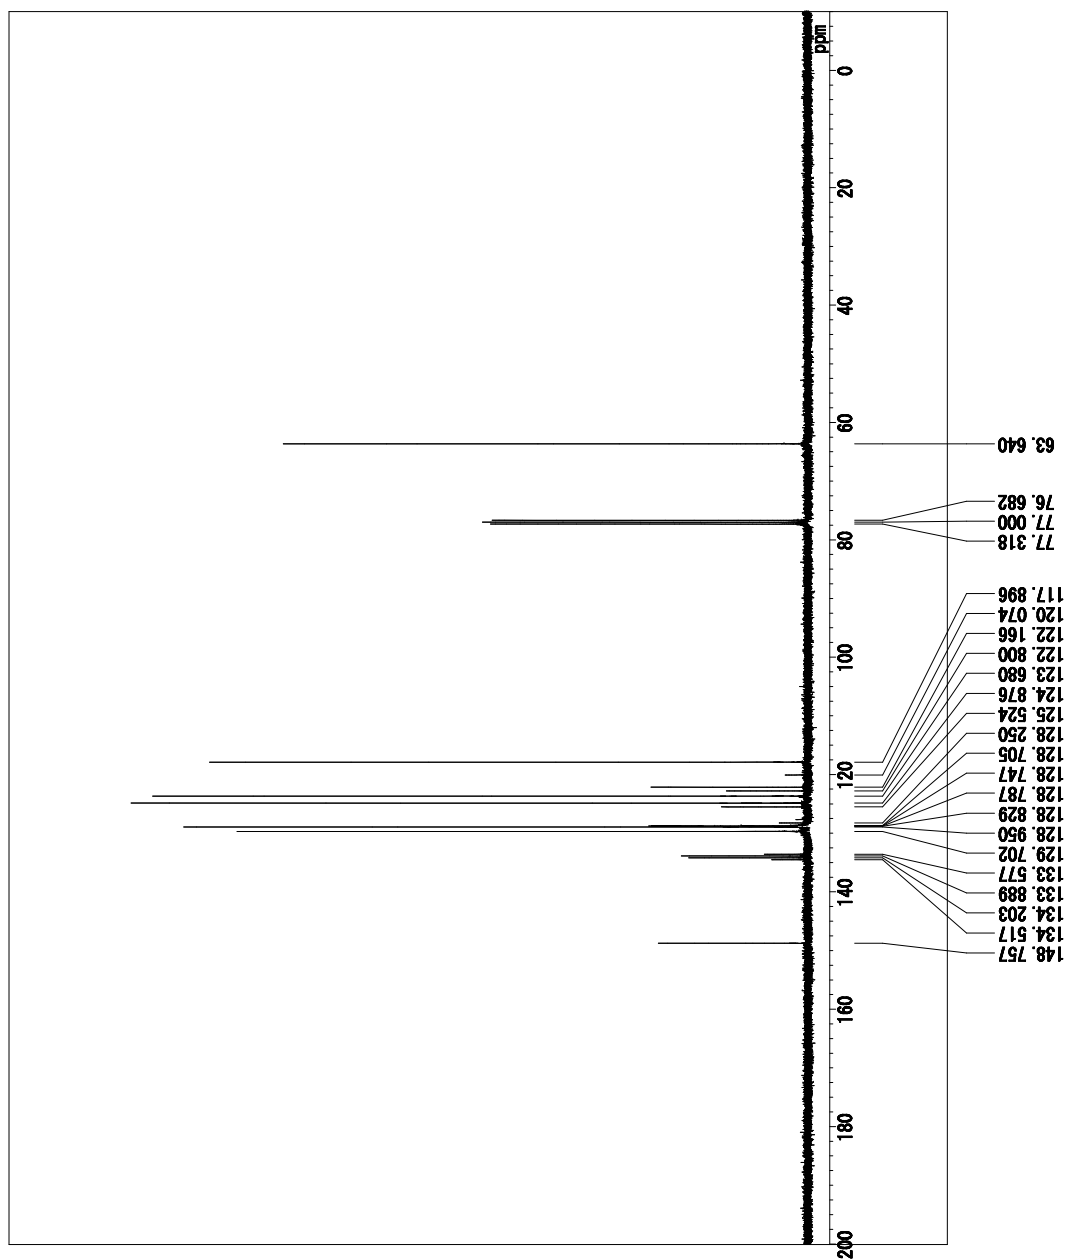

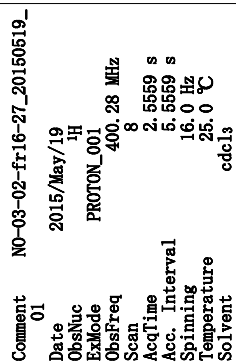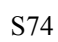



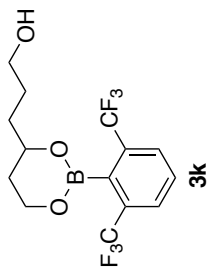

Comment NO-03-02-C-20150519\_01  
 Date 2015/May/19  
 ObsNuc <sup>13</sup>C  
 ExMode CARBON\_001  
 ObsFreq 100.66 MHz  
 Scan 512  
 AcqTime 1.3631 s  
 Acc. Interval 3.3631 s  
 Spinning 20.0 Hz  
 Temperature 25.0 °C  
 Solvent cdc13

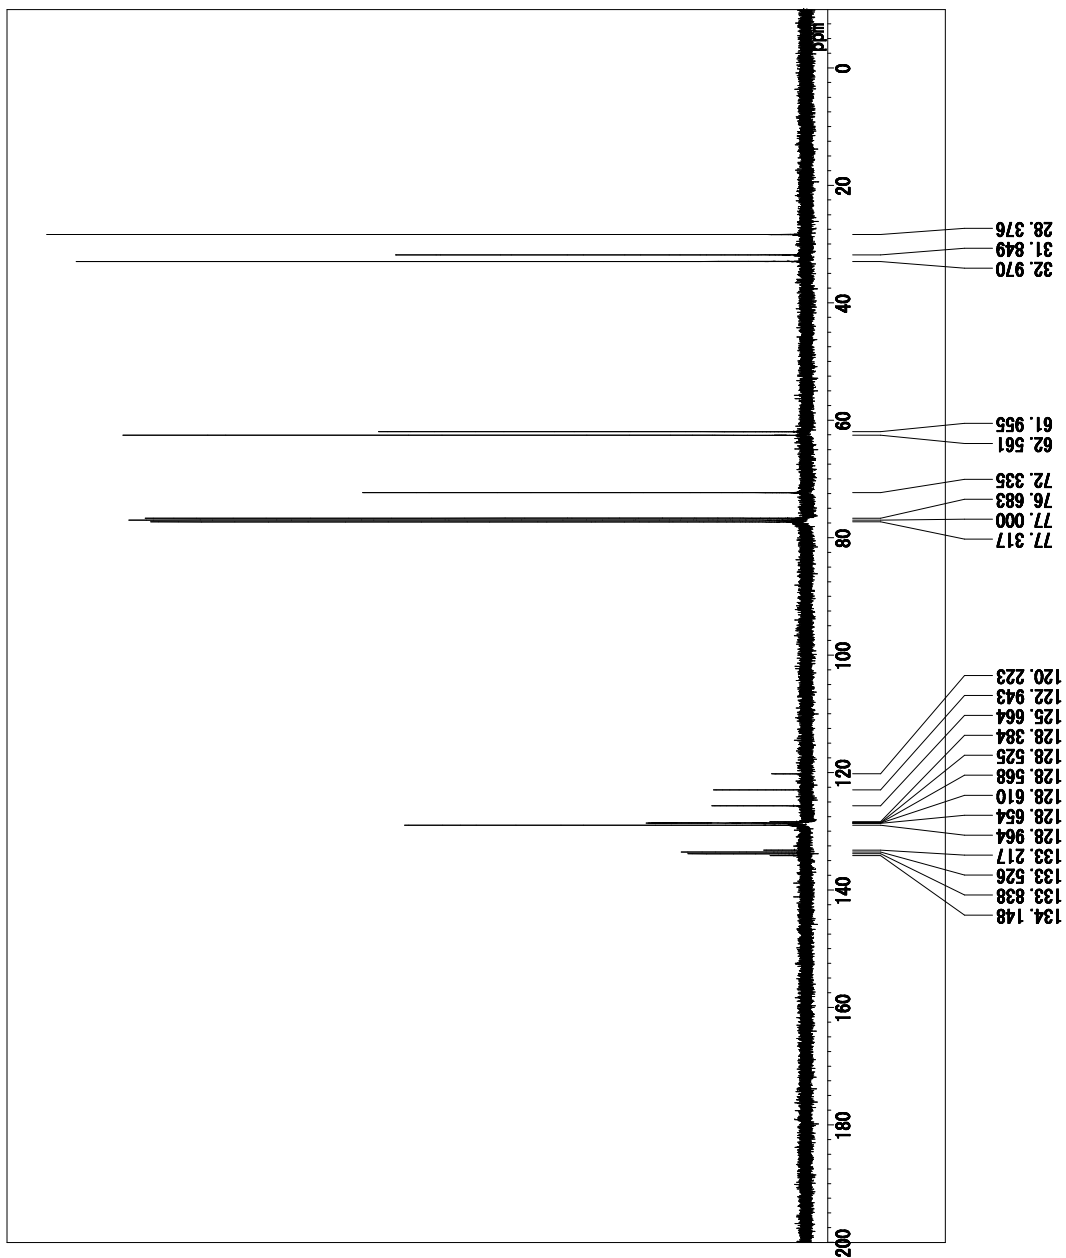

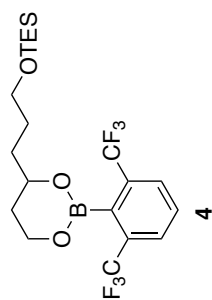

Comment su-TES\_20160816\_01  
 Date 2016/Aug/16  
 ObsNuc <sup>1</sup>H  
 ExMode PROTON\_001  
 ObsFreq 399.45 MHz  
 Scan 8  
 AcqTime 2.569 s  
 Acc. Interval 5.569 s  
 Spinning 16.0 Hz  
 Temperature 25.0 °C  
 Solvent cdcl<sub>3</sub>

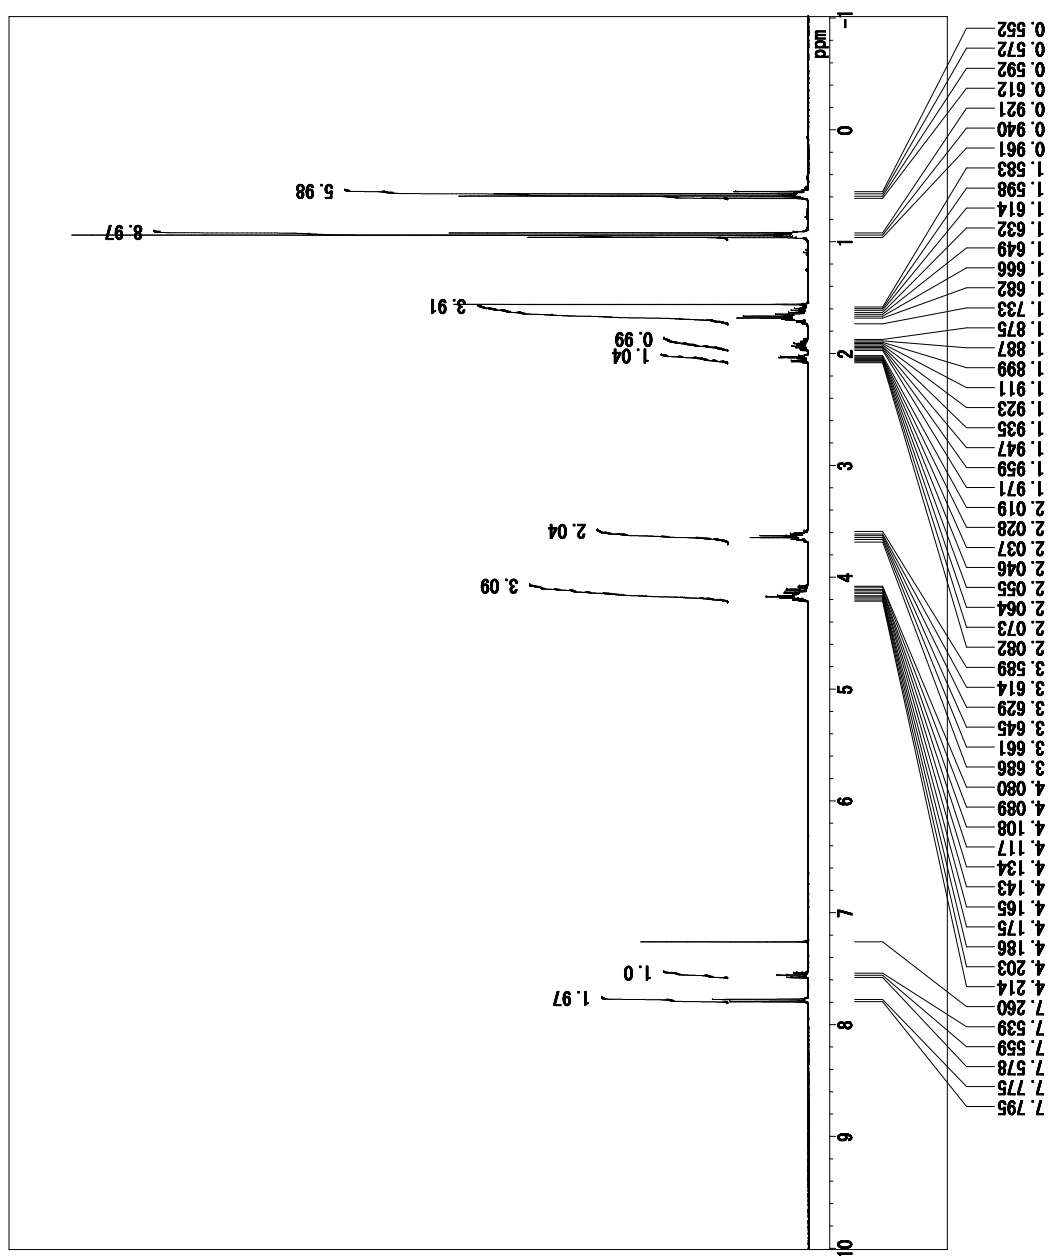

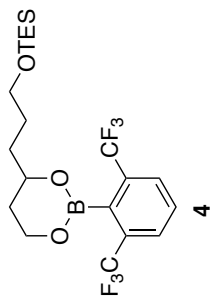

Comment su-TES-13C\_20160816\_02  
 Date 2016/Aug/16  
 ObsNuc <sup>13</sup>C  
 ExMode CARBON\_001  
 ObsFreq 100.45 MHz  
 Scan 512  
 AcqTime 1.3631 s  
 Acc. Interval 3.3631 s  
 Spinning 20.0 Hz  
 Temperature 25.0 °C  
 Solvent cdc13

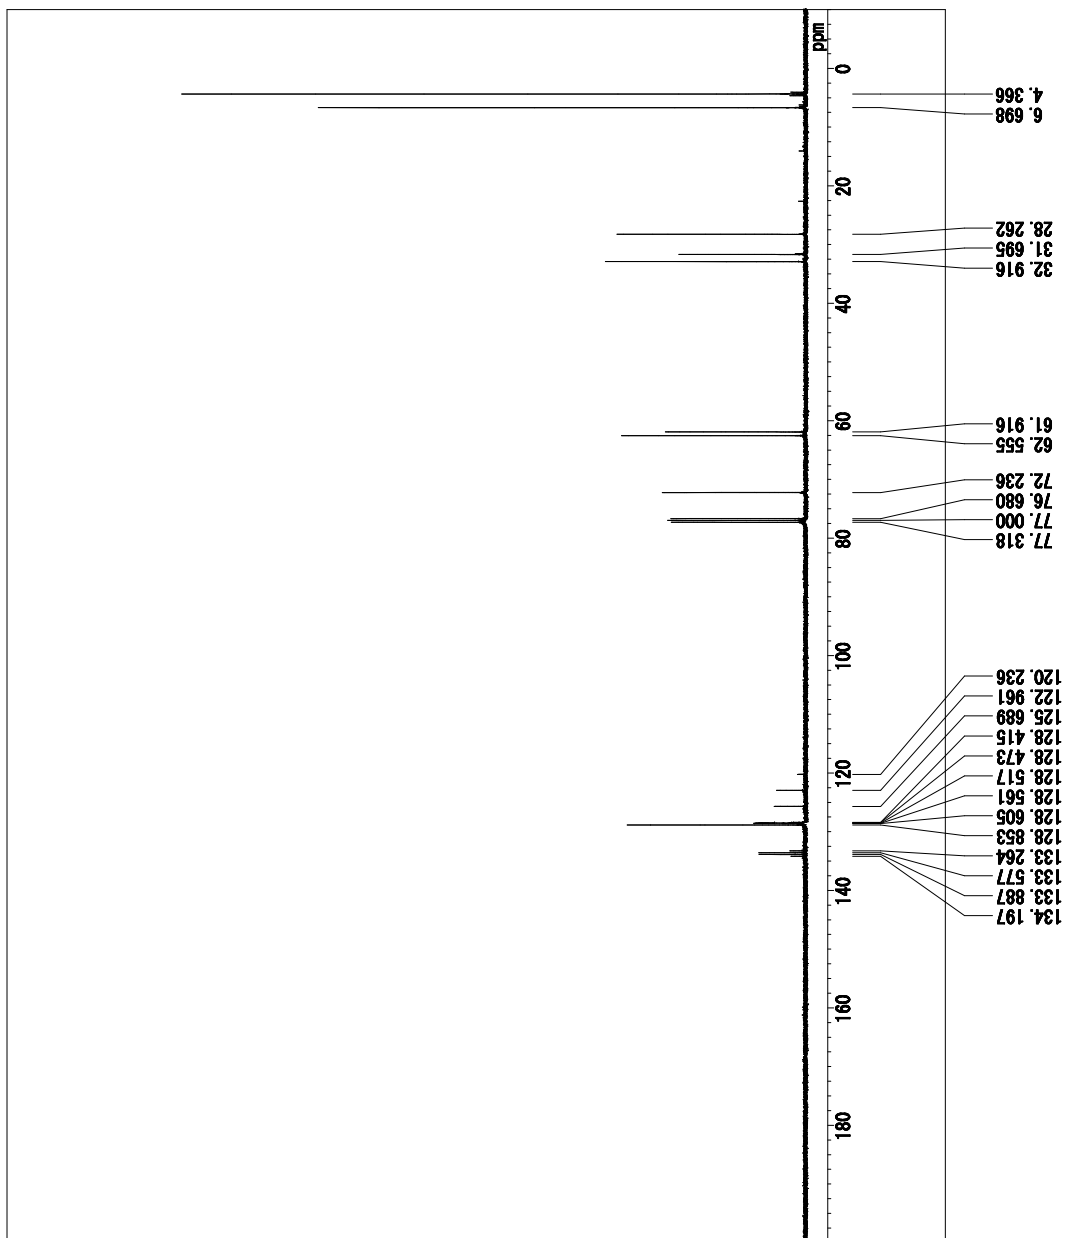

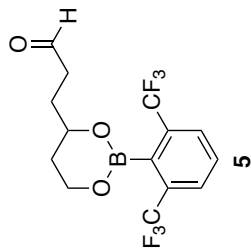

Comment hrs01-01pure\_20160407\_01  
 Date 2016/Apr/07  
 ObsNuc <sup>1</sup>H  
 ExMode PROTON\_001  
 ObsFreq 399.45 MHz  
 Scan 8  
 AcqTime 2.569 s  
 Acc. Interval 5.569 s  
 Spinning 16.0 Hz  
 Temperature 25.0 °C  
 Solvent cdcl<sub>3</sub>

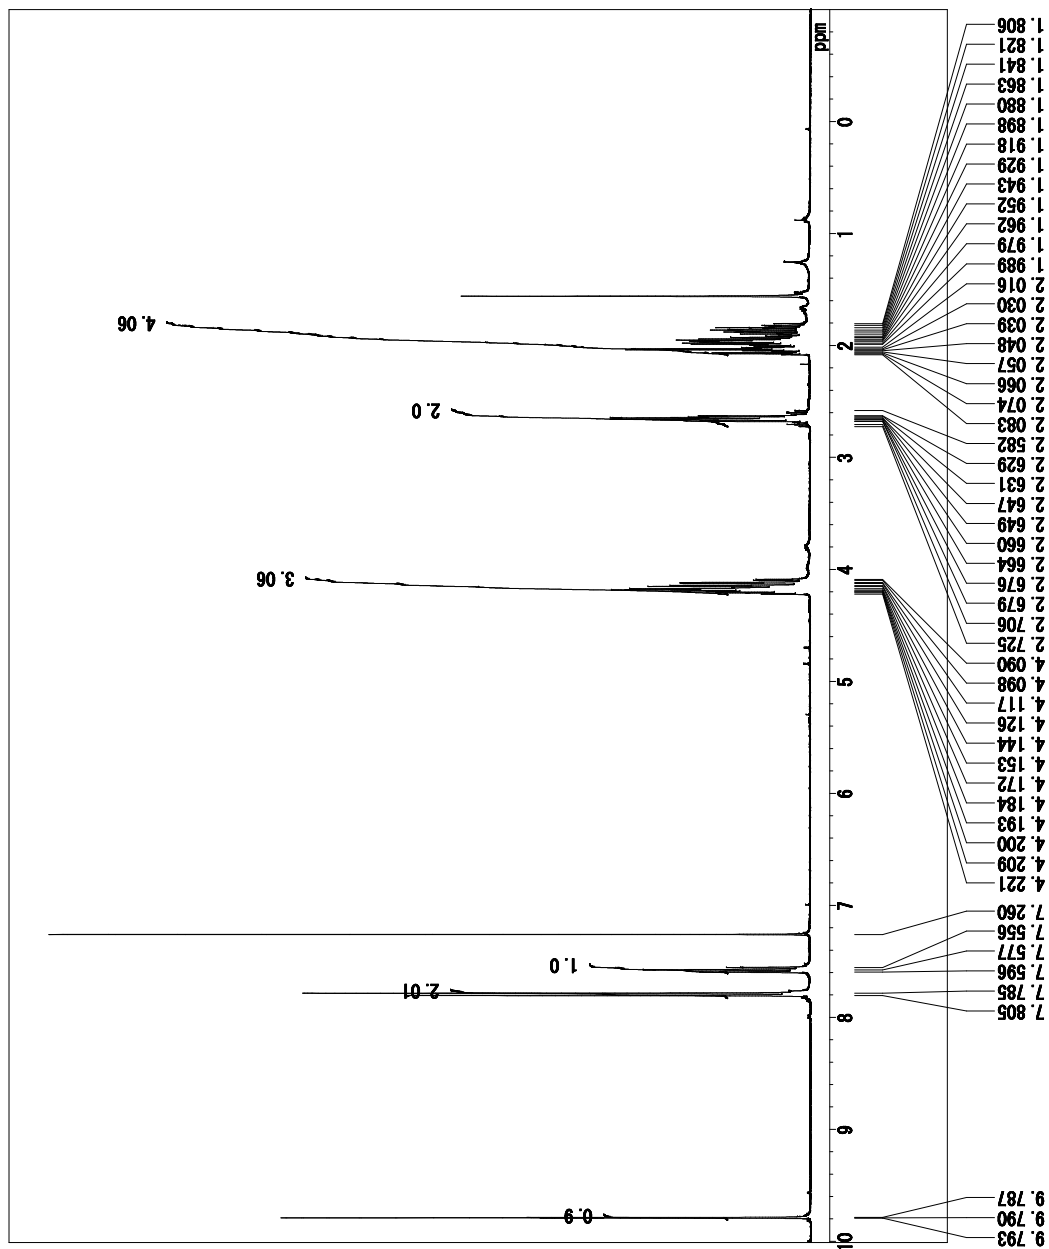

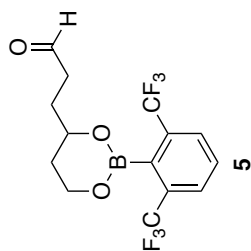

Comment NO-03-03-C\_20150522\_01  
 Date 2015/May/22  
 ObsNuc <sup>13</sup>C  
 ExMode CARBON\_001  
 ObsFreq 100.45 MHz  
 Scan 512  
 AcqTime 1.3631 s  
 Acc. Interval 3.3631 s  
 Spinning 20.0 Hz  
 Temperature 3.0 °C  
 Solvent cdcl<sub>3</sub>

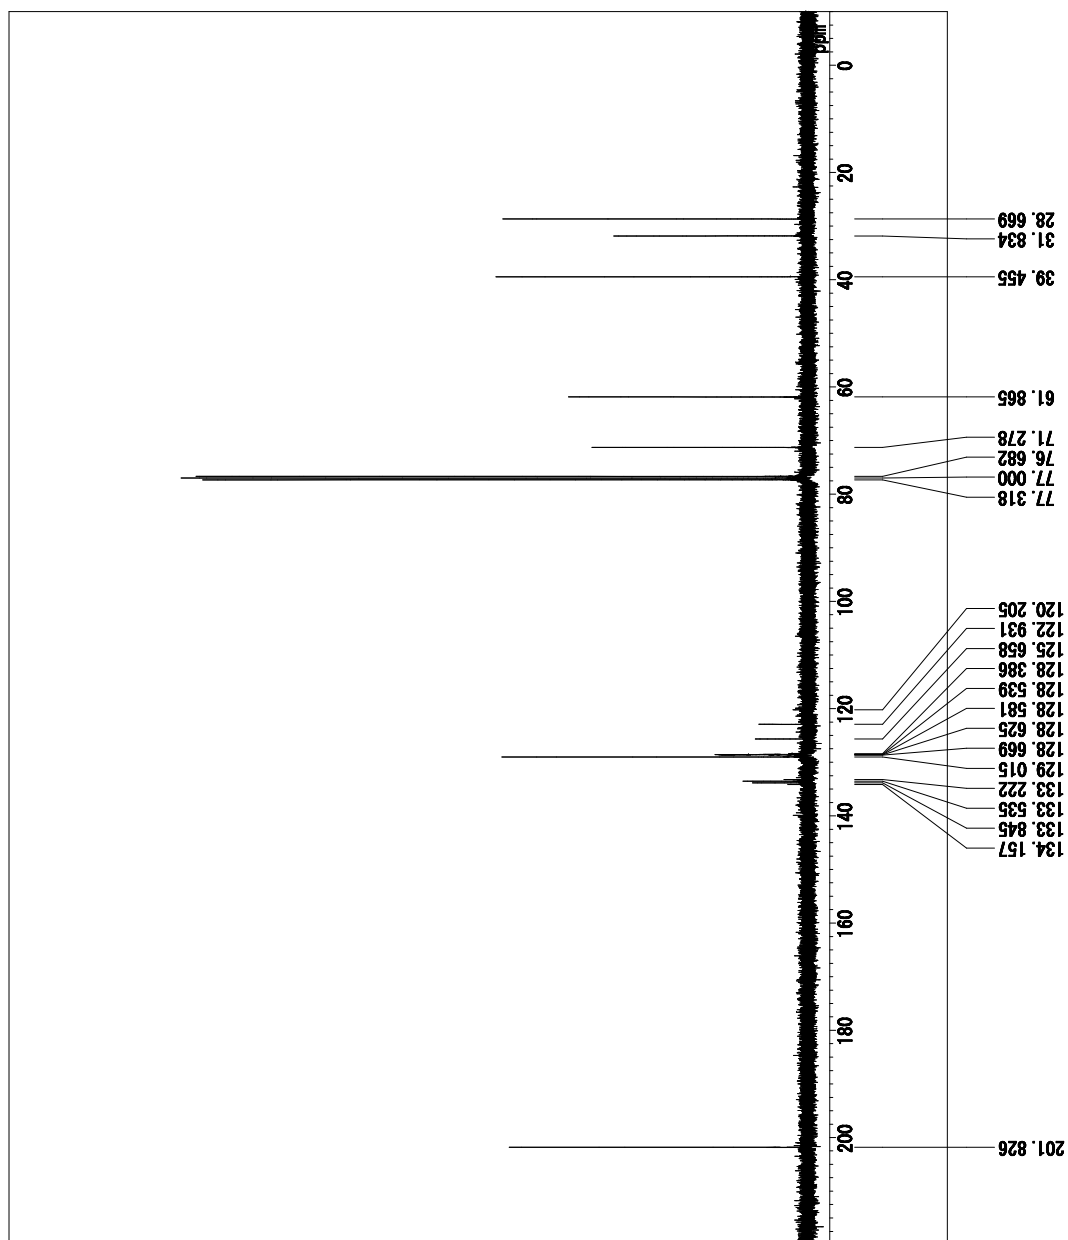

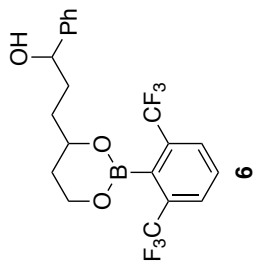

Comment sul3007pure\_20160805\_01  
 Date 2016/Aug/05  
 ObsNuc <sup>1</sup>H  
 ExMode PROTON\_001  
 ObsFreq 400.28 MHz  
 Scan 8  
 AcqTime 2.5559 s  
 Acc. Interval 5.5559 s  
 Spinning 16.0 Hz  
 Temperature 25.0 °C  
 Solvent cdcl<sub>3</sub>

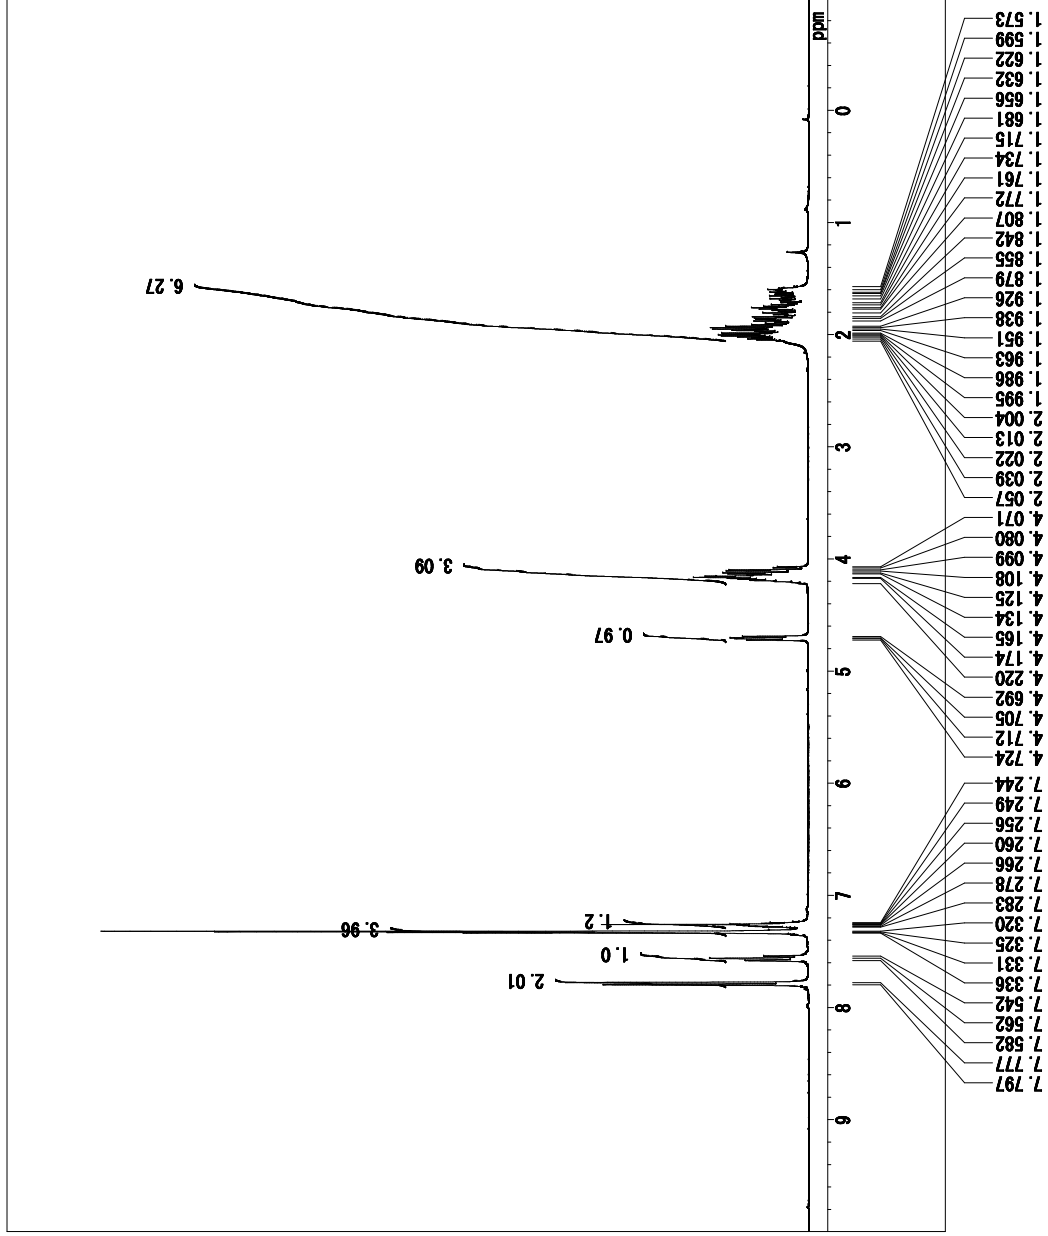

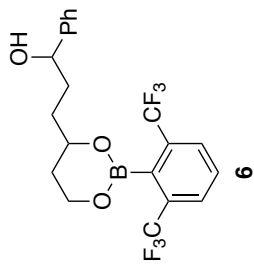

Comment sul3007pure\_20160805\_01  
 Date 2016/Aug/05  
 ObsNuc <sup>13</sup>C  
 ExMode CARBON\_001  
 ObsFreq 100.66 MHz  
 Scan 512  
 AcqTime 1.3631 s  
 Acc. Interval 3.3631 s  
 Spinning 20.0 Hz  
 Temperature 25.0 °C  
 Solvent cdcl<sub>3</sub>

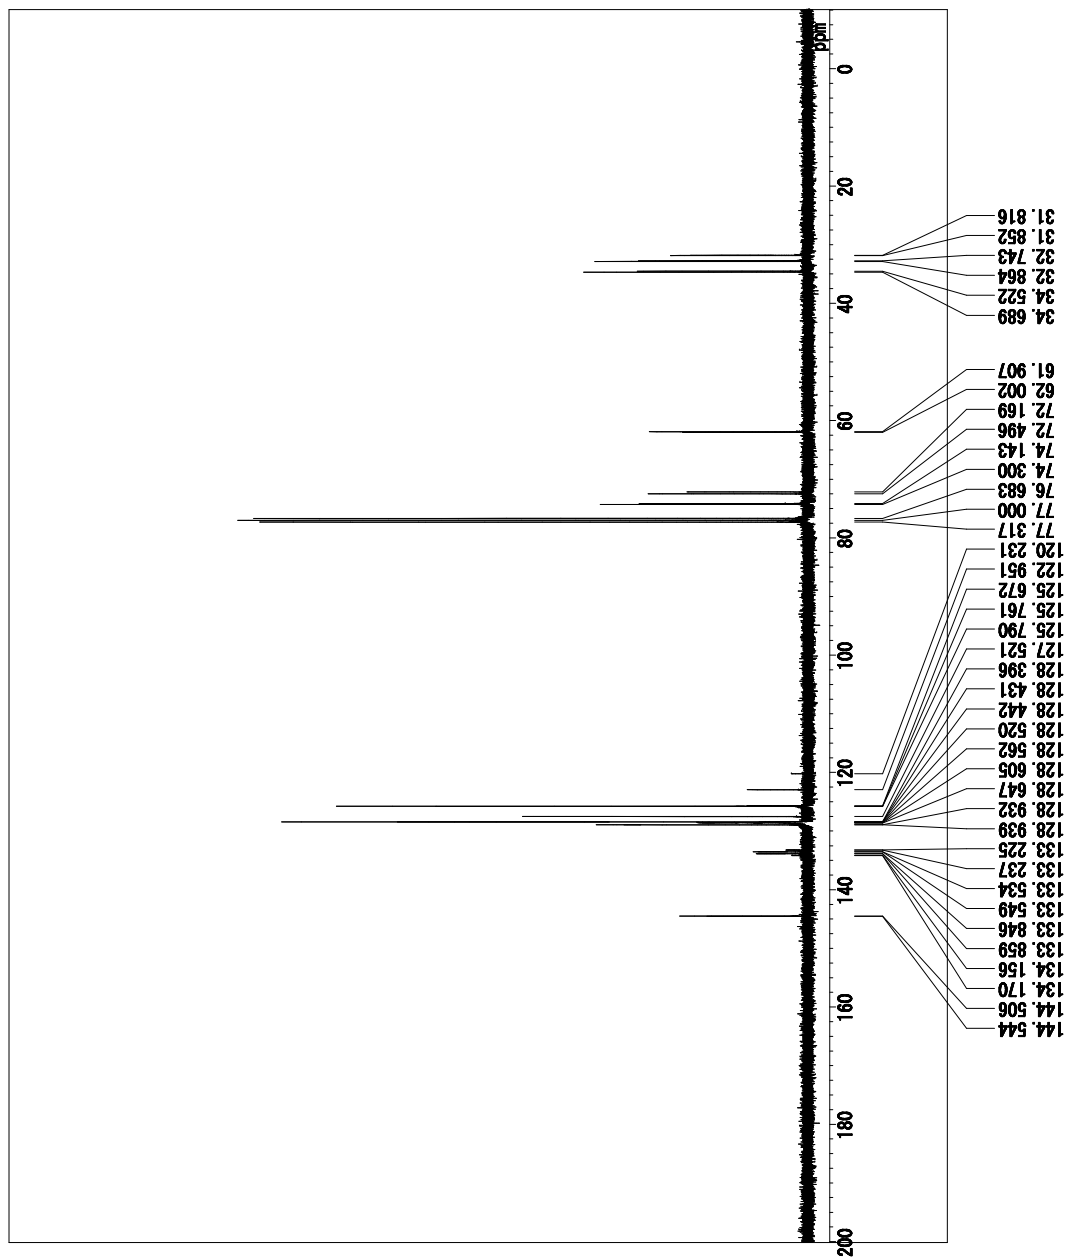

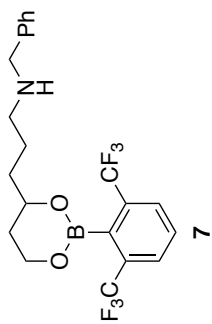

Comment sul5023\_20170825\_01  
 Date 2017/Aug/25  
 ObsNuc <sup>1</sup>H  
 ExMode PROTON\_001  
 ObsFreq 399.45 MHz  
 Scan 8  
 AcqTime 2.569 s  
 Acc. Interval 5.569 s  
 Spinning 16.0 Hz  
 Temperature 25.0 °C  
 Solvent cdcl<sub>3</sub>

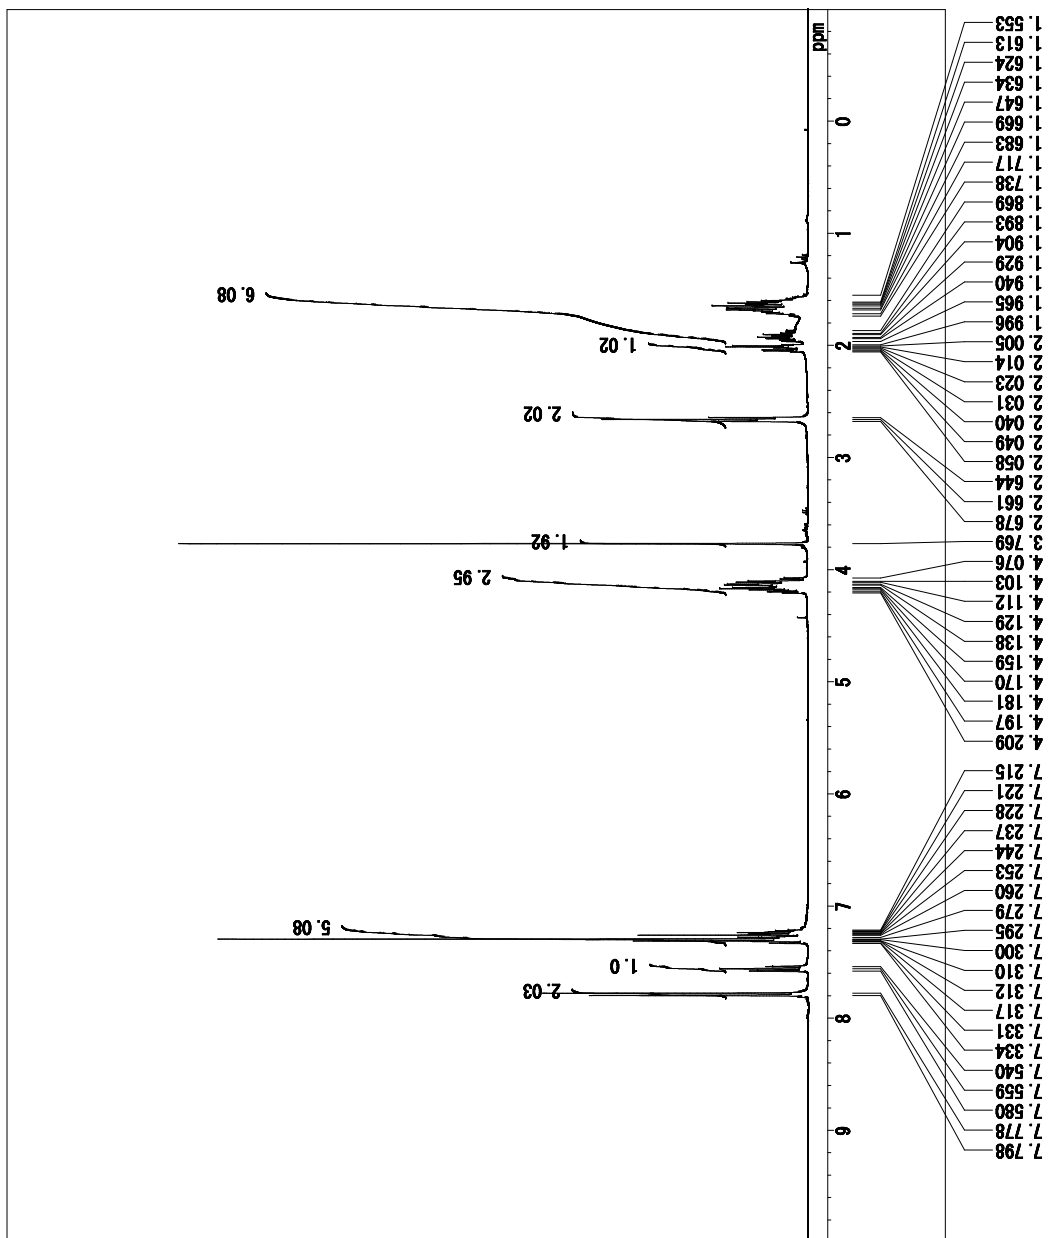



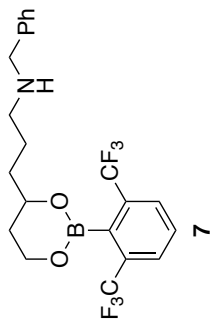

Comment sul5023\_20170825\_01  
 Date 2017/Aug/25  
 ObsNuc <sup>13</sup>C  
 ExMode CARBON\_001  
 ObsFreq 100.45 MHz  
 Scan 1024  
 AcqTime 1.3631 s  
 Acc. Interval 3.3631 s  
 Spinning 20.0 Hz  
 Temperature 25.0 °C  
 Solvent cdc13

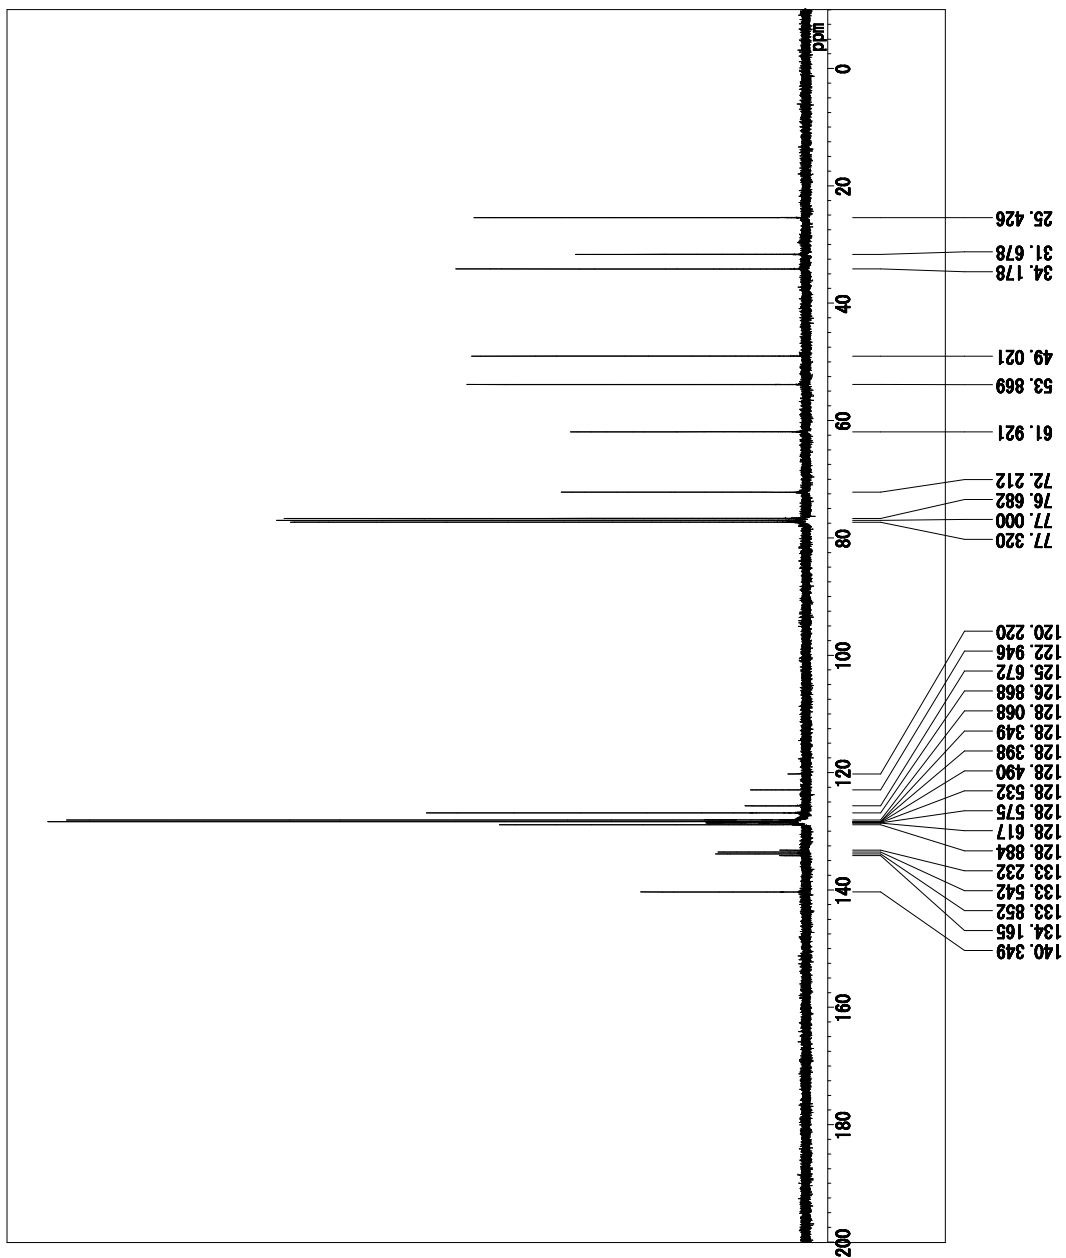

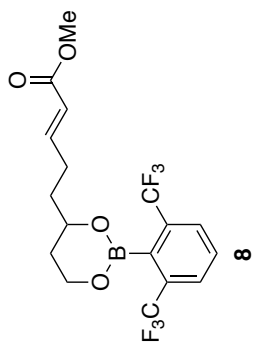

Comment NO-03-20pure\_20150713\_01  
 Date 2015/Jul/13  
 ObsNuc <sup>1</sup>H  
 ExMode PROTON\_001  
 ObsFreq 399.45 MHz  
 Scan 16  
 AcqTime 2.569 s  
 Acc. Interval 5.569 s  
 Spinning 16.0 Hz  
 Temperature 3.0 °C  
 Solvent cdcl<sub>3</sub>

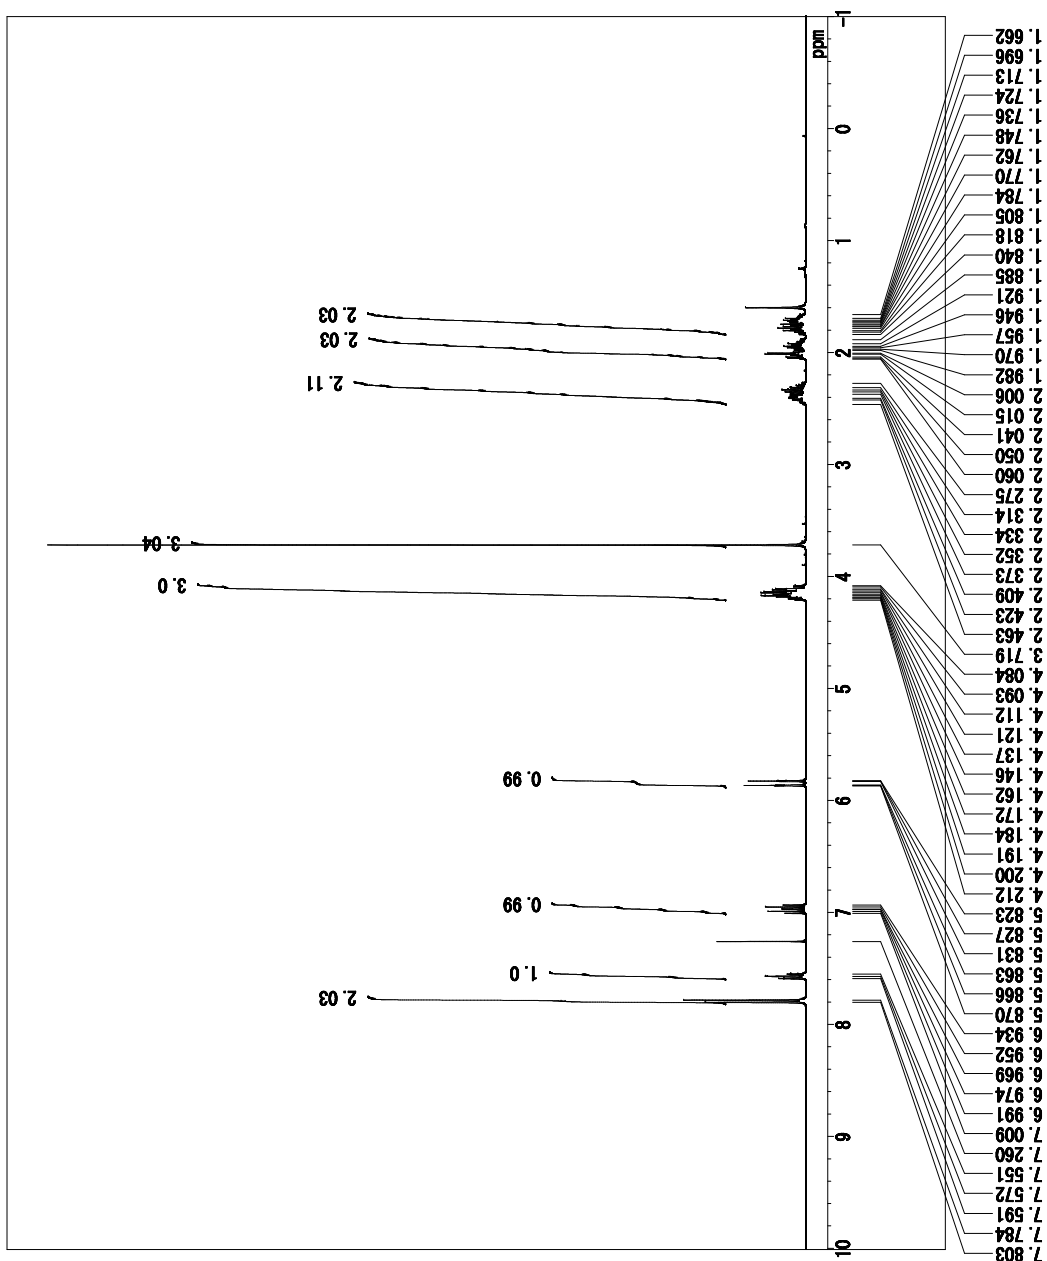

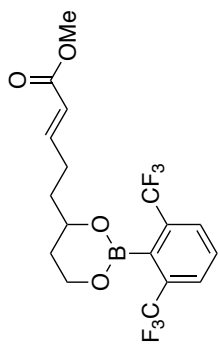

8

Comment NO-03-20-witting-C\_2015071  
 3\_01  
 Date 2015/Jul/13  
 ObsNuc <sup>13</sup>C  
 ExMde CARBON\_001  
 ObsFreq 100.66 MHz  
 Scan 1024  
 AcqTime 1.3631 s  
 Acc. Interval 3.3631 s  
 Spinning 20.0 Hz  
 Temperature 25.0 °C  
 Solvent cdcl<sub>3</sub>

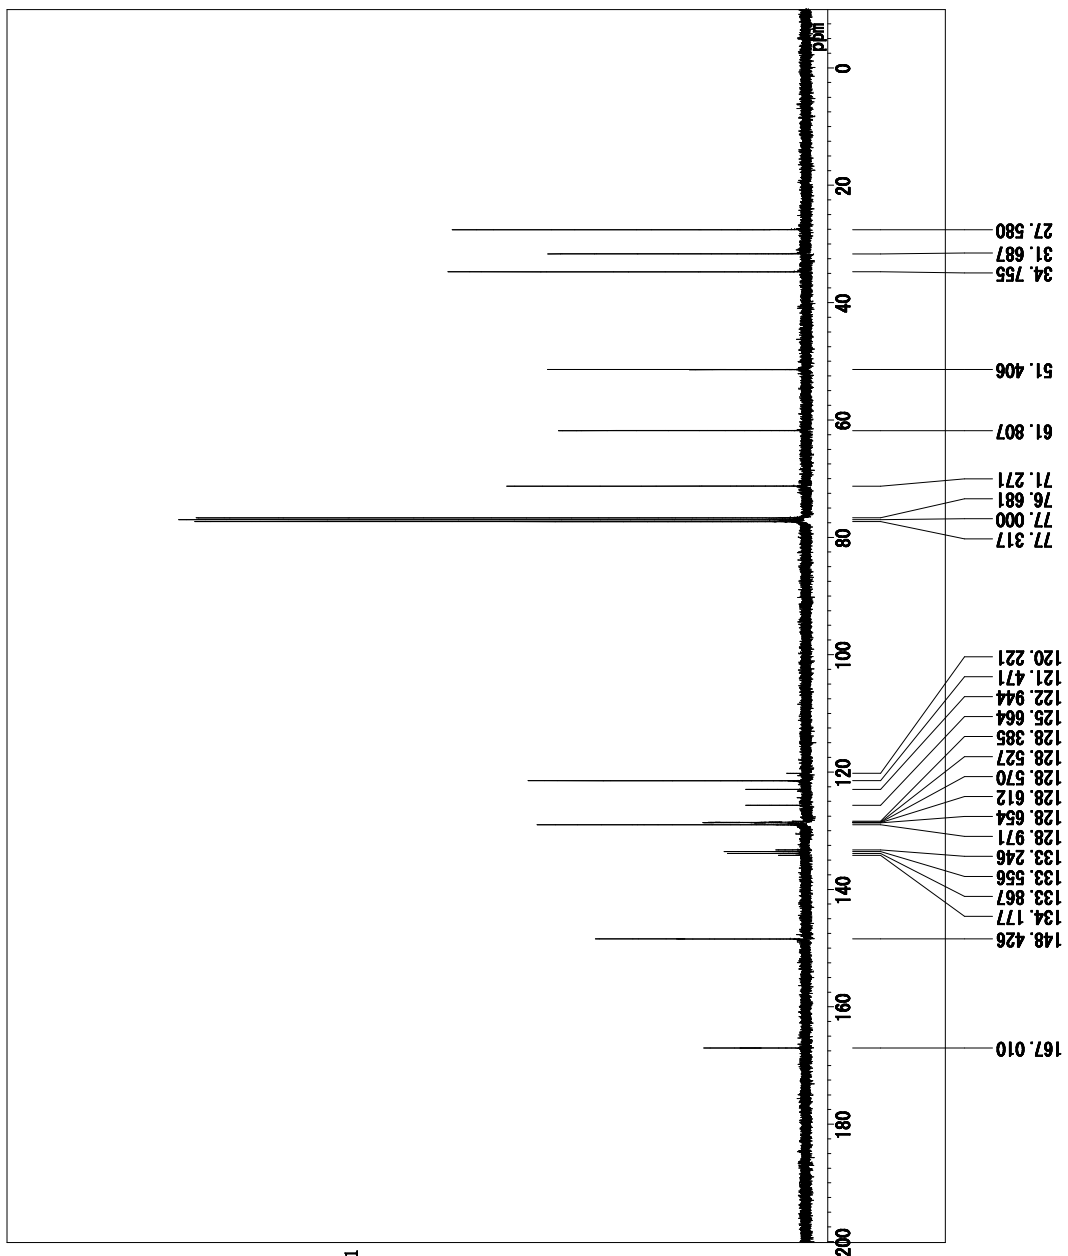

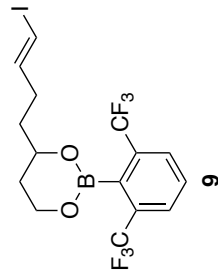

Comment sul15016pure\_20161116\_01  
 Date 2016/Nov/16  
 ObsNuc <sup>1</sup>H  
 ExMode PROTON\_001  
 ObsFreq 400.28 MHz  
 Scan 8  
 AcqTime 2.5559 s  
 Acc. Interval 5.5559 s  
 Spinning 16.0 Hz  
 Temperature 25.0 °C  
 Solvent cdcl<sub>3</sub>

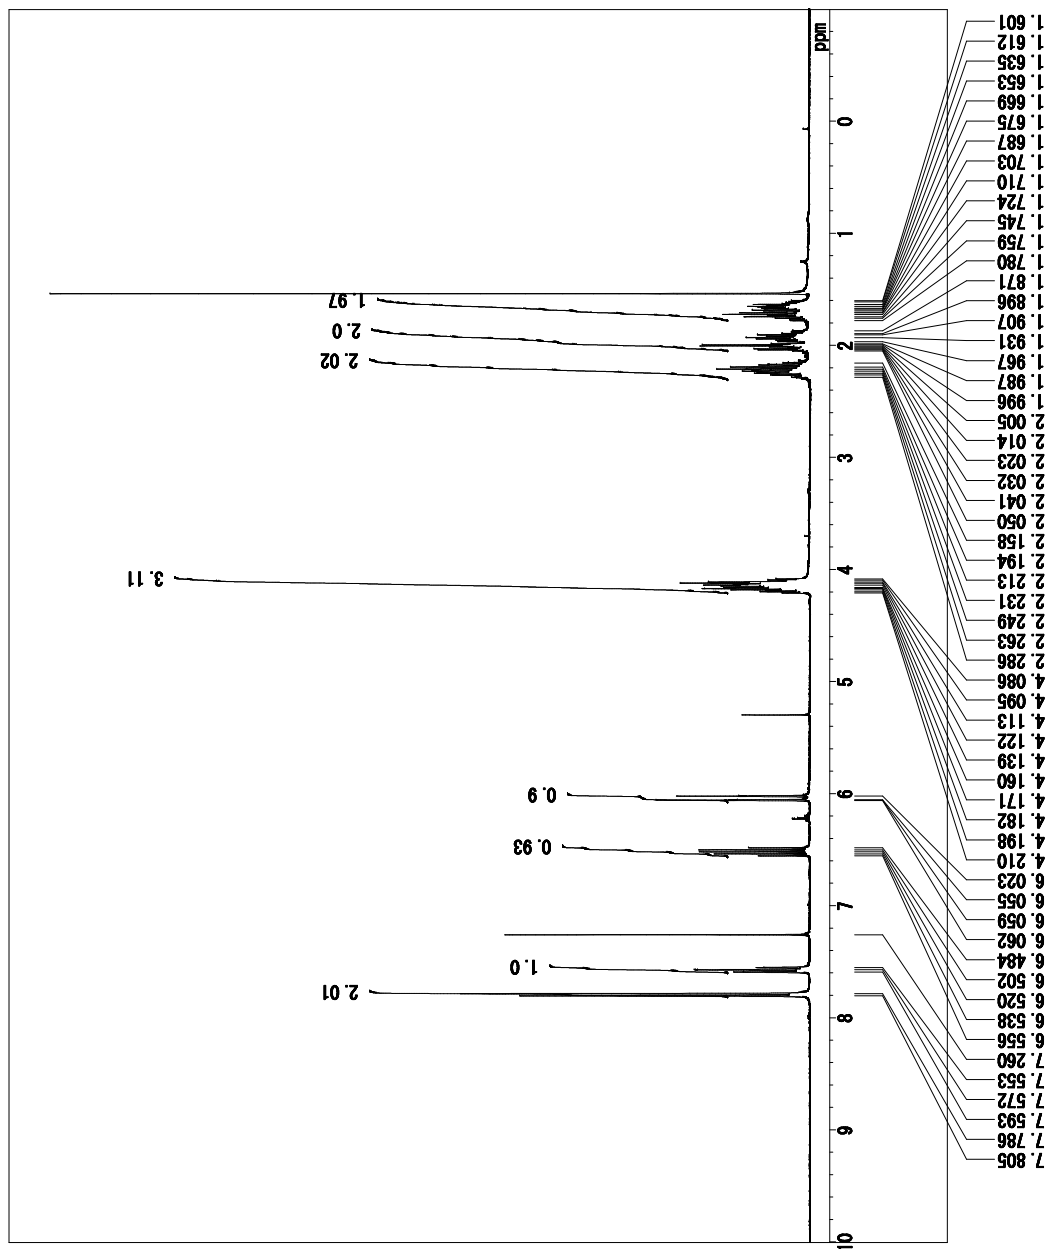

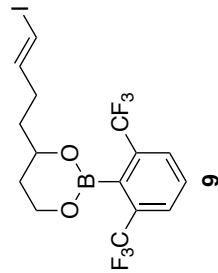

Comment sul5016pure-13C\_20161116\_0  
1  
Date 2016/Nov/16  
ObsNuc <sup>13</sup>C  
ExMde CARBON\_001  
ObsFreq 100.66 MHz  
Scan 512  
AcqTime 1.3631 s  
Acc. Interval 3.3631 s  
Spinning 20.0 Hz  
Temperature 25.0 °C  
Solvent cdcl<sub>3</sub>

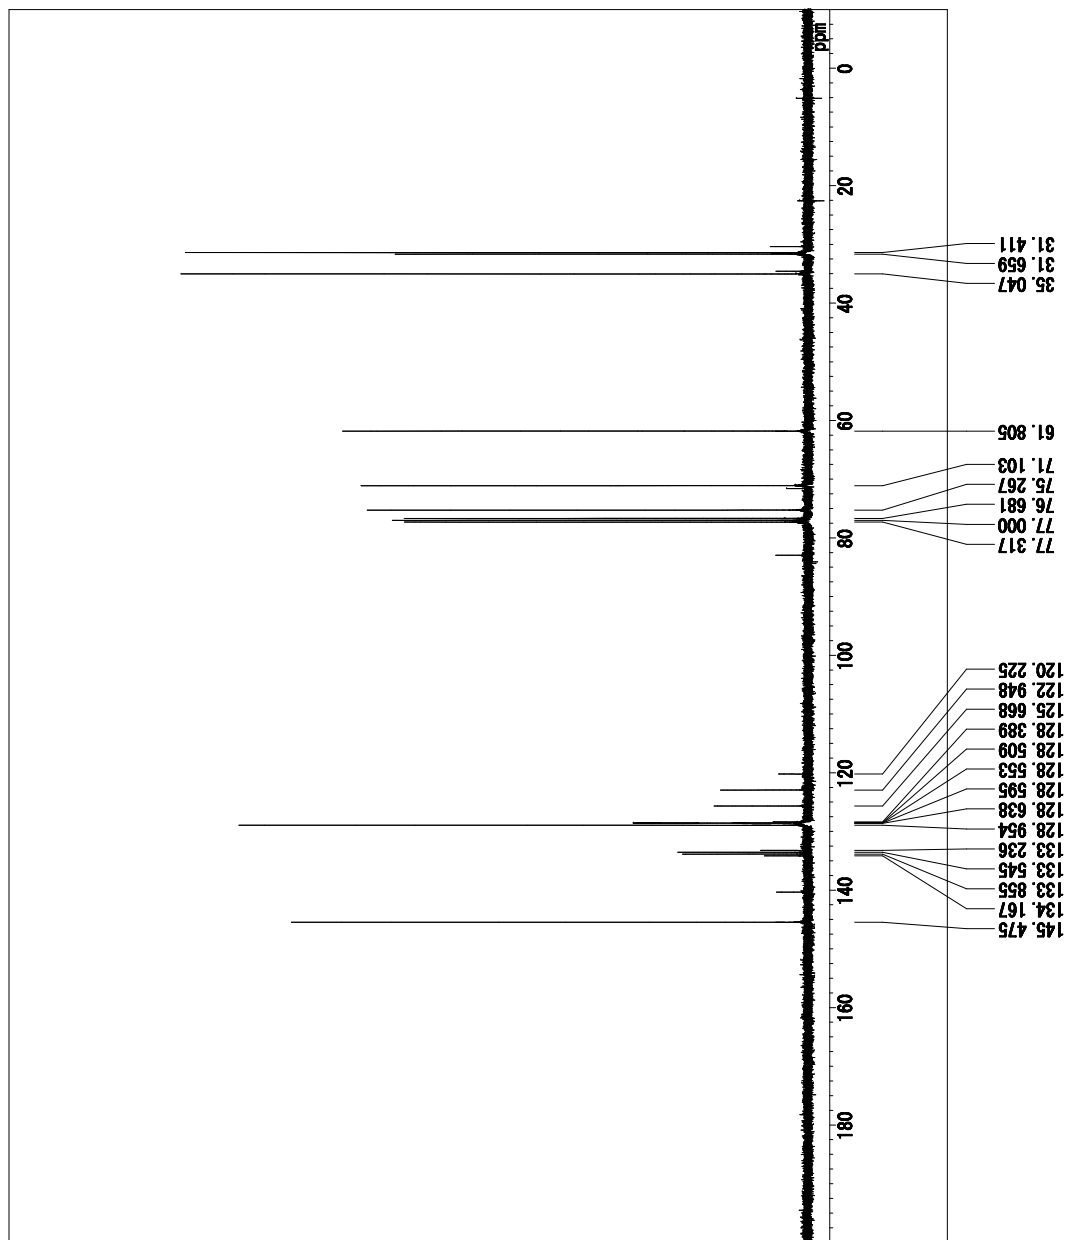

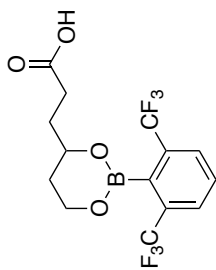

10

Comment sul3002pure2\_20160803\_01  
 Date 2016/Aug/03  
 ObsNuc <sup>1</sup>H  
 ExMode PROTON\_001  
 ObsFreq 399.45 MHz  
 Scan 8  
 AcqTime 2.569 s  
 Acc. Interval 5.569 s  
 Spinning 16.0 Hz  
 Temperature 25.0 °C  
 Solvent cdcl<sub>3</sub>

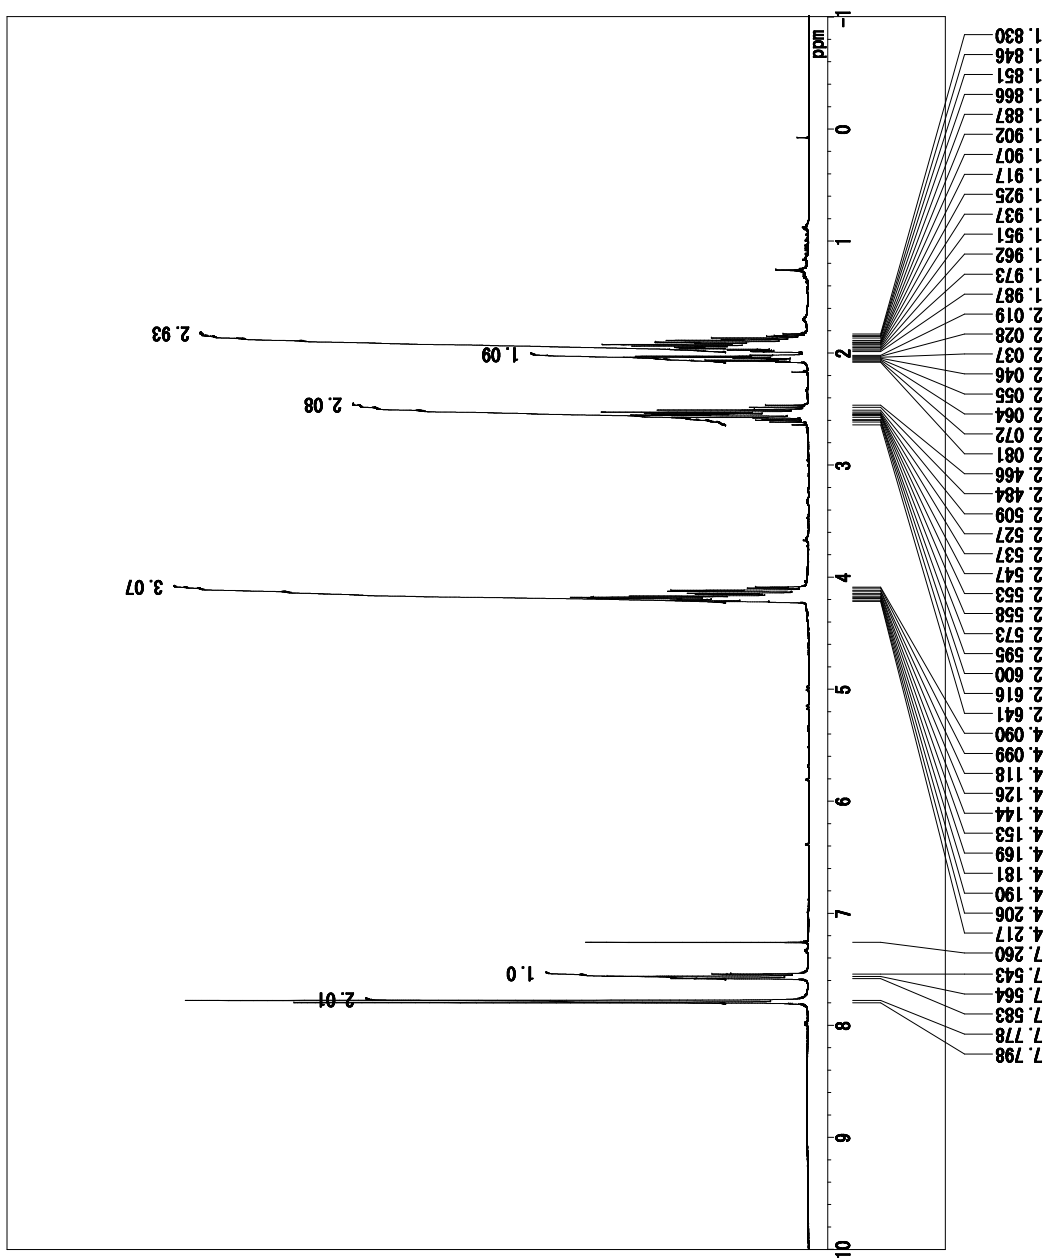

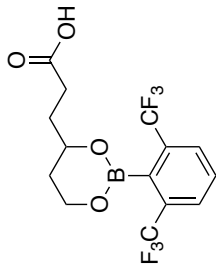

10

Comment sul3002pure2\_20160803\_01  
 Date 2016/Aug/03  
 ObsNuc <sup>13</sup>C  
 ExMode CARBON\_001  
 ObsFreq 100.45 MHz  
 Scan 1024  
 AcqTime 1.3631 s  
 Acc. Interval 3.3631 s  
 Spinning 20.0 Hz  
 Temperature 25.0 °C  
 Solvent cdc13

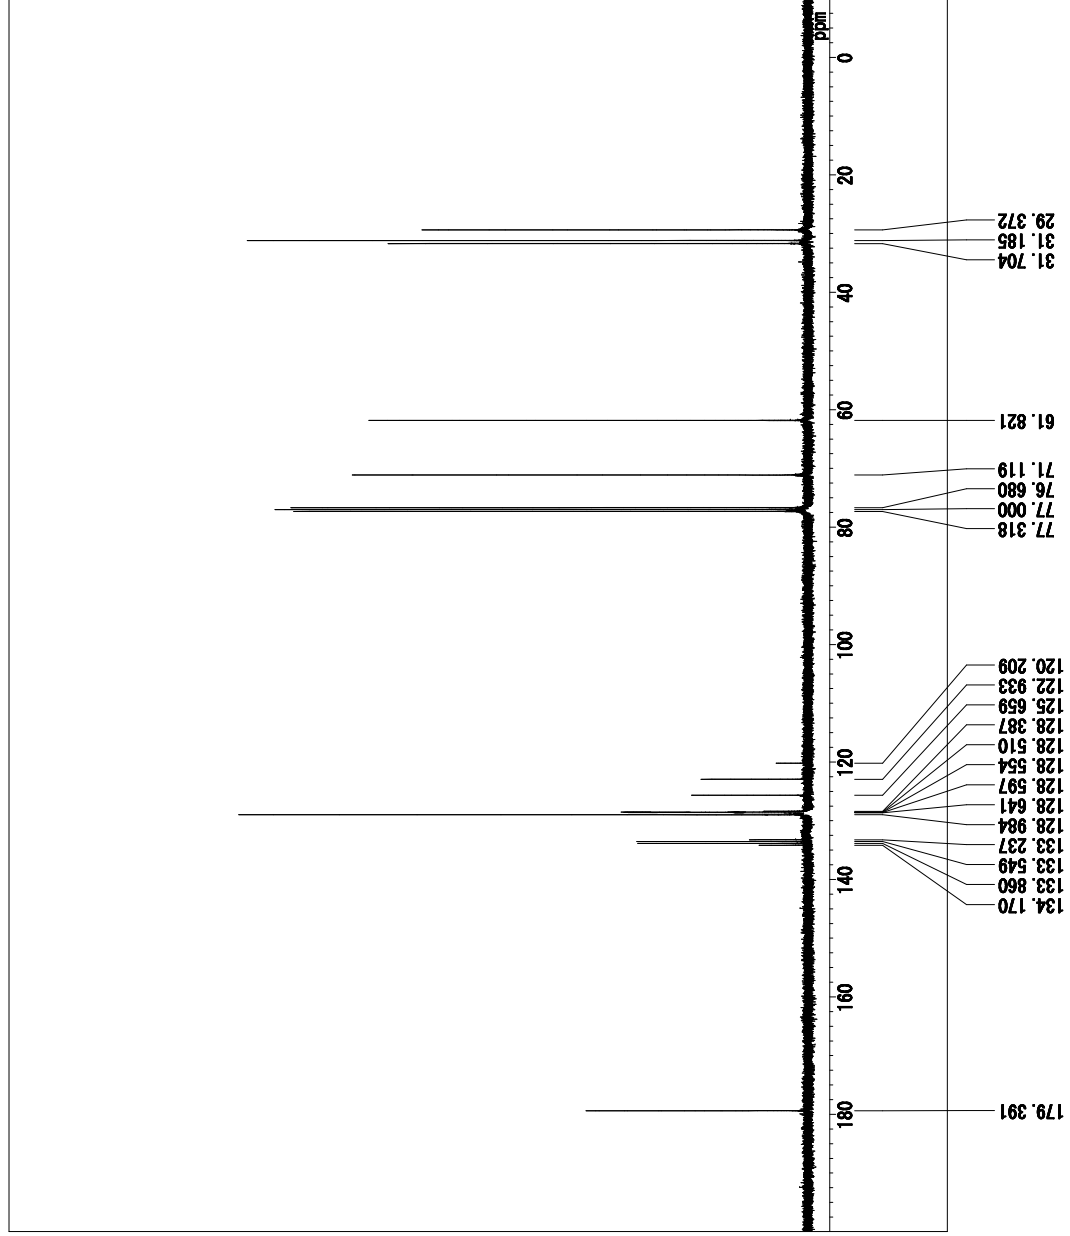

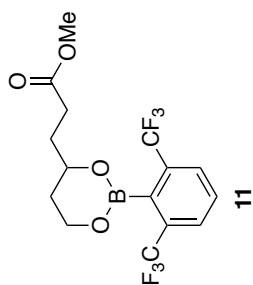

Comment sul3032pure\_20160902\_01  
 Date 2016/Sep/02  
 ObsNuc <sup>1</sup>H  
 ExMode PROTON\_001  
 ObsFreq 400.28 MHz  
 Scan 8  
 AcqTime 2.5559 s  
 Acc. Interval 5.5559 s  
 Spinning 16.0 Hz  
 Temperature 30.0 °C  
 Solvent cdcl<sub>3</sub>

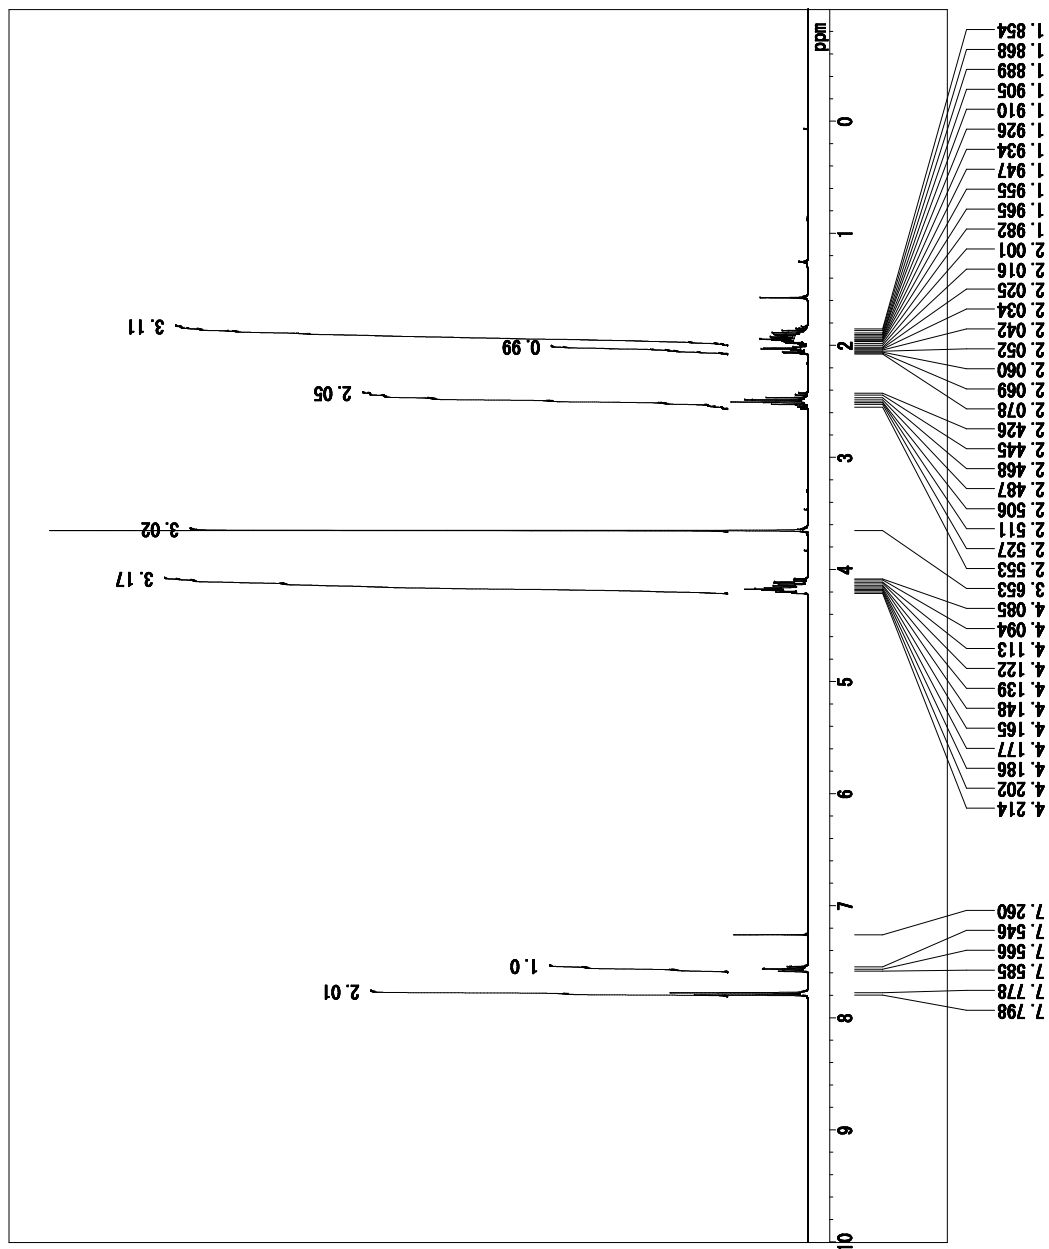



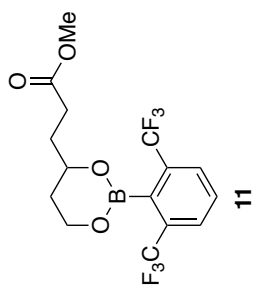

Comment su-COOMe\_20170113\_01  
 Date 2017/Jan/13  
 ObsNuc <sup>13</sup>C  
 ExMode CARBON\_001  
 ObsFreq 100.66 MHz  
 Scan 512  
 AcqTime 1.3631 s  
 Acc. Interval 3.3631 s  
 Spinning 20.0 Hz  
 Temperature 25.0 °C  
 Solvent cdc13

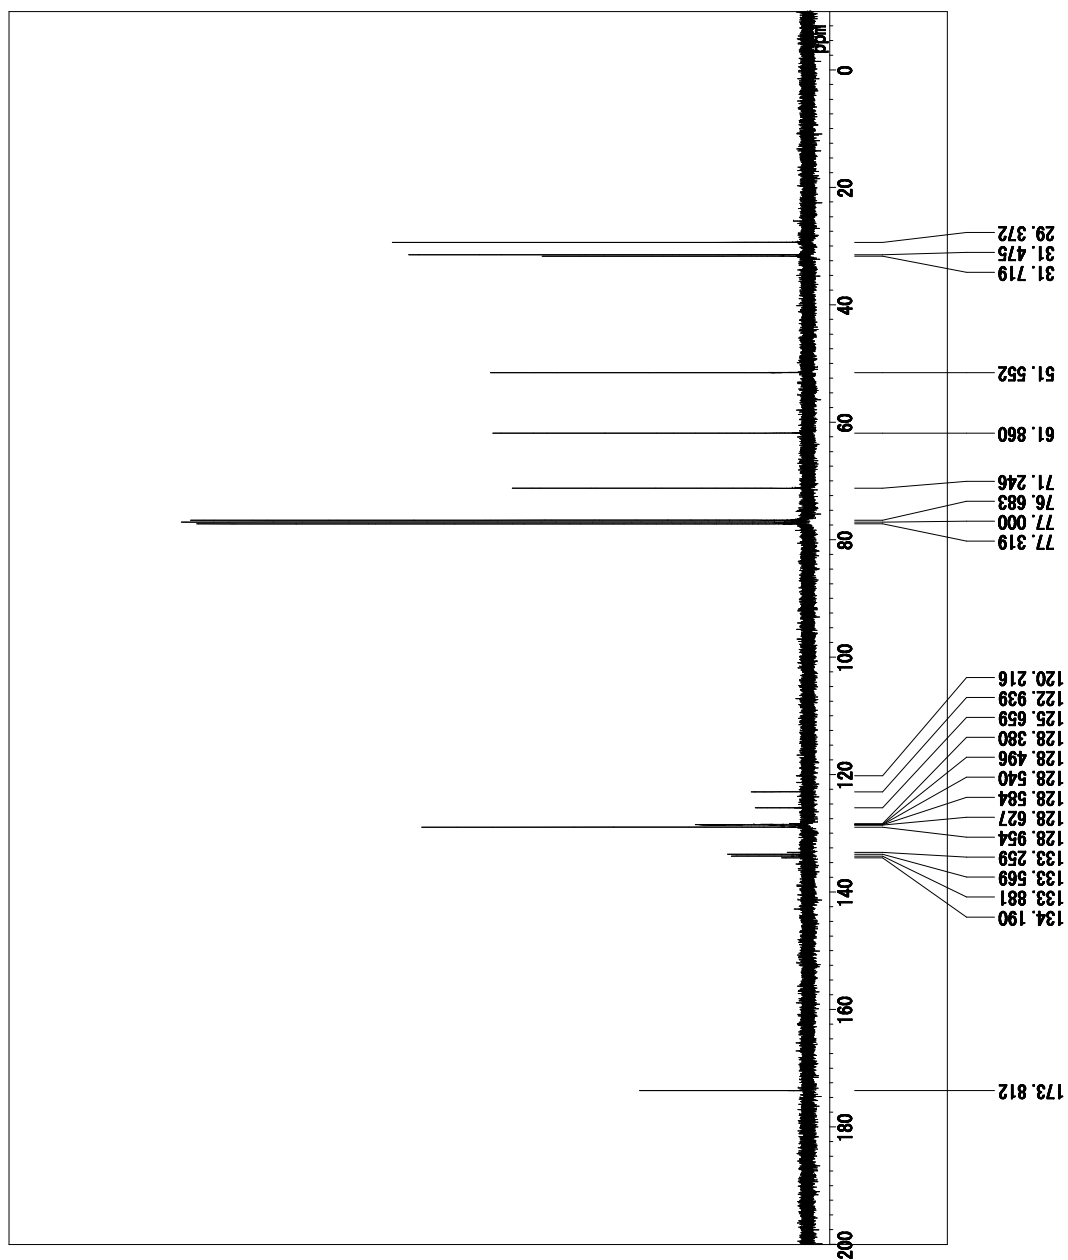

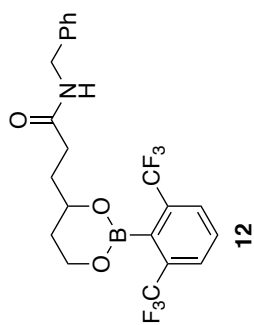

Comment sul3031pure\_20160902\_01  
 Date 2016/Sep/02  
 ObsNuc <sup>1</sup>H  
 ExMode PROTON\_001  
 ObsFreq 400.28 MHz  
 Scan 8  
 AcqTime 2.5559 s  
 Acc. Interval 5.5559 s  
 Spinning 16.0 Hz  
 Temperature 30.0 °C  
 Solvent cdcl<sub>3</sub>

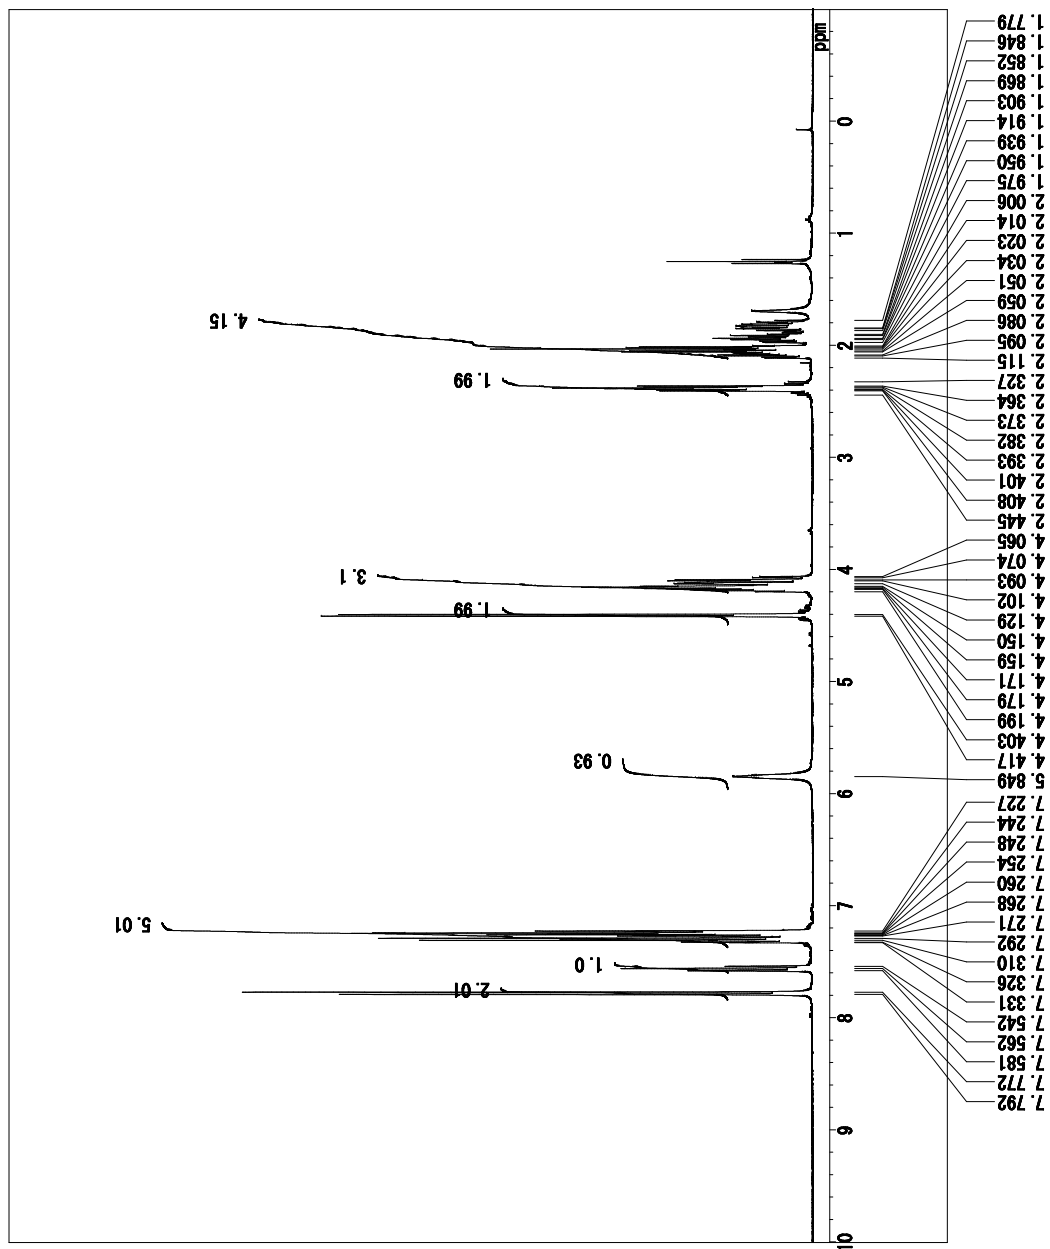



Comment sul3031-13C\_20170113\_01  
 Date 2017/Jan/13  
 ObsNuc <sup>13</sup>C  
 ExMode CARBON\_001  
 ObsFreq 100.66 MHz  
 Scan 1024  
 AcqTime 1.3631 s  
 Acc. Interval 3.3631 s  
 Spinning 20.0 Hz  
 Temperature 25.0 °C  
 Solvent cdcl<sub>3</sub>

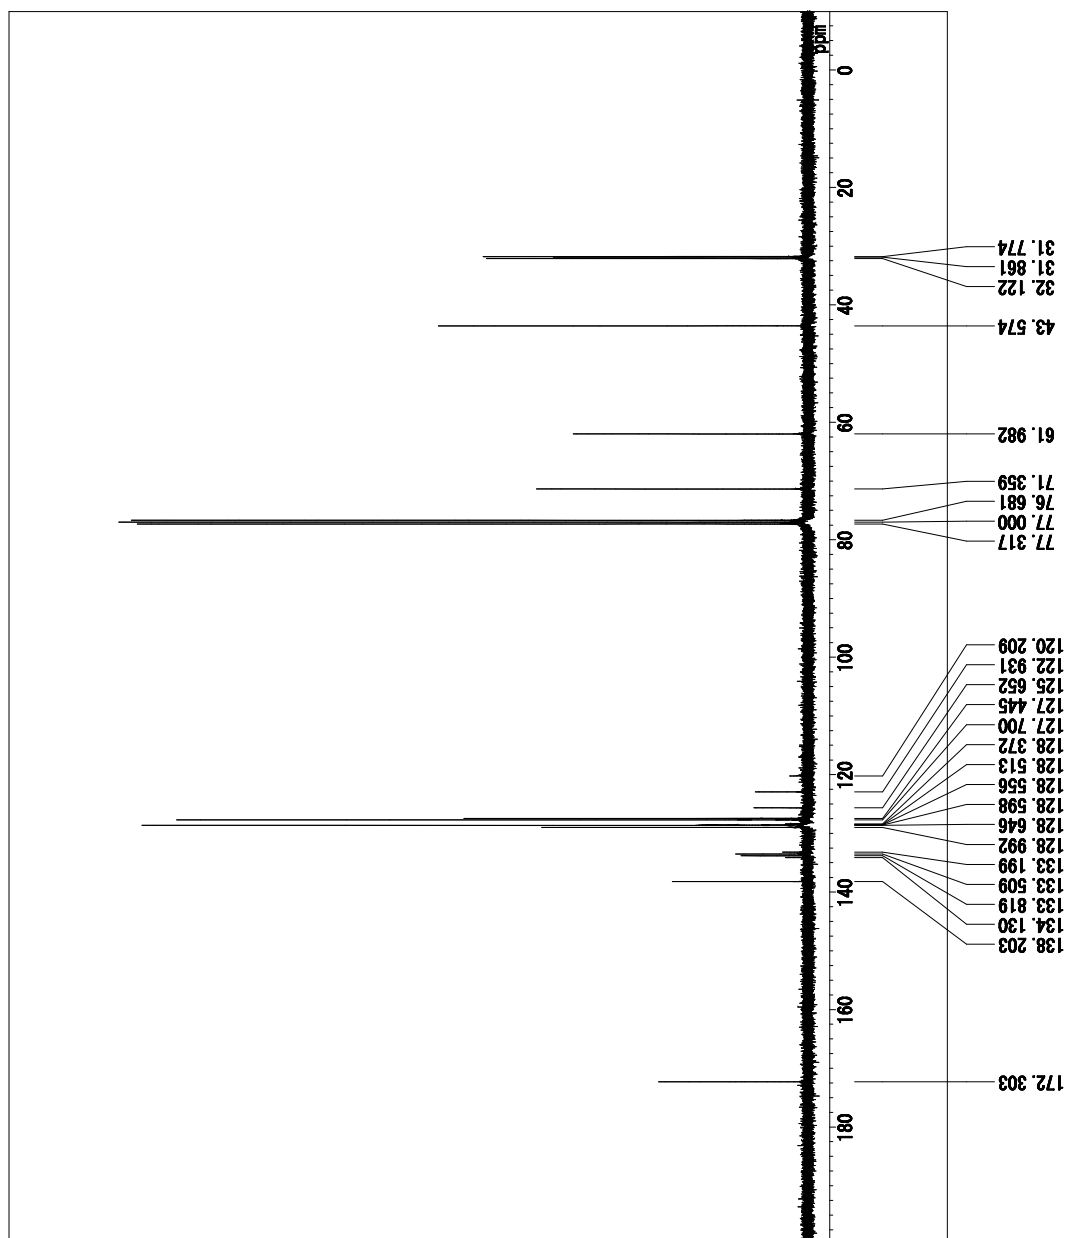

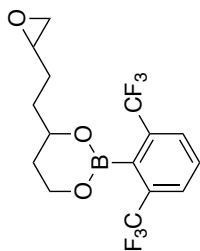

13

Comment sul1025pure2\_20161111\_01  
 Date 2016/Nov/11  
 ObsNuc <sup>1</sup>H  
 ExMode PROTON\_001  
 ObsFreq 400.28 MHz  
 Scan 8  
 AcqTime 2.5559 s  
 Acc. Interval 5.5559 s  
 Spinning 16.0 Hz  
 Temperature 25.0 °C  
 Solvent cdcl<sub>3</sub>

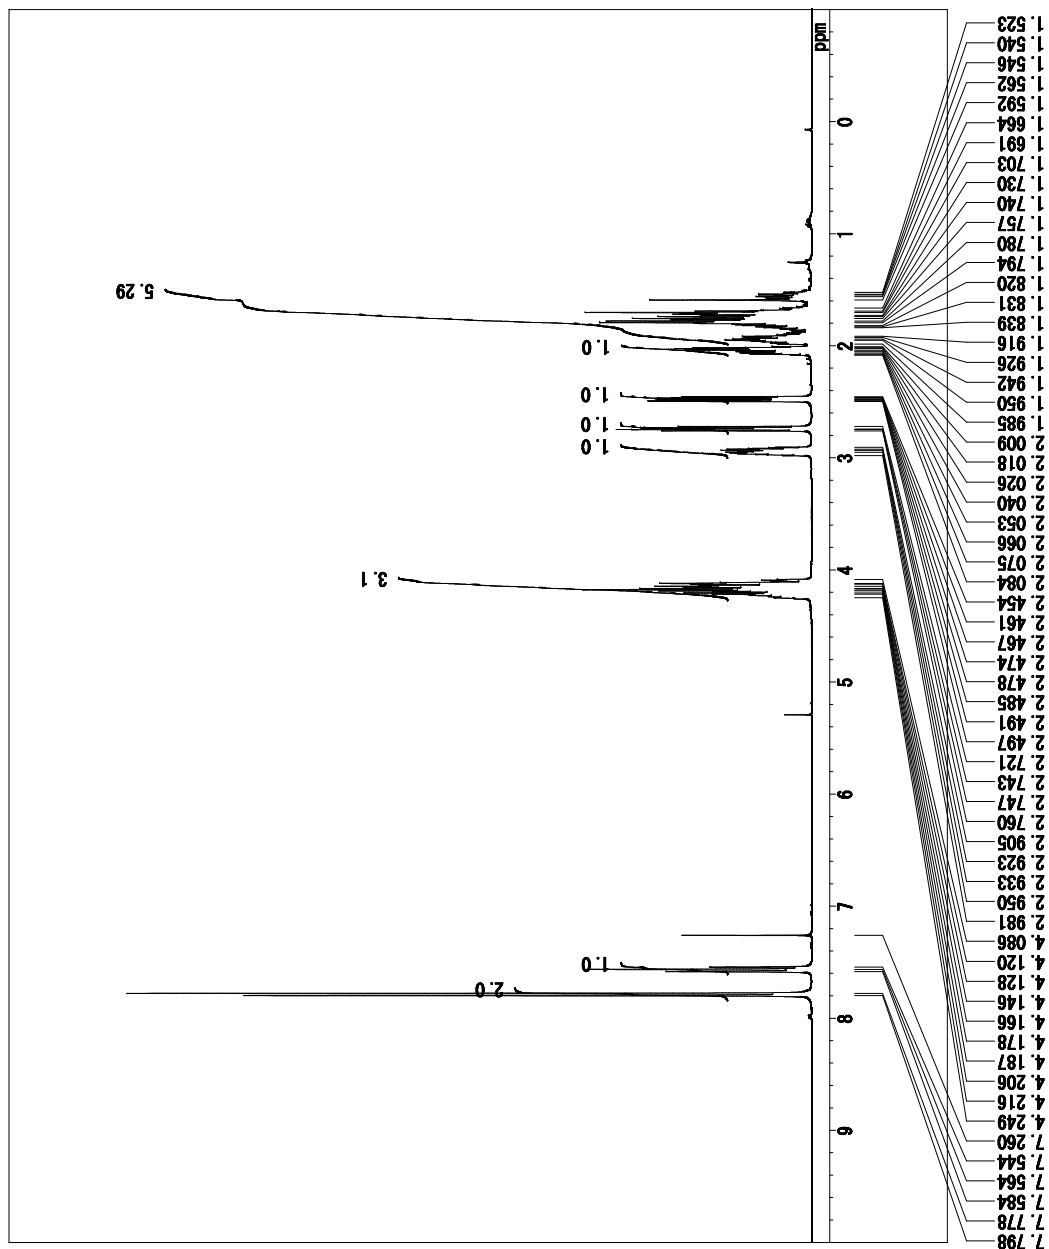



13

Comment sul1025pure2\_20161111\_01  
 Date 2016/Nov/11  
 ObsNuc <sup>13</sup>C  
 ExMode CARBON\_001  
 ObsFreq 100.66 MHz  
 Scan 512  
 AcqTime 1.3631 s  
 Acc. Interval 3.3631 s  
 Spinning 20.0 Hz  
 Temperature 25.0 °C  
 Solvent cdc13

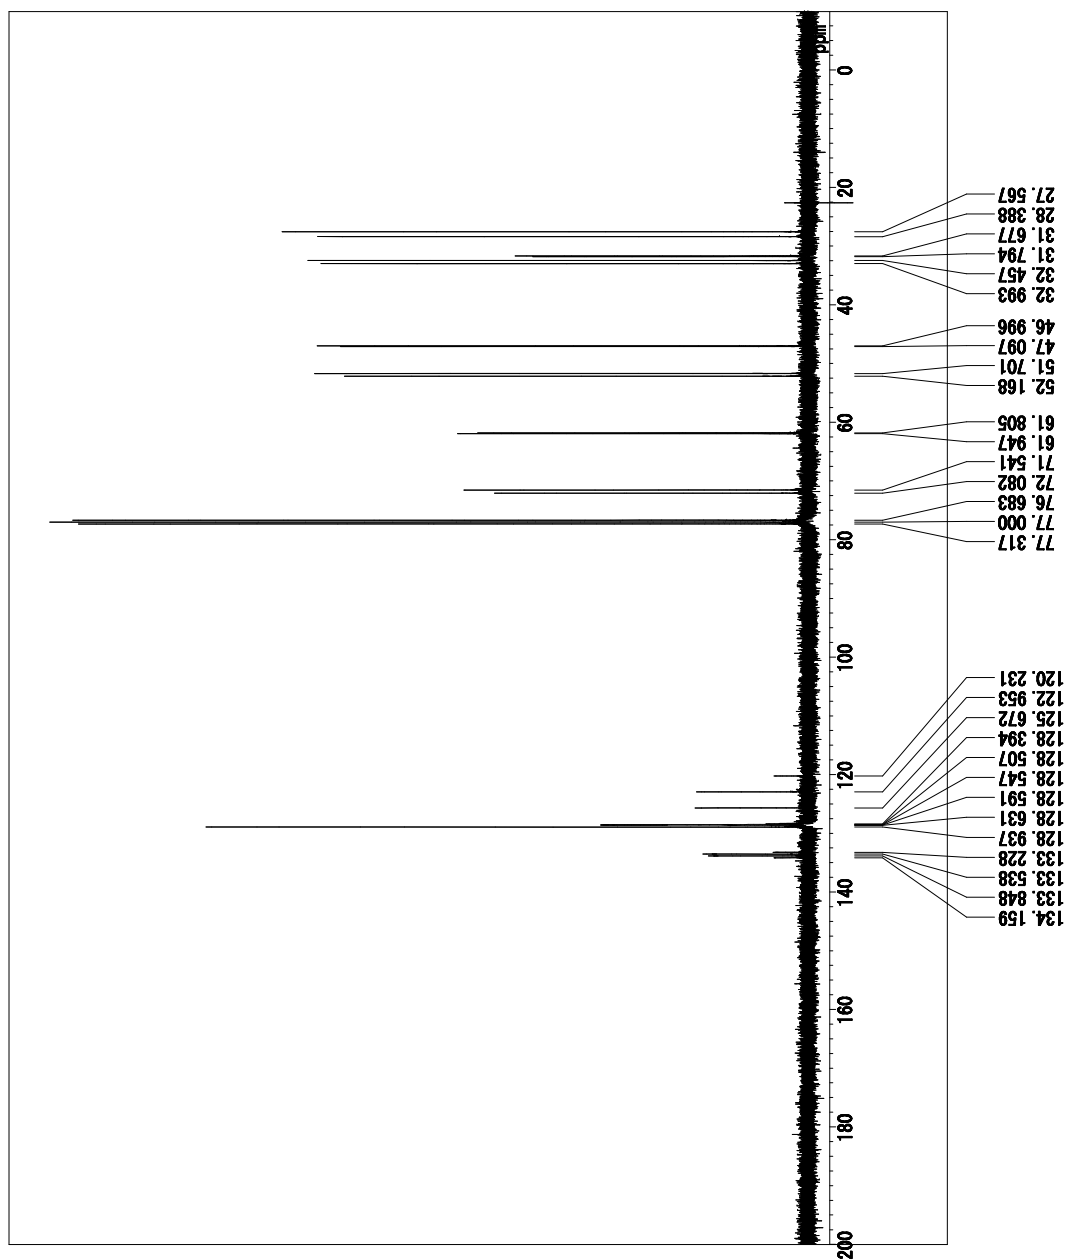

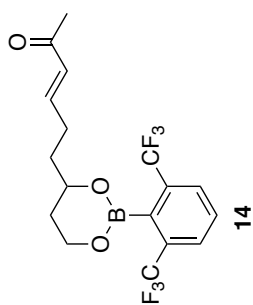

Comment sul4009pure\_20160912\_01  
 Date 2016/Sep/12  
 ObsNuc <sup>1</sup>H  
 ExMode PROTON\_001  
 ObsFreq 400.28 MHz  
 Scan 8  
 AcqTime 2.5559 s  
 Acc. Interval 5.5559 s  
 Spinning 16.0 Hz  
 Temperature 30.0 °C  
 Solvent cdcl<sub>3</sub>

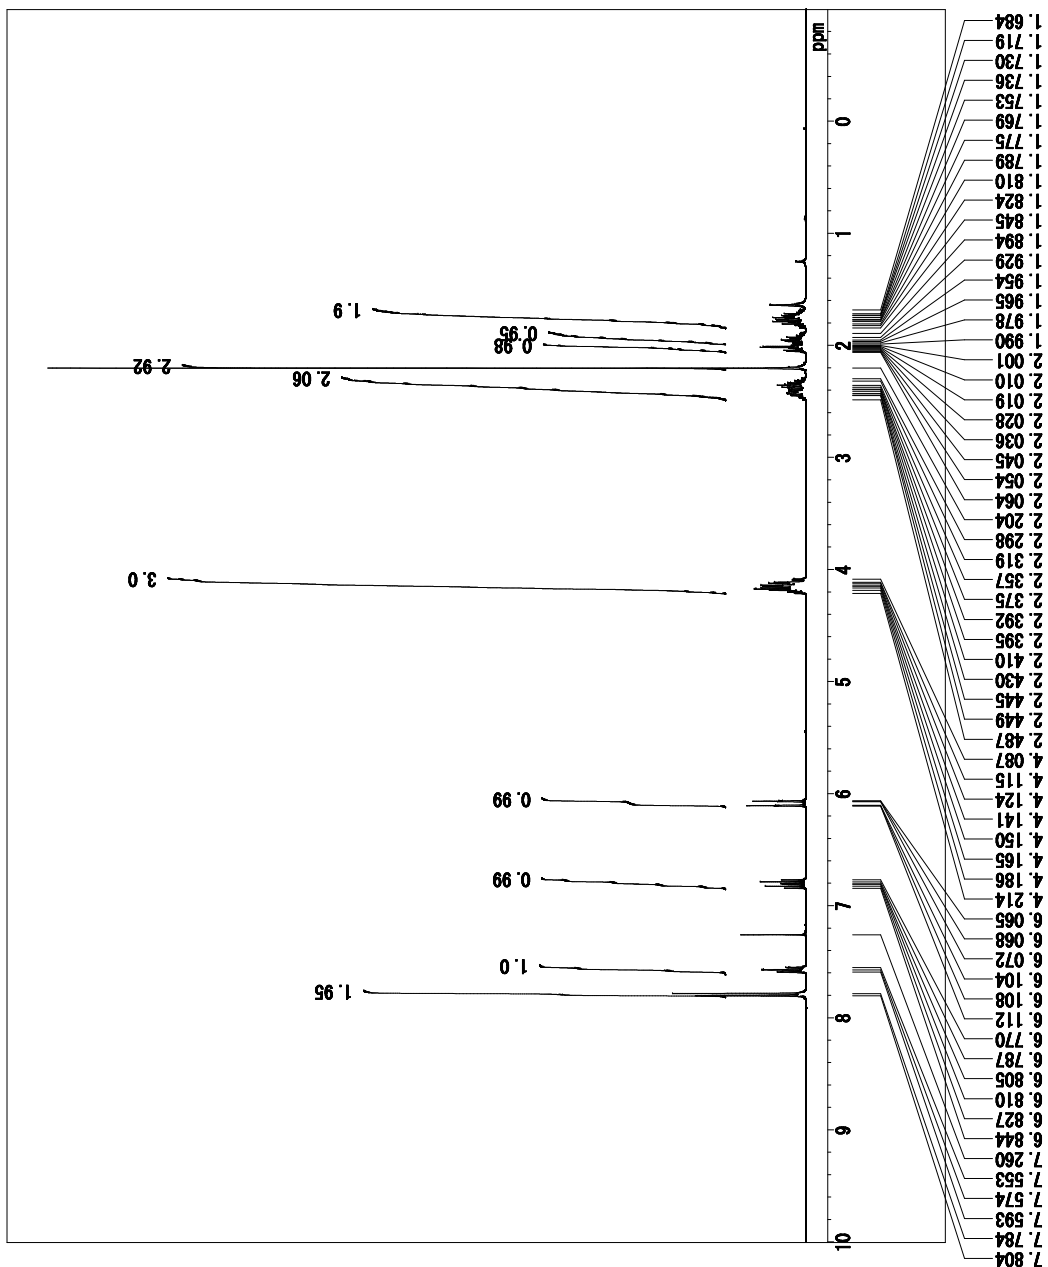

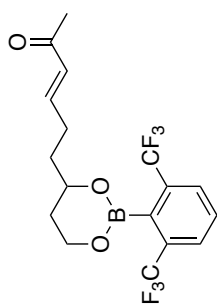

14

Comment sul4008pure-13C\_20160912\_0  
 1  
 Date 2016/Sep/12  
 ObsNuc <sup>13</sup>C  
 ExMde CARBON\_001  
 ObsFreq 100.66 MHz  
 Scan 512  
 AcqTime 1.3631 s  
 Acc. Interval 3.3631 s  
 Spinning 20.0 Hz  
 Temperature 30.0 °C  
 Solvent cdcl<sub>3</sub>

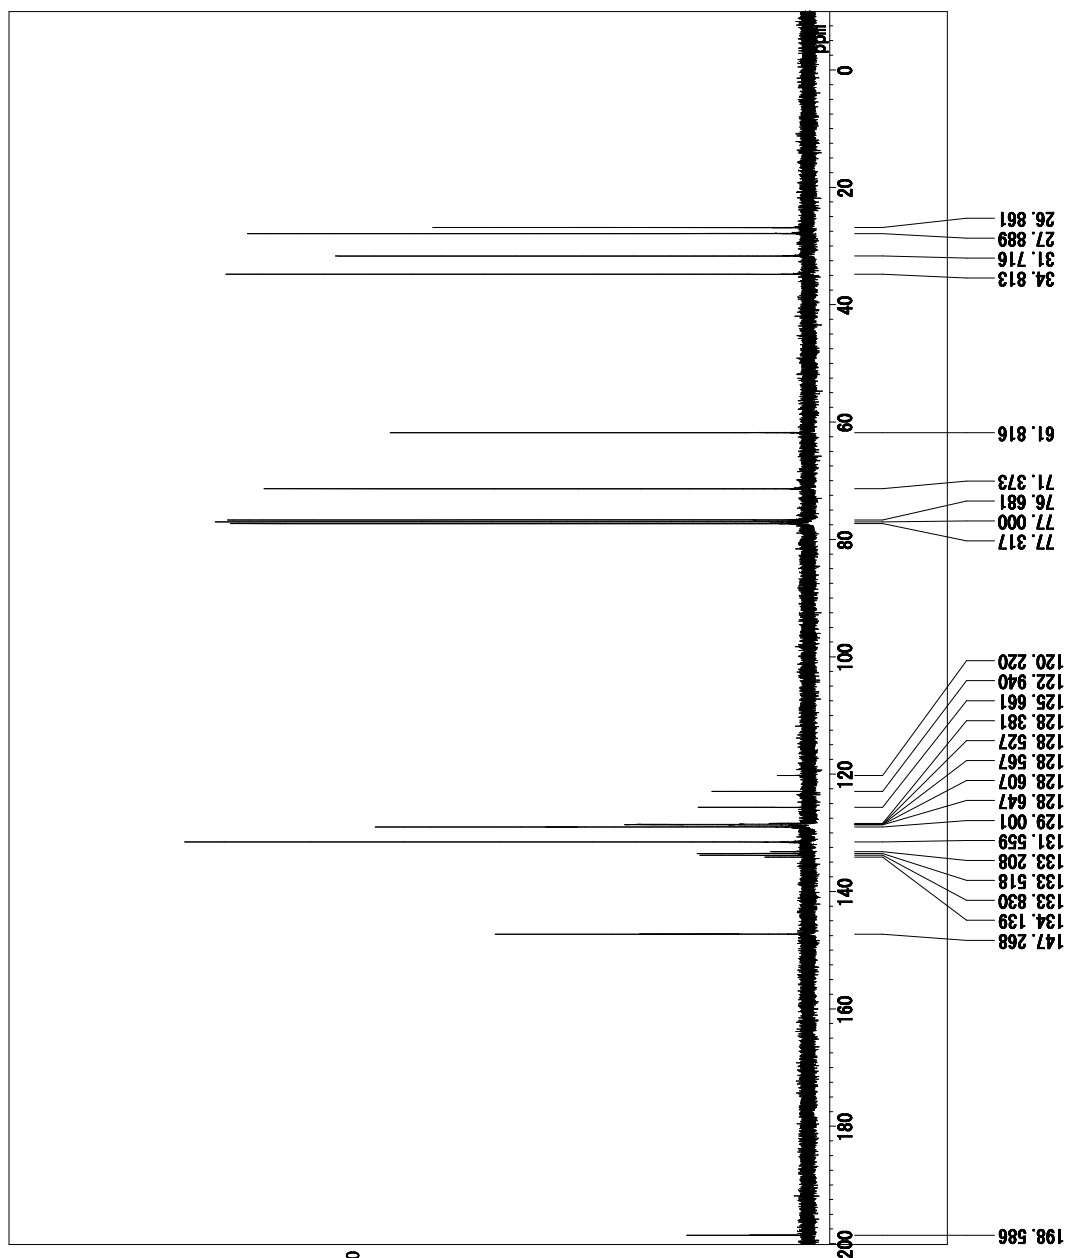

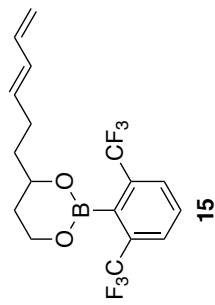

Comment sul5024pure\_20170821\_01  
 Date 2017/Aug/21  
 ObsNuc <sup>1</sup>H  
 ExMode PROTON\_001  
 ObsFreq 400.28 MHz  
 Scan 160  
 AcqTime 2.5559 s  
 Acc. Interval 5.5559 s  
 Spinning 16.0 Hz  
 Temperature 25.0 °C  
 Solvent cdcl<sub>3</sub>

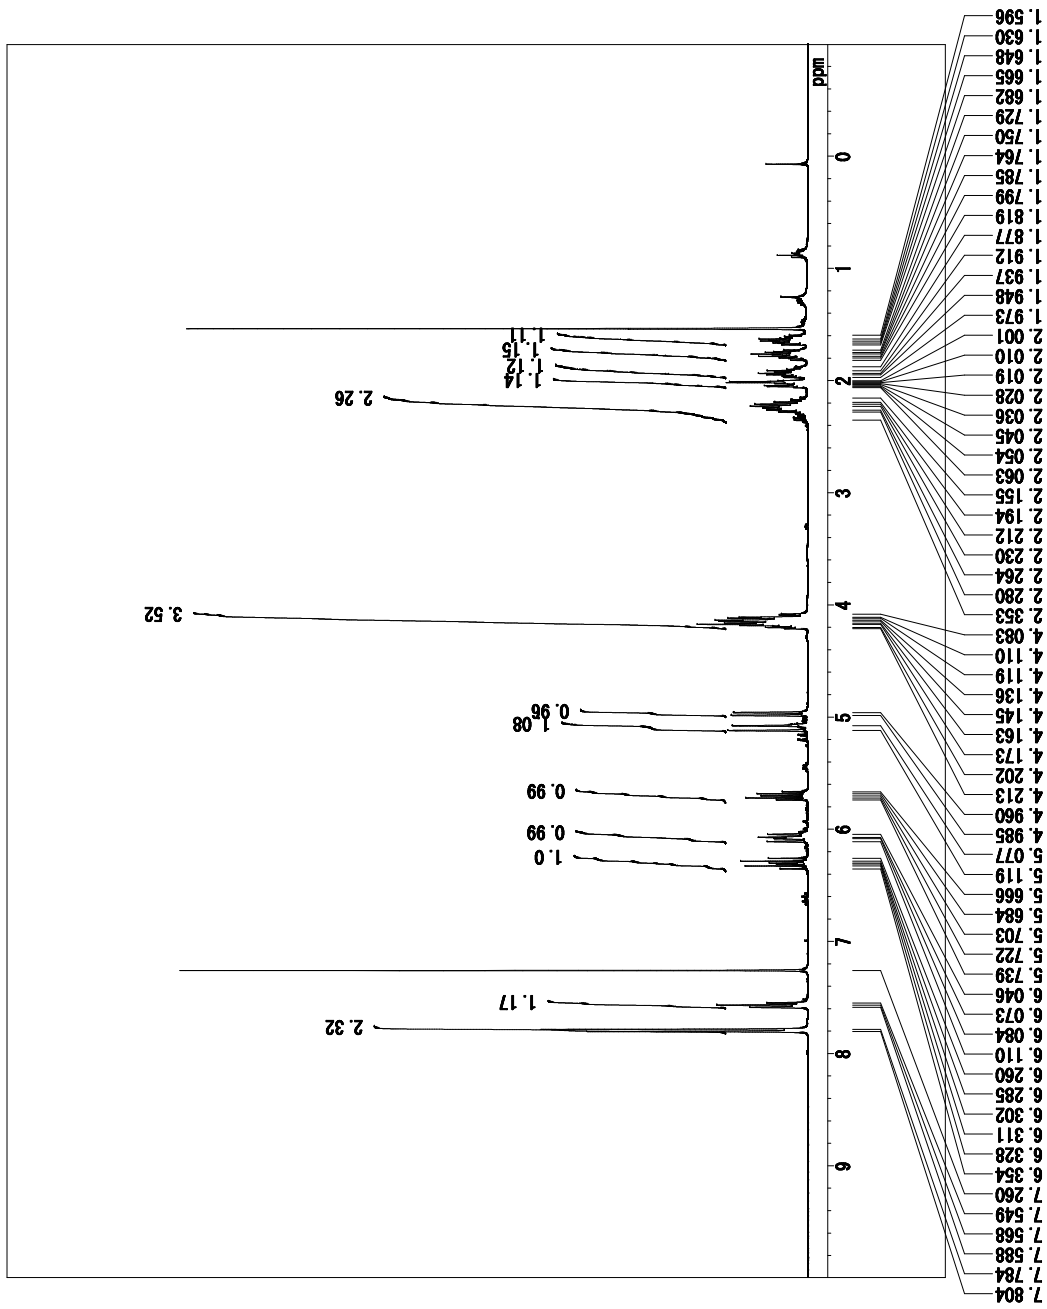





Comment sul5024-13C\_20170821\_01  
 Date 2017/Aug/21  
 ObsNuc <sup>13</sup>C  
 ExMode CARBON\_001  
 ObsFreq 100.66 MHz  
 Scan 10000  
 AcqTime 1.3631 s  
 Acc. Interval 3.3631 s  
 Spinning 20.0 Hz  
 Temperature 25.0 °C  
 Solvent cdc13

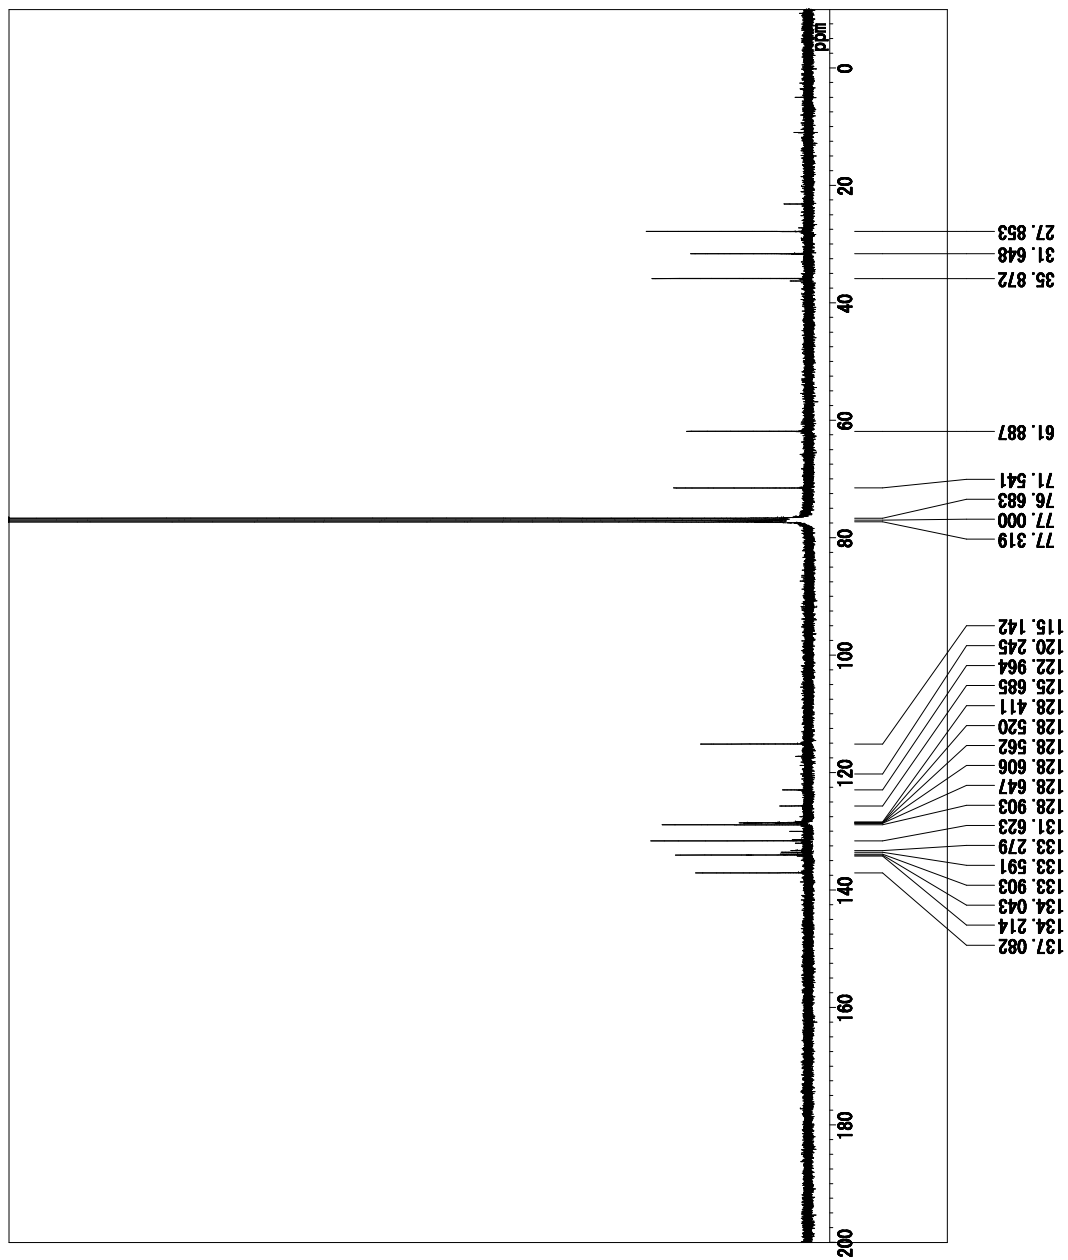

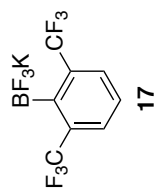

Comment su21018\_20170808\_01  
 Date 2017/Aug/08  
 ObsNuc <sup>1</sup>H  
 ExMode PROTON\_001  
 ObsFreq 399.45 MHz  
 Scan 8  
 AcqTime 2.569 s  
 Acc. Interval 5.569 s  
 Spinning 16.0 Hz  
 Temperature 25.0 °C  
 Solvent cdso<sub>3</sub>d

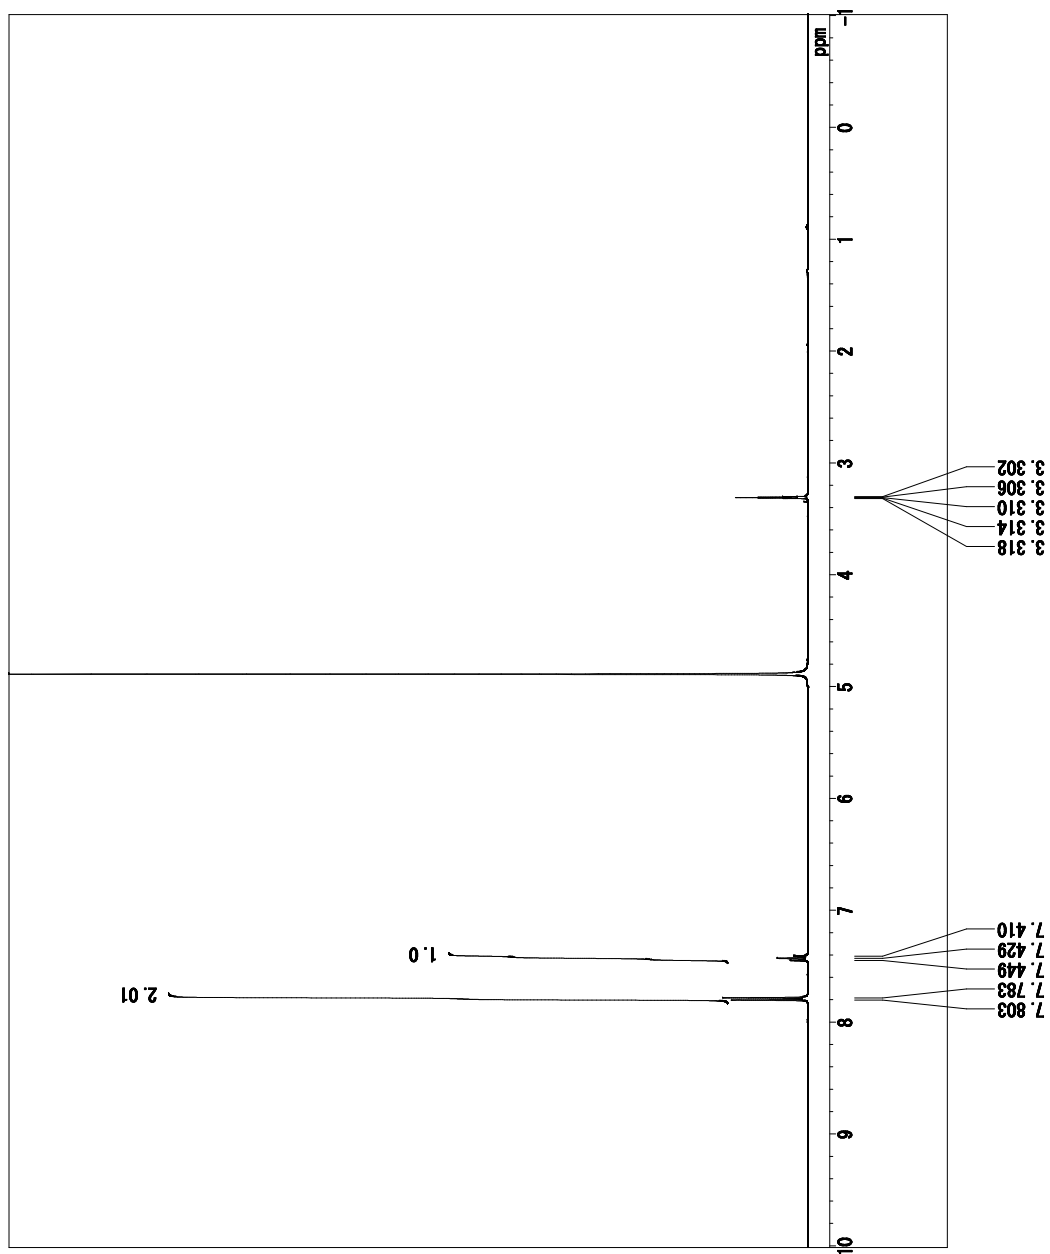



Comment su21018-13C\_20170808\_01  
 Date 2017/Aug/08  
 ObsNuc <sup>13</sup>C  
 ExMode CARBON\_001  
 ObsFreq 100.45 MHz  
 Scan 912  
 AcqTime 1.3631 s  
 Acc. Interval 3.3631 s  
 Spinning 20.0 Hz  
 Temperature 25.0 °C  
 Solvent cd<sub>3</sub>od

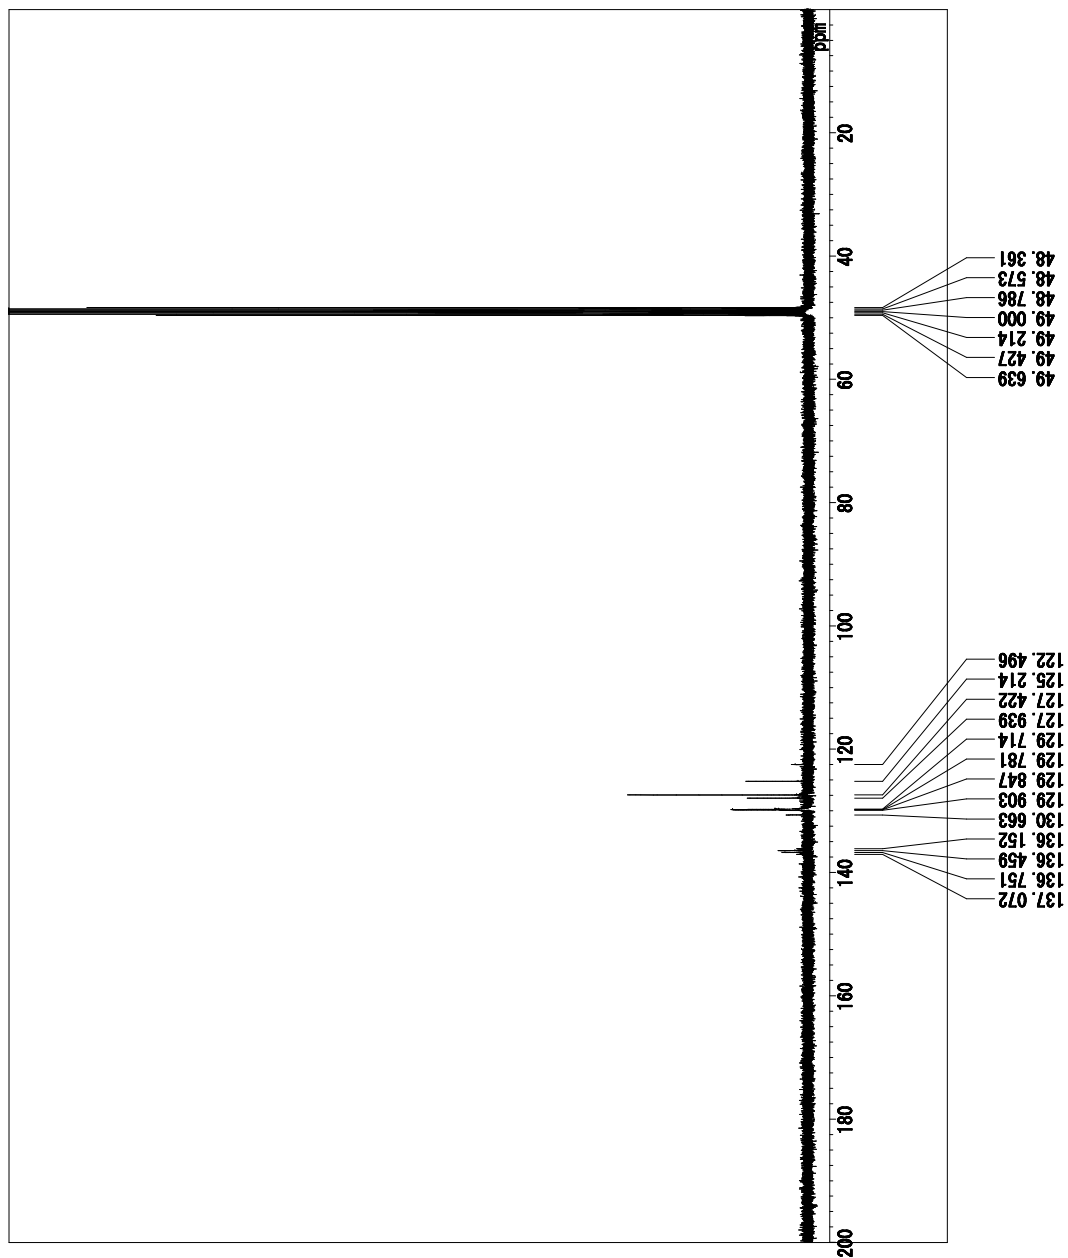

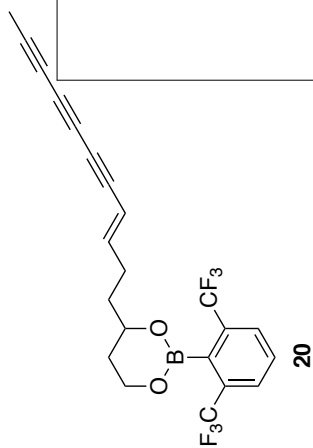

Comment sul6004pure-3\_20161219  
 Date 2016/Dec/19  
 ObsNuc <sup>1</sup>H  
 ExMode PROTON\_001  
 ObsFreq 400.28 MHz  
 Scan 8  
 AcqTime 2.5559 s  
 Acc.Interval 5.5559 s  
 Spinning 16.0 Hz  
 Temperature 25.0 °C  
 Solvent cdcl<sub>3</sub>

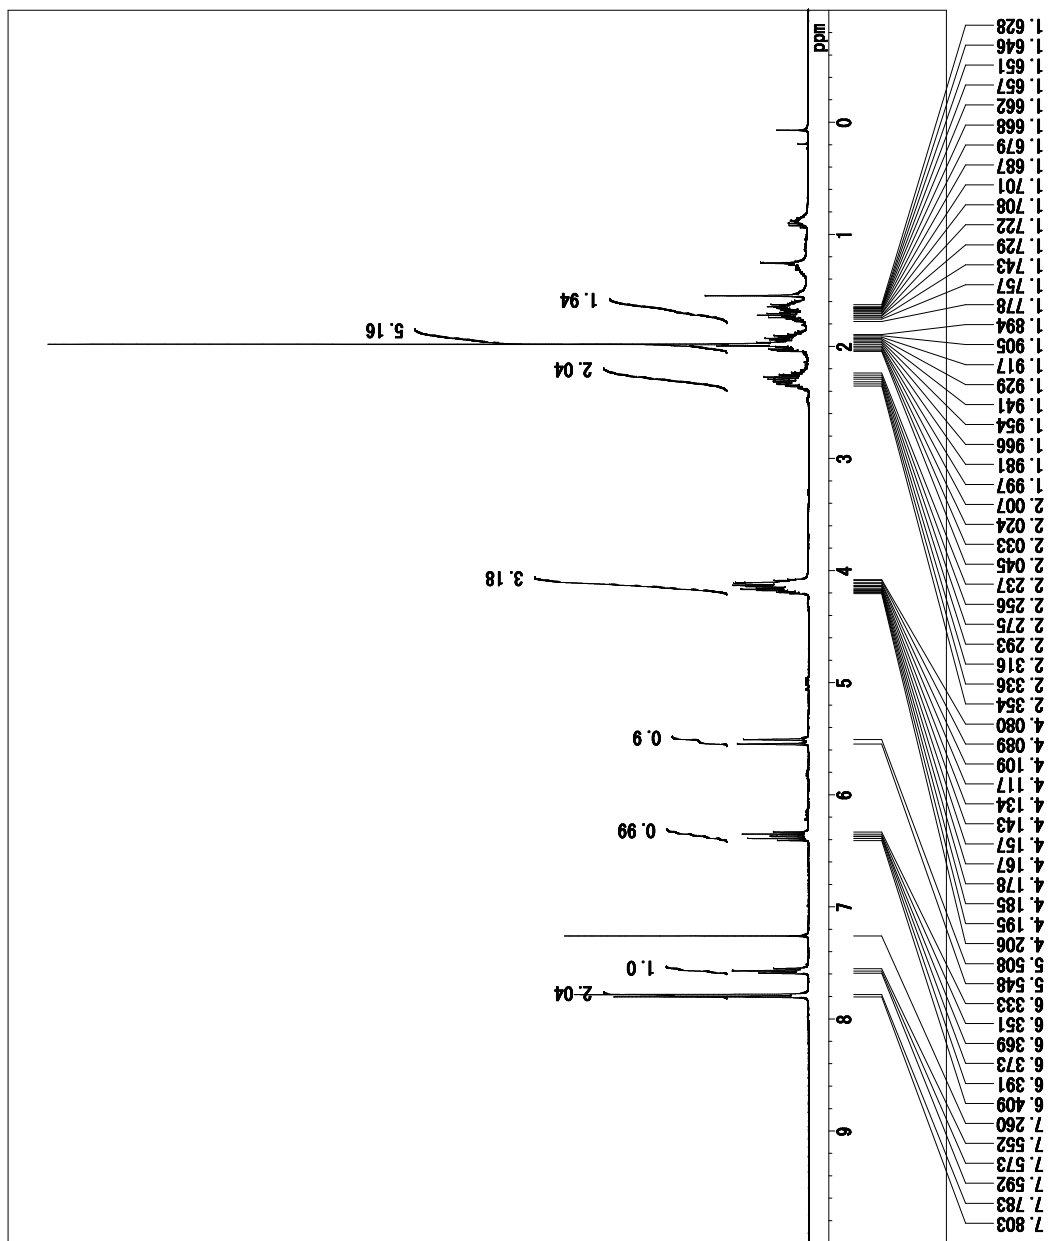

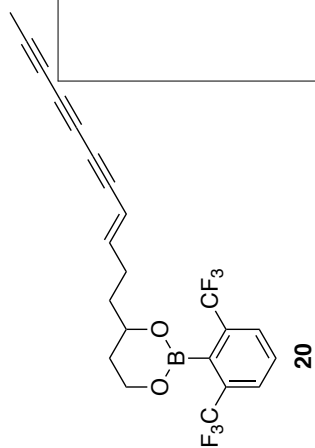

20

Comment sul6004-13C-20170126\_01  
 Date 2017/Jan/26  
 ObsNuc  $^{13}\text{C}$   
 ExMode CARBON\_001  
 ObsFreq 100.66 MHz  
 Scan 672  
 AcqTime 1.3631 s  
 Acc. Interval 3.3631 s  
 Spinning 20.0 Hz  
 Temperature 25.0  $^{\circ}\text{C}$   
 Solvent  $\text{cdcl}_3$

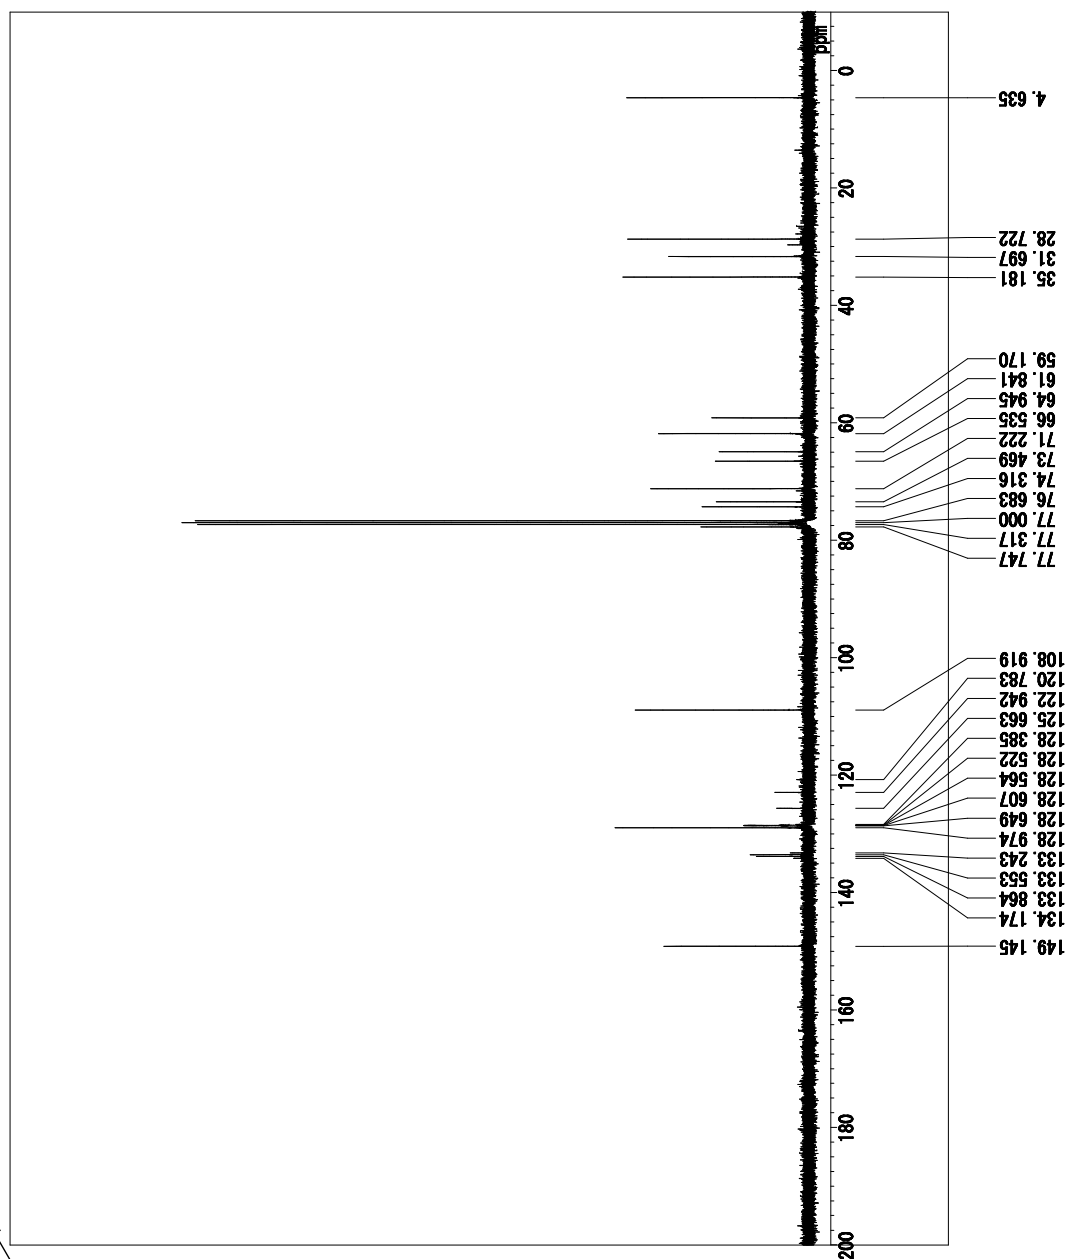

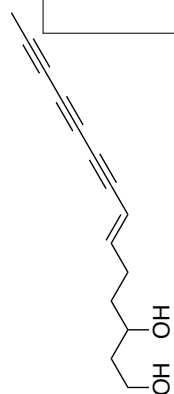

18

Comment su20019pure\_20170705\_01  
 Date 2017/Jul/05  
 ObsNuc <sup>1</sup>H  
 ExMode PROTON\_001  
 ObsFreq 400.28 MHz  
 Scan 8  
 AcqTime 2.5559 s  
 Acc.Interval 5.5559 s  
 Spinning 16.0 Hz  
 Temperature 25.0 °C  
 Solvent cdcl<sub>3</sub>

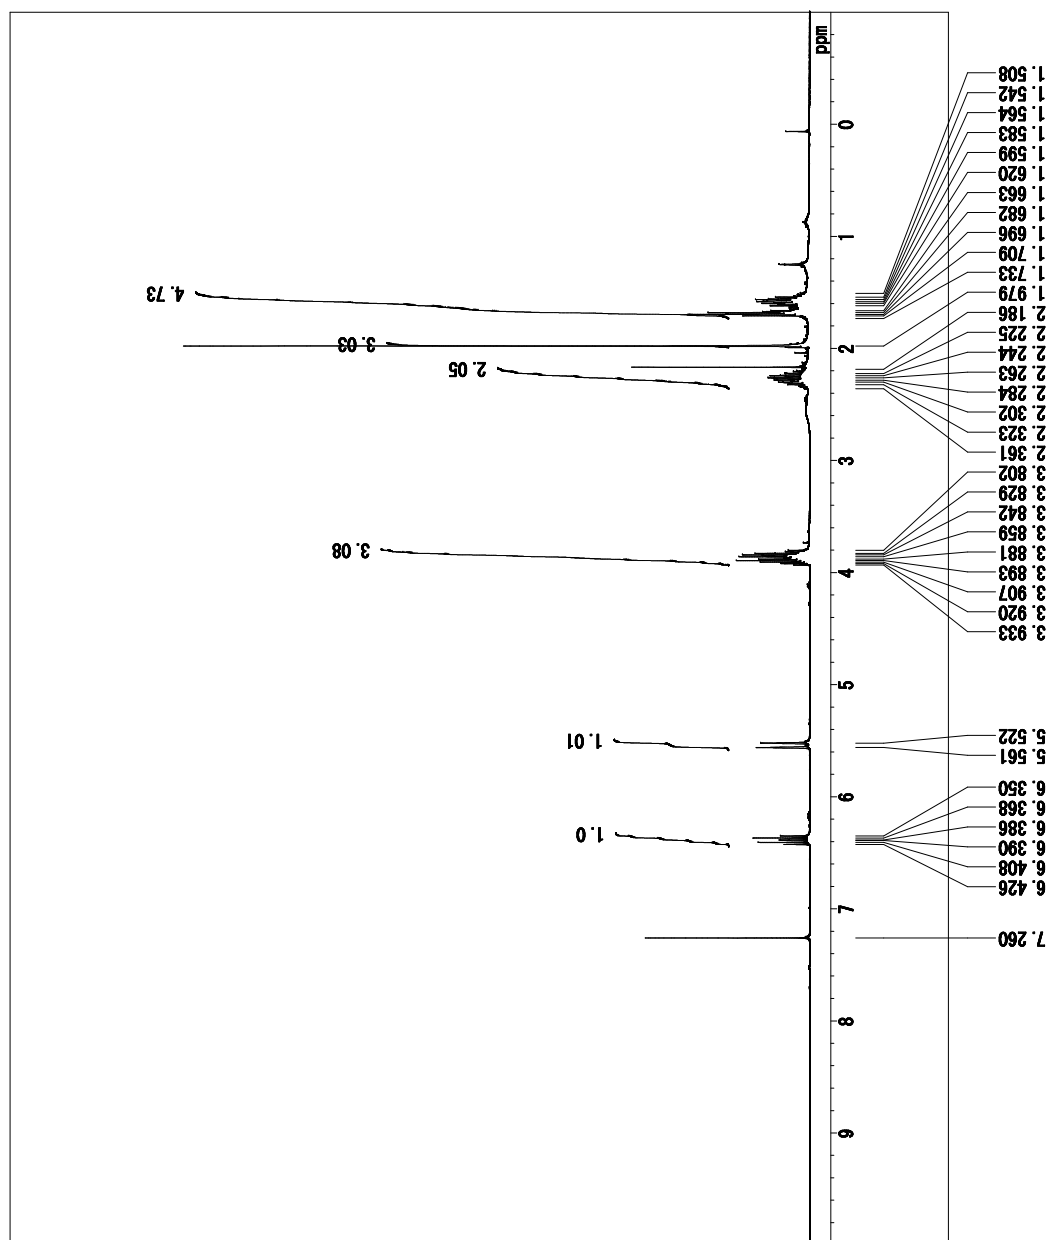

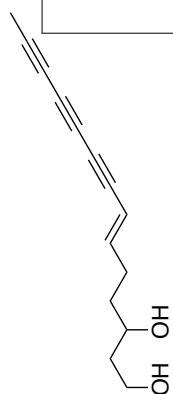

18

Comment min\_02042\_pure\_13C\_2017062  
 0\_01  
 Date 2017/Jun/20  
 ObsNuc <sup>13</sup>C  
 ExMode CARBON\_001  
 ObsFreq 100.45 MHz  
 Scan 752  
 AcqTime 1.3631 s  
 Acc. Interval 3.3631 s  
 Spinning 20.0 Hz  
 Temperature 25.0 °C  
 Solvent cdcl<sub>3</sub>

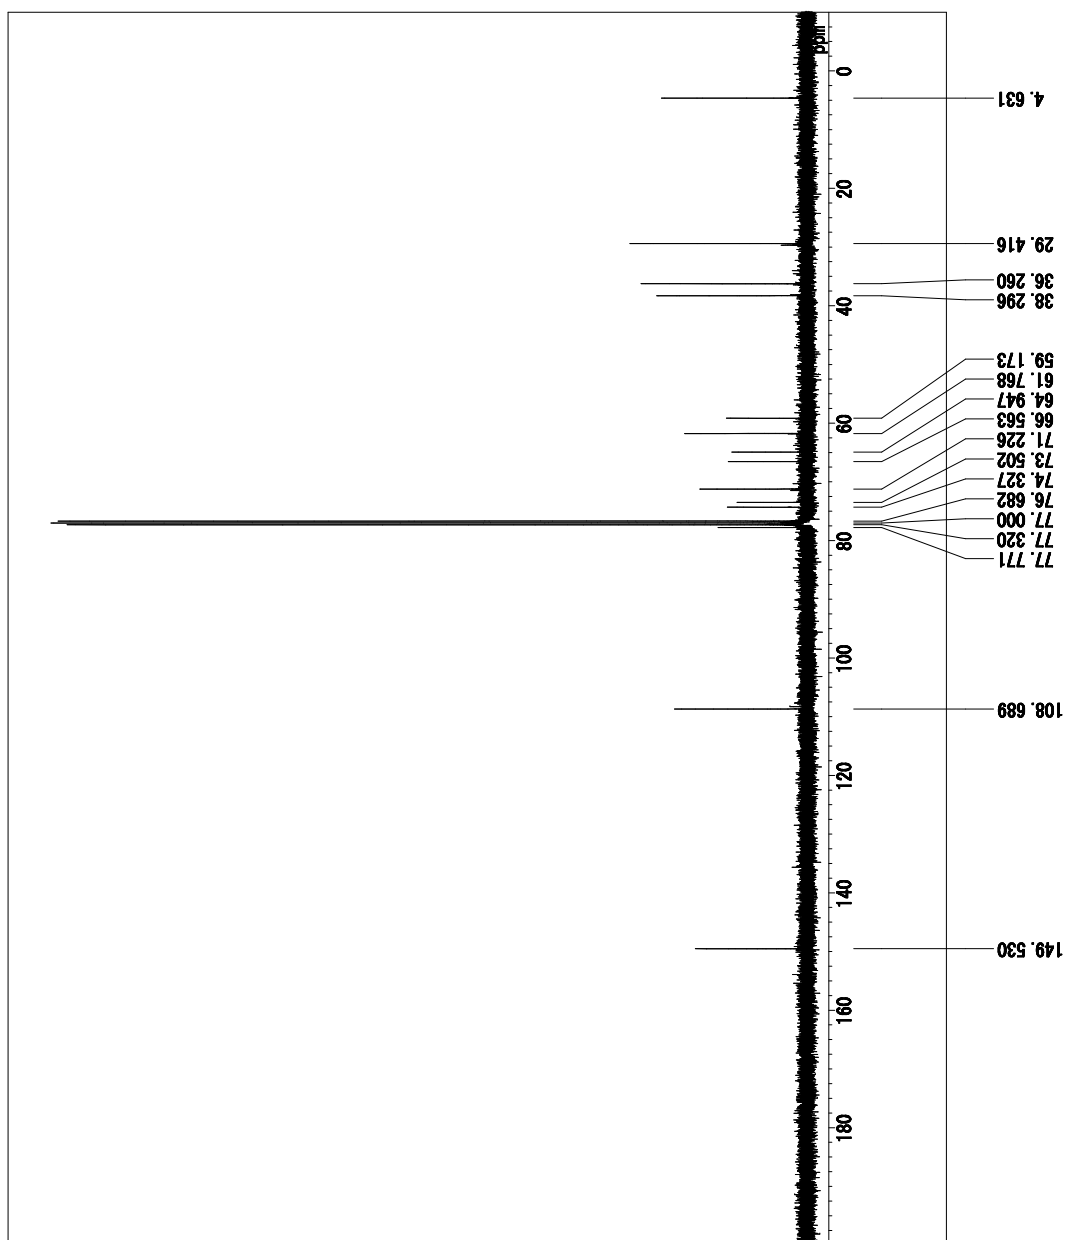

## References

- (1) (a) Wilen, S. H.; Shen, D.; Licata, J. M.; Baldwin, E.; Russell, C. S. *Heterocycles* **1984**, *22*, 1747–1757. (b) Manoharan, M.; Jayaraman, M.; Rajeev, K. G.; Eltepu, L.; Ansell, S.; Chen, J. U.S. Patent WO 2010054401, May 14, 2010.
- (2) (a) Mukai, C.; Miyakoshi, N.; Hanaoka, M. *J. Org. Chem.* **2001**, *66*, 5875–5880. (b) Kumar, C. R.; Tsai, C.-H.; Chao, Y.-S.; Lee, J.-C. *Chem. Eur. J.* **2011**, *17*, 8696–8703.
- (3) Cornet, S. M.; Dillon, K. B.; Entwistle, C. D.; Fox, M. A.; Goeta, A. E.; Goodwin, H. P.; Marder, T. B.; Tompson, A. T. *Dalton Trans.* **2003**, 4395–4405.
- (4) Schlosser, M.; Katsoulos, G.; Takagishi, S. *Synlett* **1990**, 747–748.
- (5) (a) Tsuneda, T.; Hirao, K. *WIREs Comput Mol Sci* **2014**, *4*, 375–390. (b) Tsuneda, T.; Suzumura, T.; Hirao, K. *J. Chem. Phys.* **1999**, *110*, 10664–10678.
- (6) Becke, A. D. *Phys. Rev. A* **1988**, *38*, 3098–3100.
- (7) (a) Bader, R. F. W. *Chem. Rev.* **1991**, *91*, 893–928. (b) Dunitz, J. D.; Gavezzotti, A. *Angew. Chem., Int. Ed.* **2005**, *44*, 1766–1787.
- (8) (a) Lee, D. Y.; Martin, J. C. *J. Am. Chem. Soc.* **1984**, *106*, 5745–5746. (b) Yamashita, M.; Yamamoto, Y.; Akiba, K.; Nagase, S. *Angew. Chem., Int. Ed.* **2000**, *39*, 4055–4058. (c) Yamashita, M.; Yamamoto, Y.; Akiba, K.; Hashizume, D.; Iwasaki, F.; Takagi, N.; Nagase, S. *J. Am. Chem. Soc.* **2005**, *127*, 4354–4371. (d) Nakatsuji, J.; Moriyama, Y.; Matsukawa, S.; Yamamoto, Y.; Akiba, K. *Main Group Chem.* **2006**, *5*, 277–285. (e) Yano, T.; Yamaguchi, T.; Yamamoto, Y. *Chem. Lett.* **2009**, *38*, 794–795. (f) Nakatsuji, J.; Yamamoto, Y. *Bull. Chem. Soc. Jpn.* **2010**, *83*, 767–776. (g) Hirano, Y.; Kojima, S.; Yamamoto, Y. *J. Org. Chem.* **2011**, *76*, 2123–2131. (h) Dou, C.; Saito, S.; Yamaguchi, S. *J. Am. Chem. Soc.* **2013**, *135*, 9346–9349.
